# Supplementary material for: TP53 exon-6 truncating mutations produce separation of function isoforms with pro-tumorigenic functions
Source: eLife journal article supplement (doi:10.7554/elife.17929), 2016-10-19
Supplement: supp [file elife-17929-supp-v2.zip]

**A**

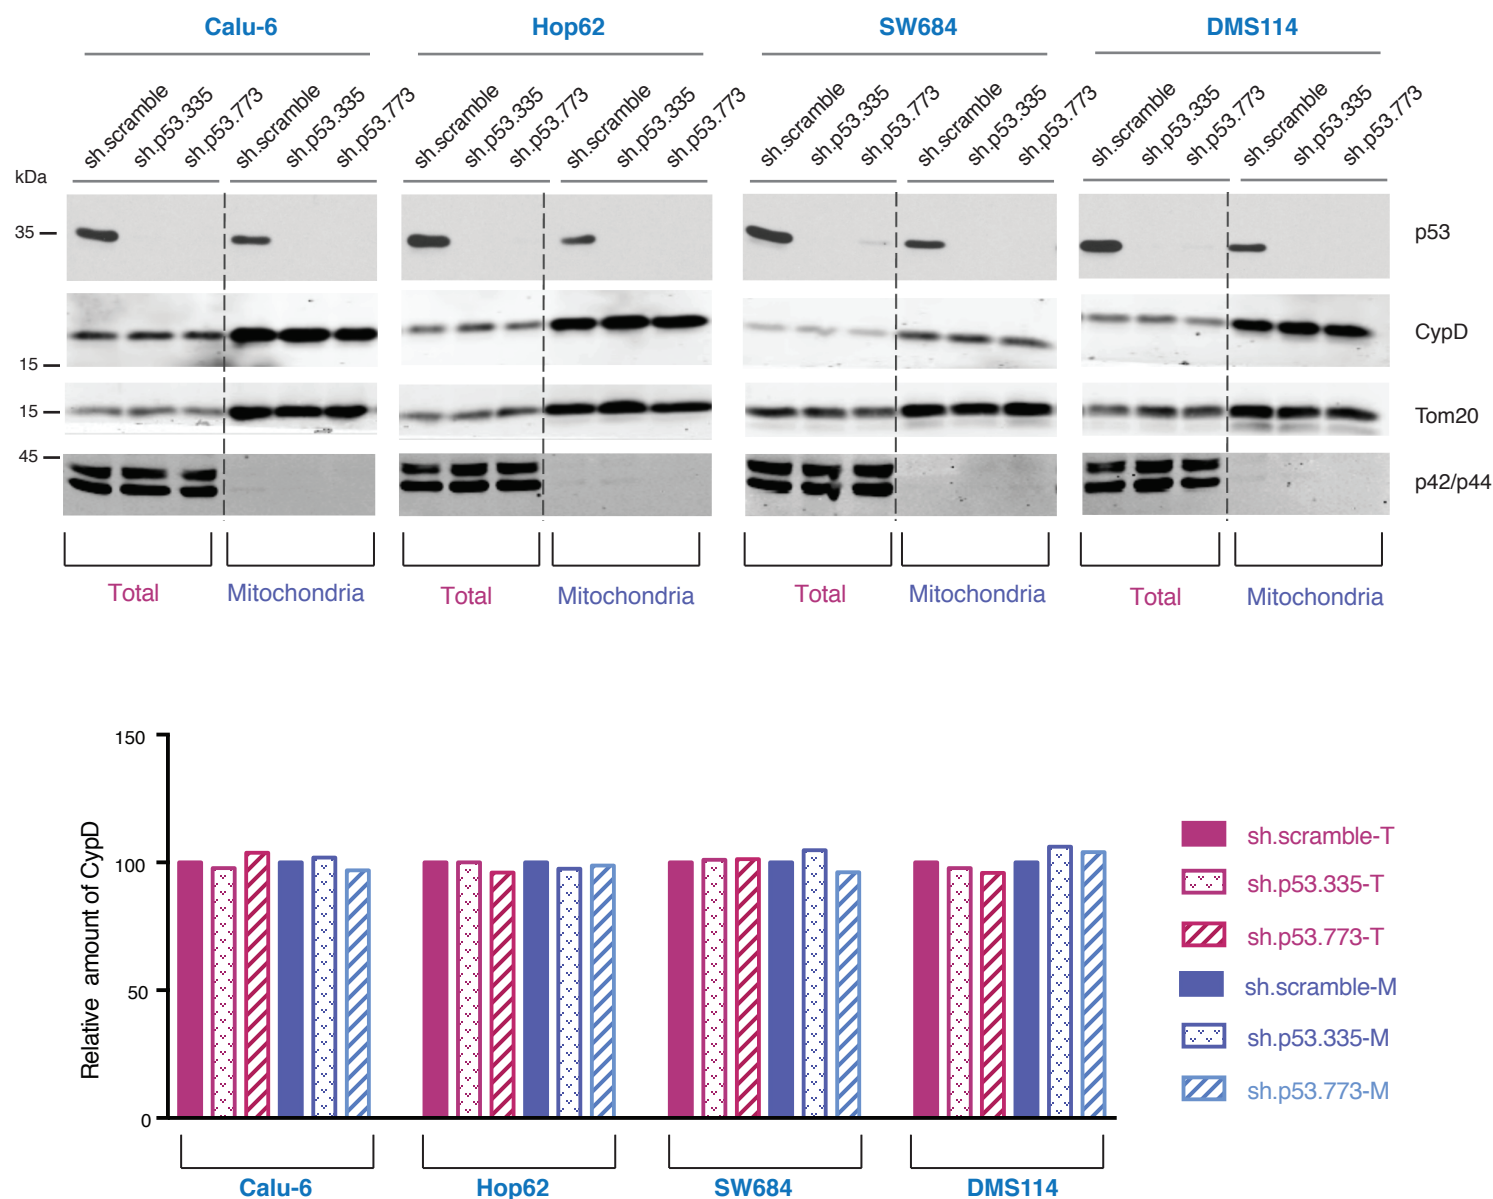

**Figure 4- figure supplement 6.**

**Knockdown of p53 exon-6 truncations and p53-psi does not affect the expression and localization of CypD.**

A. Western blot analysis (top panel) of total cell extracts and mitochondria fractions of the indicated cell lines. P53 was silenced by shRNA-mediated knockdown with two independent targeting lentiviral constructs. Purity of mitochondrial fractions were confirmed by immuno-blot analysis with antibodies targeting the Tom20 mitochondrial protein and the p42/44 MAPK cytosolic proteins. In the lower panel, the chart depicts quantification of the relative amount of CypD in the total (purple hues) and mitochondria fractions (blue hues) of the indicated cell lines. Levels of intensity of each CypD and Tom20 bands were quantified using the imageJ software, represented as a ratio of CypD to Tom20 and normalized to levels detected in sh.scramble samples, T= total cell lysate and M= mitochondrial lysate.
