# Supplementary material for: TP53 exon-6 truncating mutations produce separation of function isoforms with pro-tumorigenic functions
Source: eLife journal article supplement (doi:10.7554/elife.17929), 2016-10-19
Supplement: supp [file elife-17929-supp-v2.zip]

**A**

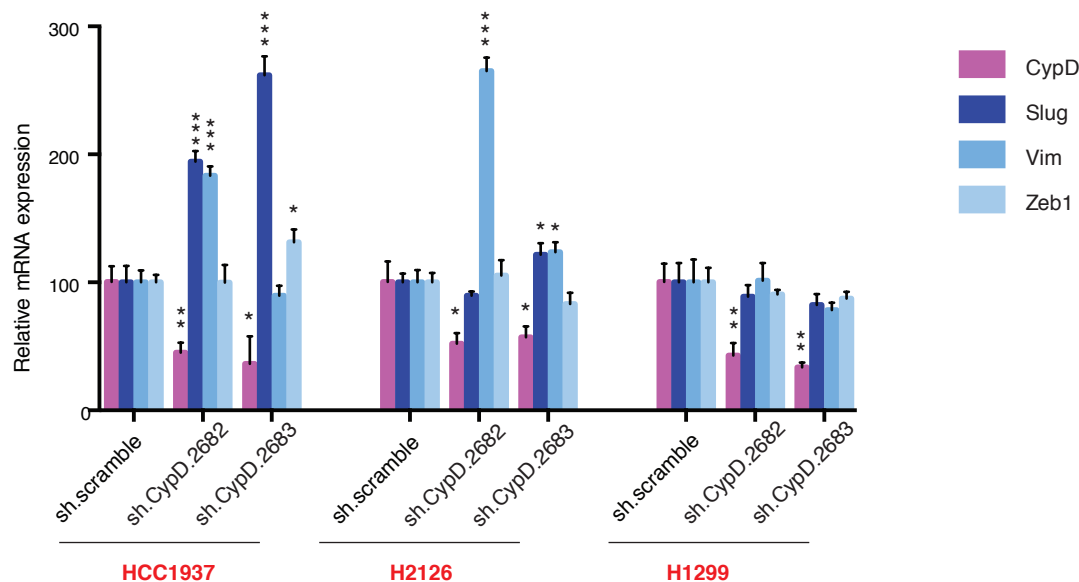

**B**

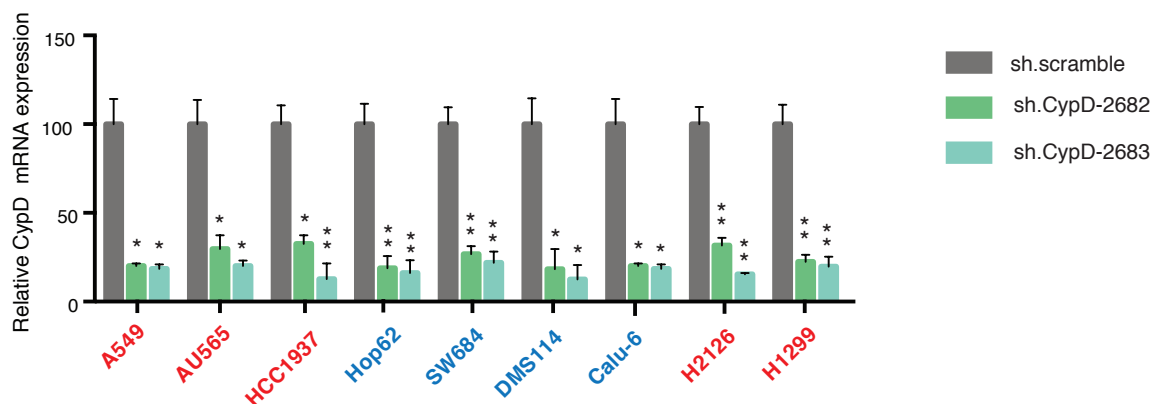

**Figure 5- figure supplement 1.**

**Differential expression of indicated genes and knockdown efficiency of CypD shRNAs.**

A. The chart represents mRNA expression analysis of the indicated genes in HCC1937, H2126 and H1299 cell lines. mRNA expression was quantified by SYBR-green based RT-qPCR. Each bar is the average of 3 replicates and represents mRNA expression of the indicated genes relative to GAPDH (p-value, \* $<0.05$ , \*\* $<0.005$  and \*\*\* $<0.0005$  unpaired t-test).

B. The chart represents the knockdown efficiency of two CypD shRNAs in indicated cell lines at 96h post infection. mRNA expression was quantified by SYBR-green based RT-qPCR. Each bar is the average of 3 replicates and represents mRNA expression of the indicated genes relative to GAPDH (p-value, \* $<0.005$  and \*\* $<0.0005$  unpaired t-test).
