# Supplementary material for: TP53 exon-6 truncating mutations produce separation of function isoforms with pro-tumorigenic functions
Source: eLife journal article supplement (doi:10.7554/elife.17929), 2016-10-19
Supplement: supp [file elife-17929-supp-v2.zip]

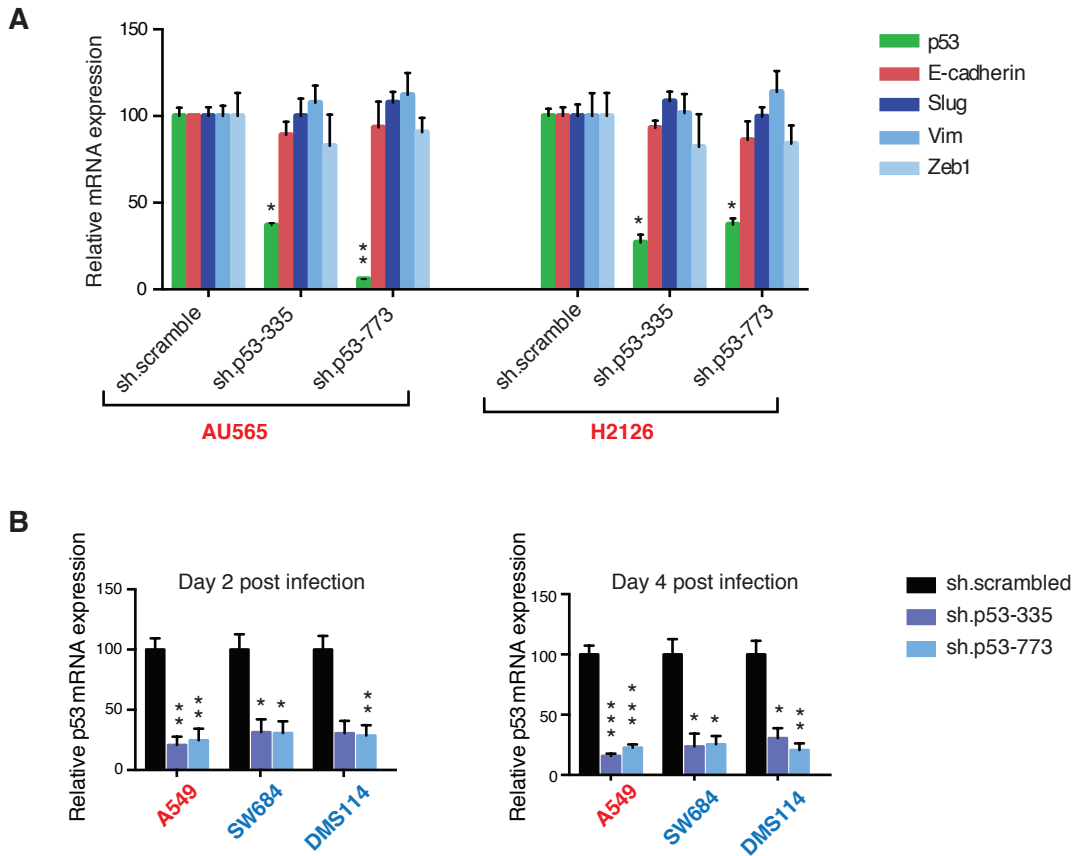

**Figure 3- figure supplement 4.**

**Differential expression of indicated genes and knockdown efficiency of indicated p53 shRNAs.**

A. The chart represents mRNA expression analysis of the indicated genes in AU565 and H2126 cell lines. mRNA expression was quantified by SYBR-green-based RT-qPCR. Each bar is the average of 3 replicates and represents mRNA expression of the indicated gene relative to GAPDH. (p-value, \* $<0.005$  and \*\* $<0.0005$ , unpaired t-test).

B. p53 knockdown efficiency upon infection with two independent shRNAs at indicated times in A549, SW684 and DMS114 cell lines. Each bar is the average of 3 replicates and represents p53 mRNA expression relative to GAPDH. (p-value, \* $<0.005$  and \*\* $<0.0005$ , unpaired t-test).
