# Supplementary material for: TP53 exon-6 truncating mutations produce separation of function isoforms with pro-tumorigenic functions
Source: eLife journal article supplement (doi:10.7554/elife.17929), 2016-10-19
Supplement: supp [file elife-17929-supp-v2.zip]

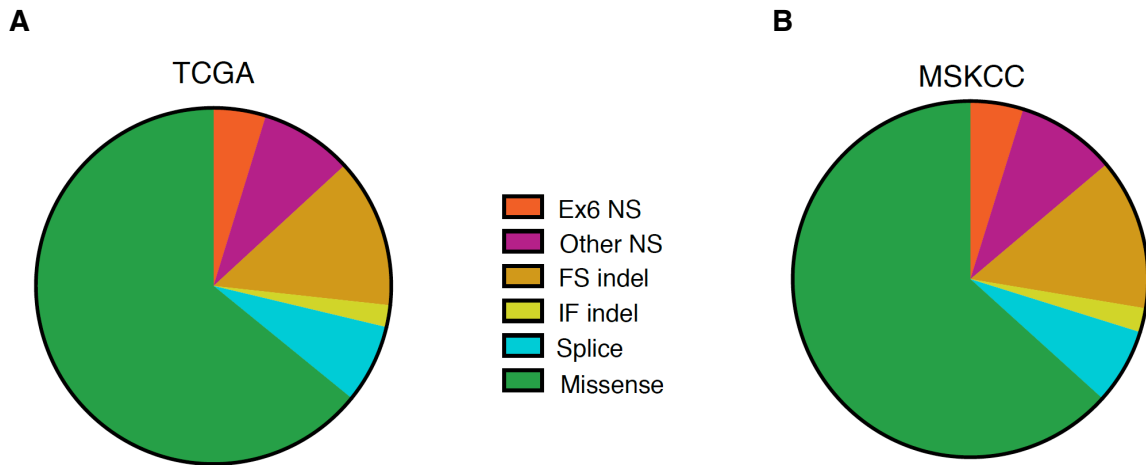

**Figure 1- figure supplement 1.**

**Distribution of *TP53* somatic mutations across multiple tumor types based on TCGA and MSKCC data set analysis.**

A. Pie chart shows distribution of indicated somatic mutations in *TP53* based on TCGA data. For more information, see supplementary file 1.

B. Pie chart shows distribution of indicated somatic mutations in *TP53* based on MSK-IMPACT data (Cheng et al., 2015).
