# Supplementary material for: TP53 exon-6 truncating mutations produce separation of function isoforms with pro-tumorigenic functions
Source: eLife journal article supplement (doi:10.7554/elife.17929), 2016-10-19
Supplement: supp [file elife-17929-supp-v2.zip]

A

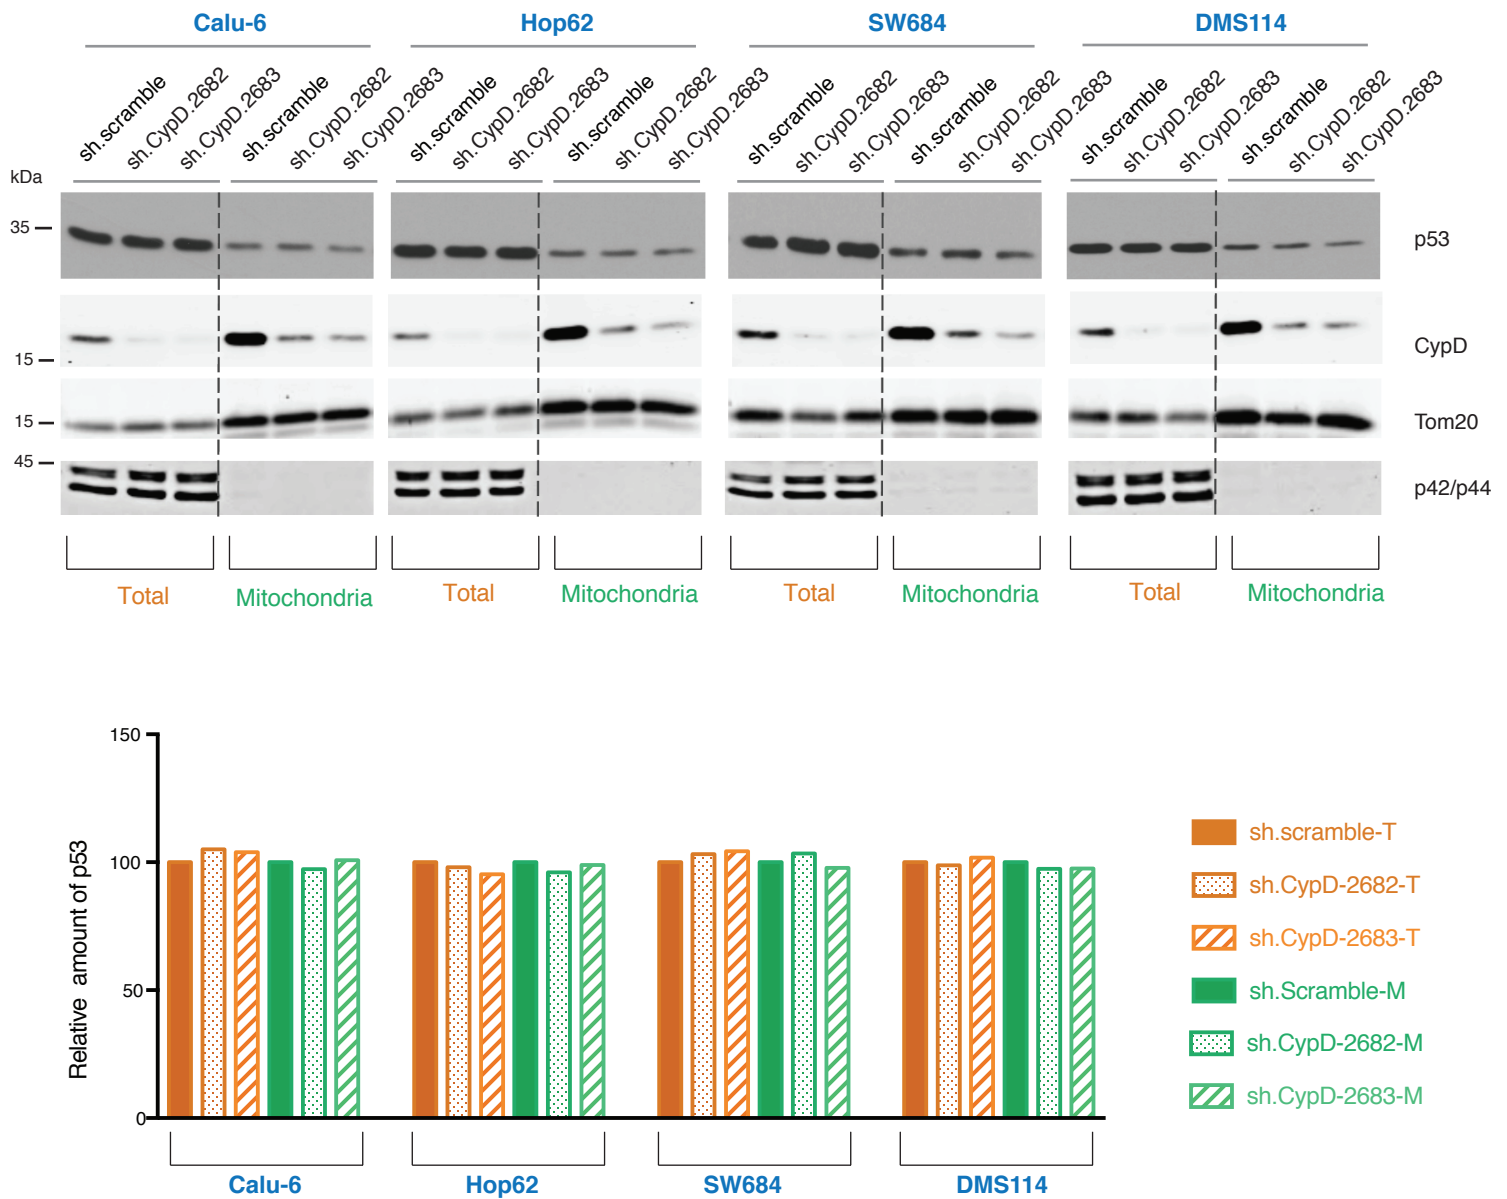

Figure 4- figure supplement 7.

**Knockdown of CypD does not affect the expression and localization of mutant p53 isoforms.**

A. Western blot analysis (top panel) of total cell extracts and mitochondria fractions of the indicated cell lines. CypD was silenced by shRNA-mediated knockdown with two independent targeting lentiviral constructs. Purity of mitochondrial fractions were confirmed by immuno-blot analysis with antibodies targeting the Tom20 mitochondrial protein and the p42/44 MAPK cytosolic proteins. In the lower panel, the chart depicts quantification of the relative amount of p53 in the total (orange hues) and mitochondria fractions (green hues) of the indicated cell lines. Levels of intensity of each p53 and Tom20 bands were quantified using the imageJ software, represented as a ratio of p53 to Tom20 and normalized to levels detected in sh.scramble samples, T= total cell lysate and M= mitochondrial lysate.
