# Supplementary material for: TP53 exon-6 truncating mutations produce separation of function isoforms with pro-tumorigenic functions
Source: eLife journal article supplement (doi:10.7554/elife.17929), 2016-10-19
Supplement: supp [file elife-17929-supp-v2.zip]

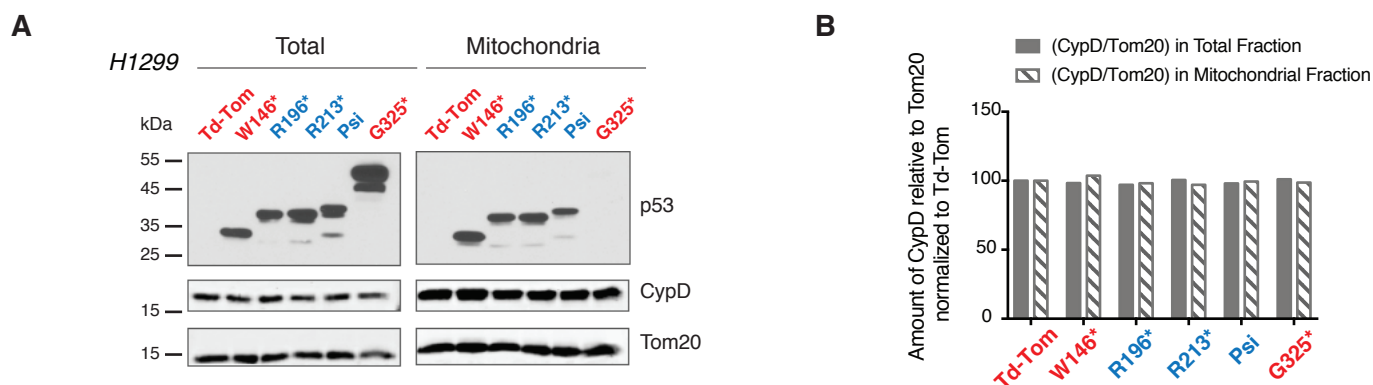

**Figure 4- figure supplement 2.**

**p53-psi and p53 exon-6 truncations localize to mitochondria without affecting expression and localization of CypD.**

A. Western blot analysis of H1229 cells expressing different p53 truncations and their localization in mitochondria shown by p53 N-terminal specific (DO1) antibody. Ectopic expression of these truncations does not affect CypD expression and localization in mitochondria shown by CypD specific antibody. Tom20 was used as loading control for total as well as mitochondrial fraction. These fractions were further used for co-immunoprecipitation experiment shown in Figure 4E.

B. This chart represents the ratio of amount of CypD to Tom20 (arbitrary units) in total and mitochondrial fraction of different p53 truncating expressing cells relative to Td-Tom expressing cells.
