# Supplementary material for: TP53 exon-6 truncating mutations produce separation of function isoforms with pro-tumorigenic functions
Source: eLife journal article supplement (doi:10.7554/elife.17929), 2016-10-19
Supplement: supp [file elife-17929-supp-v2.zip]

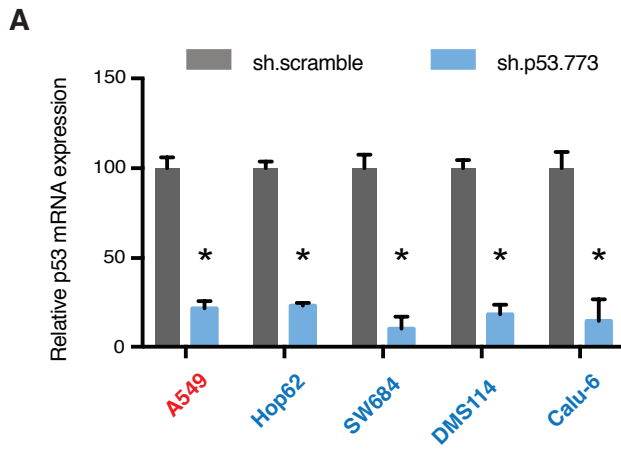

**Figure 4- figure supplement 5.**

**Knockdown efficiency upon infection with shRNA targeting p53.**

A. mRNA expression was quantified by SYBR-green based RT-qPCR in the indicated cell lines 96h post infection. Each bar is the average of 3 replicates and represents mRNA expression of the indicated gene relative to GAPDH (p-value,  $* < 0.05$ , unpaired t-test).
