# Supplementary material for: TP53 exon-6 truncating mutations produce separation of function isoforms with pro-tumorigenic functions
Source: eLife journal article supplement (doi:10.7554/elife.17929), 2016-10-19
Supplement: supp [file elife-17929-supp-v2.zip]

**A**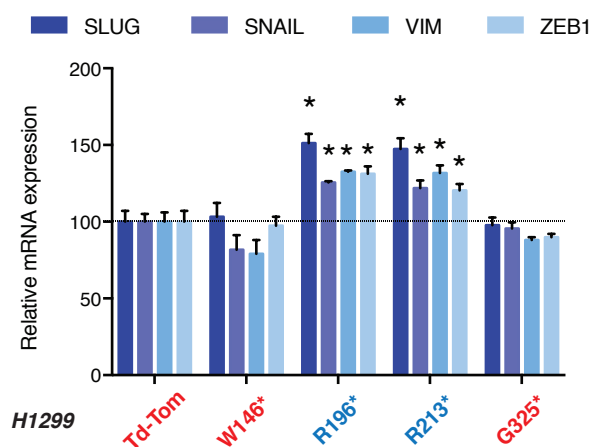

**Figure 2- figure supplement 3.**

**p53 exon-6 truncations increase expression of mesenchymal marker.**

A. RT-qPCR analysis of EMT markers in H1299 cells expressing different p53 truncations. mRNA expression was quantified by SYBR-green-based RT-qPCR. Each bar is the average of 3 replicates and represents mRNA expression of the indicated genes relative to GAPDH (p-value  $<0.05$ , unpaired t-test).
