# Supplementary material for: TP53 exon-6 truncating mutations produce separation of function isoforms with pro-tumorigenic functions
Source: eLife journal article supplement (doi:10.7554/elife.17929), 2016-10-19
Supplement: supp [file elife-17929-supp-v2.zip]

**A**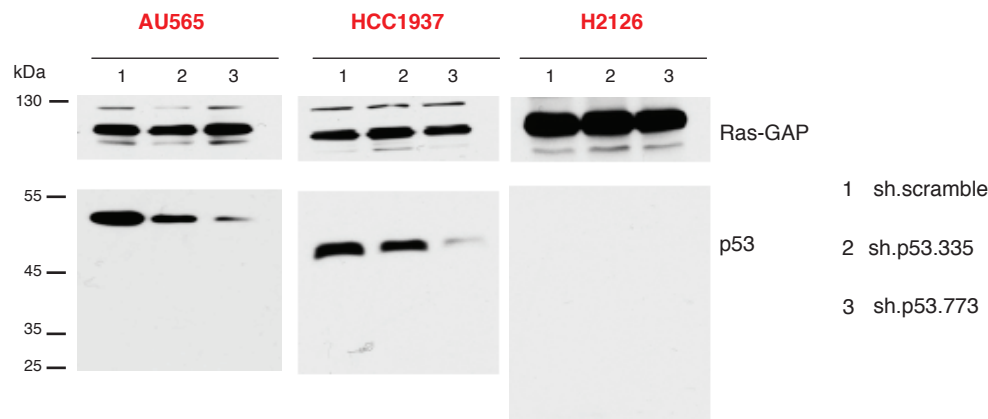**B**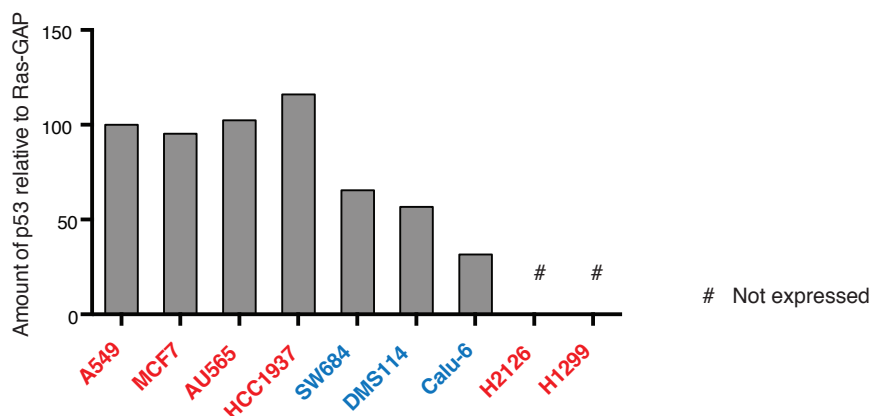**Figure 3- figure supplement 3.****Validation of p53 expression by immuno-blot and efficient knockdown with indicated p53 specific shRNA.**

A. Western blot analysis of the indicated cell lines using a p53 N-terminal specific (DO1) antibody and an antibody against RasGAP as loading control.

B. Quantification of levels of p53 protein expression in multiple cell lines. Cell extracts were analyzed by western blot analysis with the p53 N-terminal specific (DO1) antibody and RASGAP as a loading control. ImageJ was used to determine signal intensity of the bands. The values were then indicated as ratio of amount of p53 to RasGAP (in arbitrary units) relative to amount in A549 (p53-WT) cells.
