# Supplementary material for: TP53 exon-6 truncating mutations produce separation of function isoforms with pro-tumorigenic functions
Source: eLife journal article supplement (doi:10.7554/elife.17929), 2016-10-19
Supplement: supp [file elife-17929-supp-v2.zip]

**A**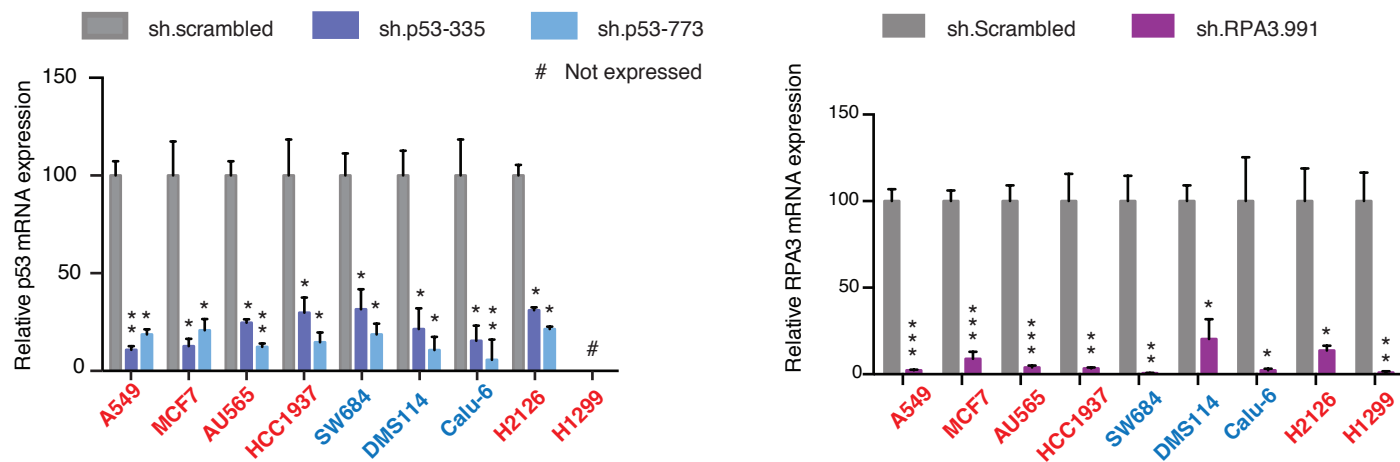**Figure 3- figure supplement 5.****Knockdown efficiency of indicated shRNAs in following cell lines.**

A. Knockdown efficiency of p53 and RPA3 upon shRNA infection in the indicated cell lines at 96h after infection. Each bar is the average of 3 replicates and represents mRNA expression of the indicated gene relative to GAPDH. (p-value, \* $<0.005$ , \*\* $<0.0005$  and \*\*\* $<0.00005$ , unpaired t-test). The sequence for each shRNA used in this study, is indicated in Supplementary File 4.
