# Supplementary material for: TP53 exon-6 truncating mutations produce separation of function isoforms with pro-tumorigenic functions
Source: eLife journal article supplement (doi:10.7554/elife.17929), 2016-10-19
Supplement: supp [file elife-17929-supp-v2.zip]

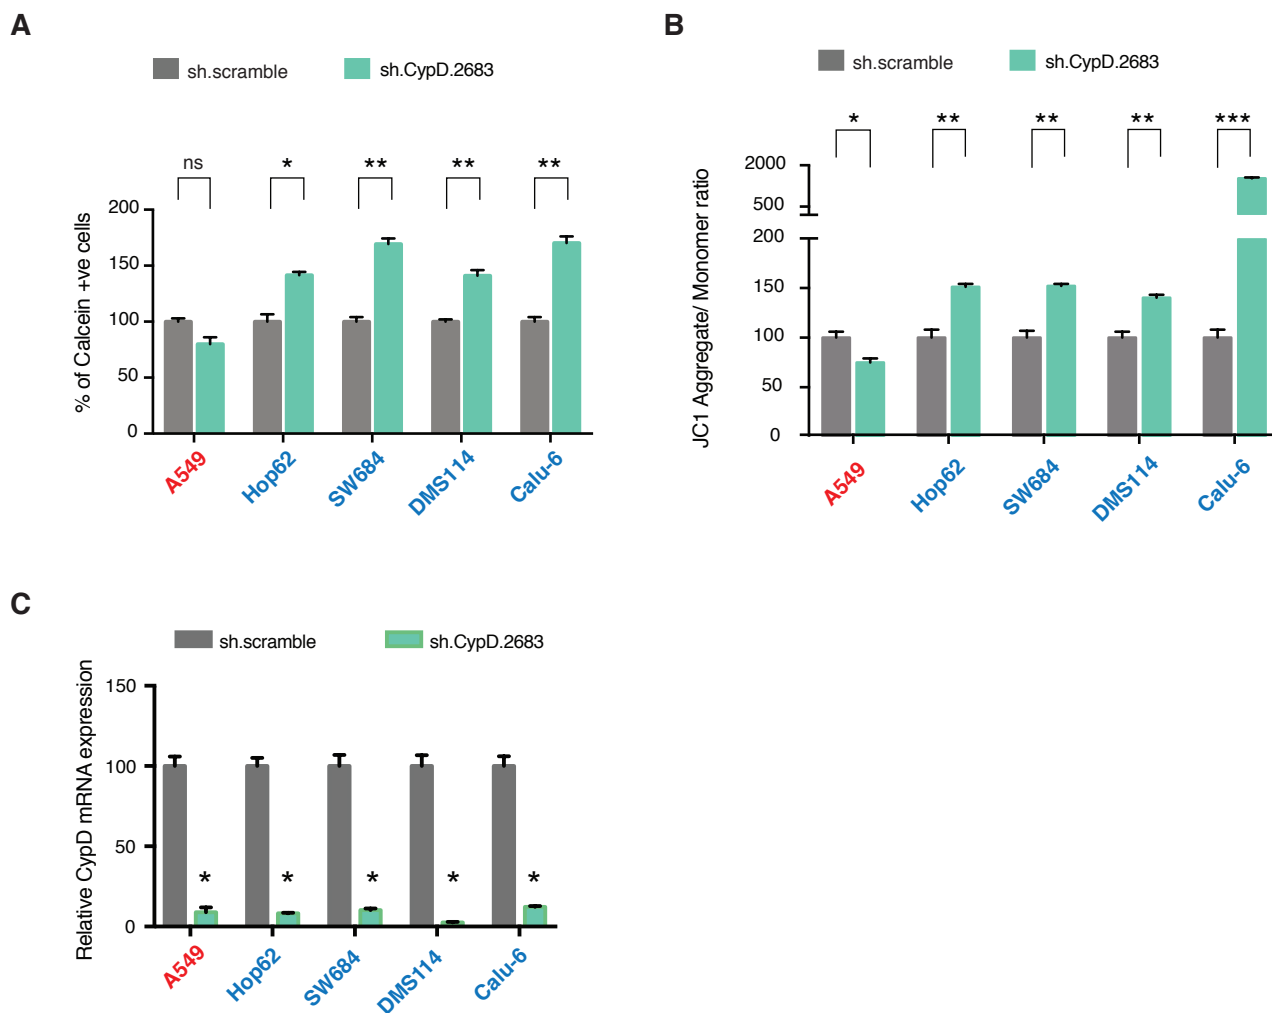

**Figure 4- figure supplement 4.**

**p53-psi and p53 exon-6 truncations regulate MPTP and mitochondrial polarization in CypD dependent manner.**

A. The chart represents the percentage of cells retaining calcein in mitochondria upon CoCl<sub>2</sub> treatment. Each column is the average of 3 independent experiments and indicates the mean percentage of calcein positive cells relative to scramble shRNA for each cell lines with standard deviation (n=3, p-value \* $<0.005$  and \*\* $<0.0005$ , unpaired t-test). *TP53* mutation status for the cell lines utilized in this study is indicated on the right.

B. The chart indicates the ratio of J aggregate relative to monomer in the indicated cells after p53 knockdown with a p53 shRNA lentiviral construct relative to scrambled shRNA. Note the increase in the number of J aggregates (increased mitochondrial polarization) upon p53 knockdown in cells harboring p53-psi or p53 exon-6 truncating mutations (n=3, p-value \* $<0.0005$ , \*\* $<0.00005$  and \*\*\* $<0.000005$ , unpaired t-test).

C. The chart represents the knockdown efficiency upon infection with shRNA targeting CypD in indicated cell lines 96h after infection. mRNA expression was quantified by SYBR-green based RT-qPCR. Each bar is the average of 3 replicates and represents mRNA expression of the indicated gene relative to GAPDH (p-value, \* $<0.05$ , unpaired t-test).
