# Supplementary material for: TP53 exon-6 truncating mutations produce separation of function isoforms with pro-tumorigenic functions
Source: eLife journal article supplement (doi:10.7554/elife.17929), 2016-10-19
Supplement: supp [file elife-17929-supp-v2.zip]

**A**

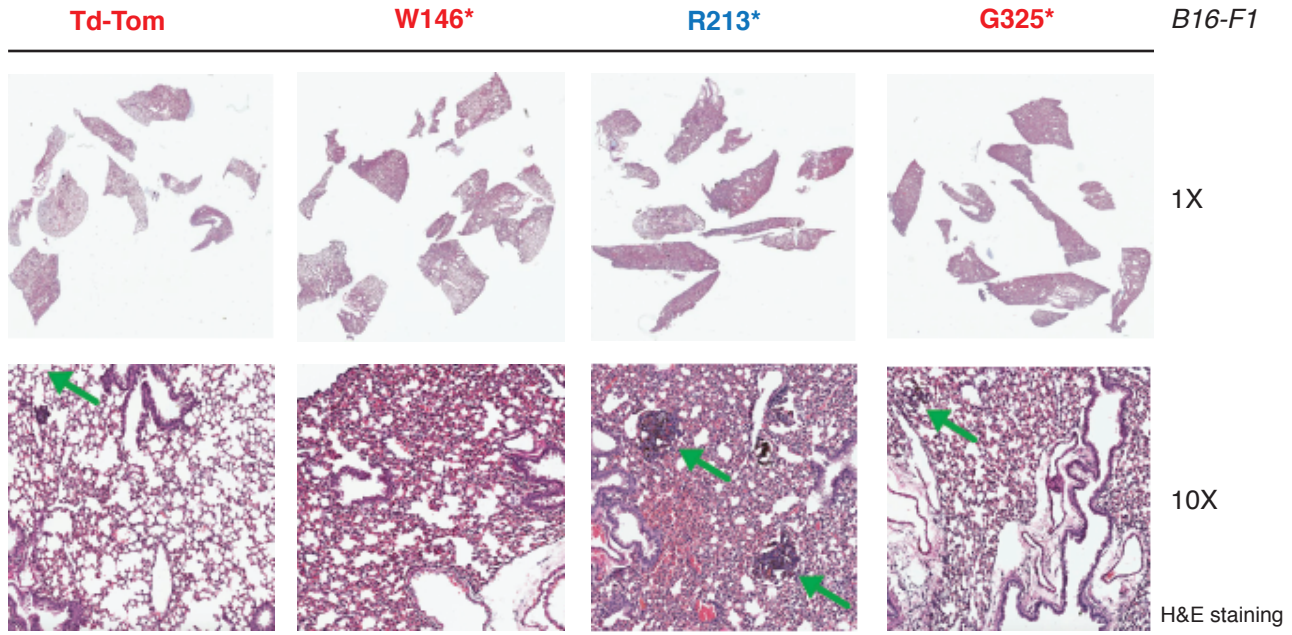

**Figure 2- figure supplement 4.**

**p53 exon-6 truncation increases the colonization of melanoma cells in lung.**

A. Representative Hematoxylin and Eosin staining of mice lung sections dissected from mice injected with B16-F1 cells expressing different p53 truncations via tail vein. Green arrow indicates the melanoma colonies.
