# Supplementary material for: TP53 exon-6 truncating mutations produce separation of function isoforms with pro-tumorigenic functions
Source: eLife journal article supplement (doi:10.7554/elife.17929), 2016-10-19
Supplement: supp [file elife-17929-supp-v2.zip]

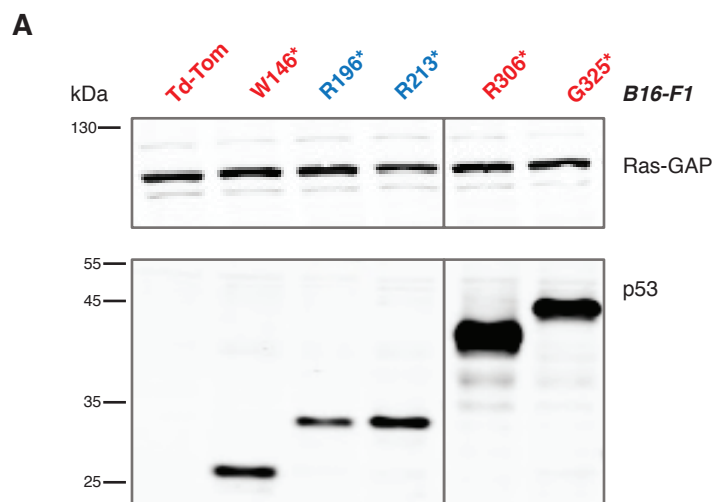

**Figure 2- figure supplement 2.**

**Lentiviral ectopic expression of different p53 truncations.**

A. Western blot analysis of B16-F1 cells ectopically expressing different p53 truncating mutations using antibodies specific for p53 N-terminal specific (DO1) antibody and RasGAP as loading control.
