# Supplementary material for: TP53 exon-6 truncating mutations produce separation of function isoforms with pro-tumorigenic functions
Source: eLife journal article supplement (doi:10.7554/elife.17929), 2016-10-19
Supplement: supp [file elife-17929-supp-v2.zip]

A

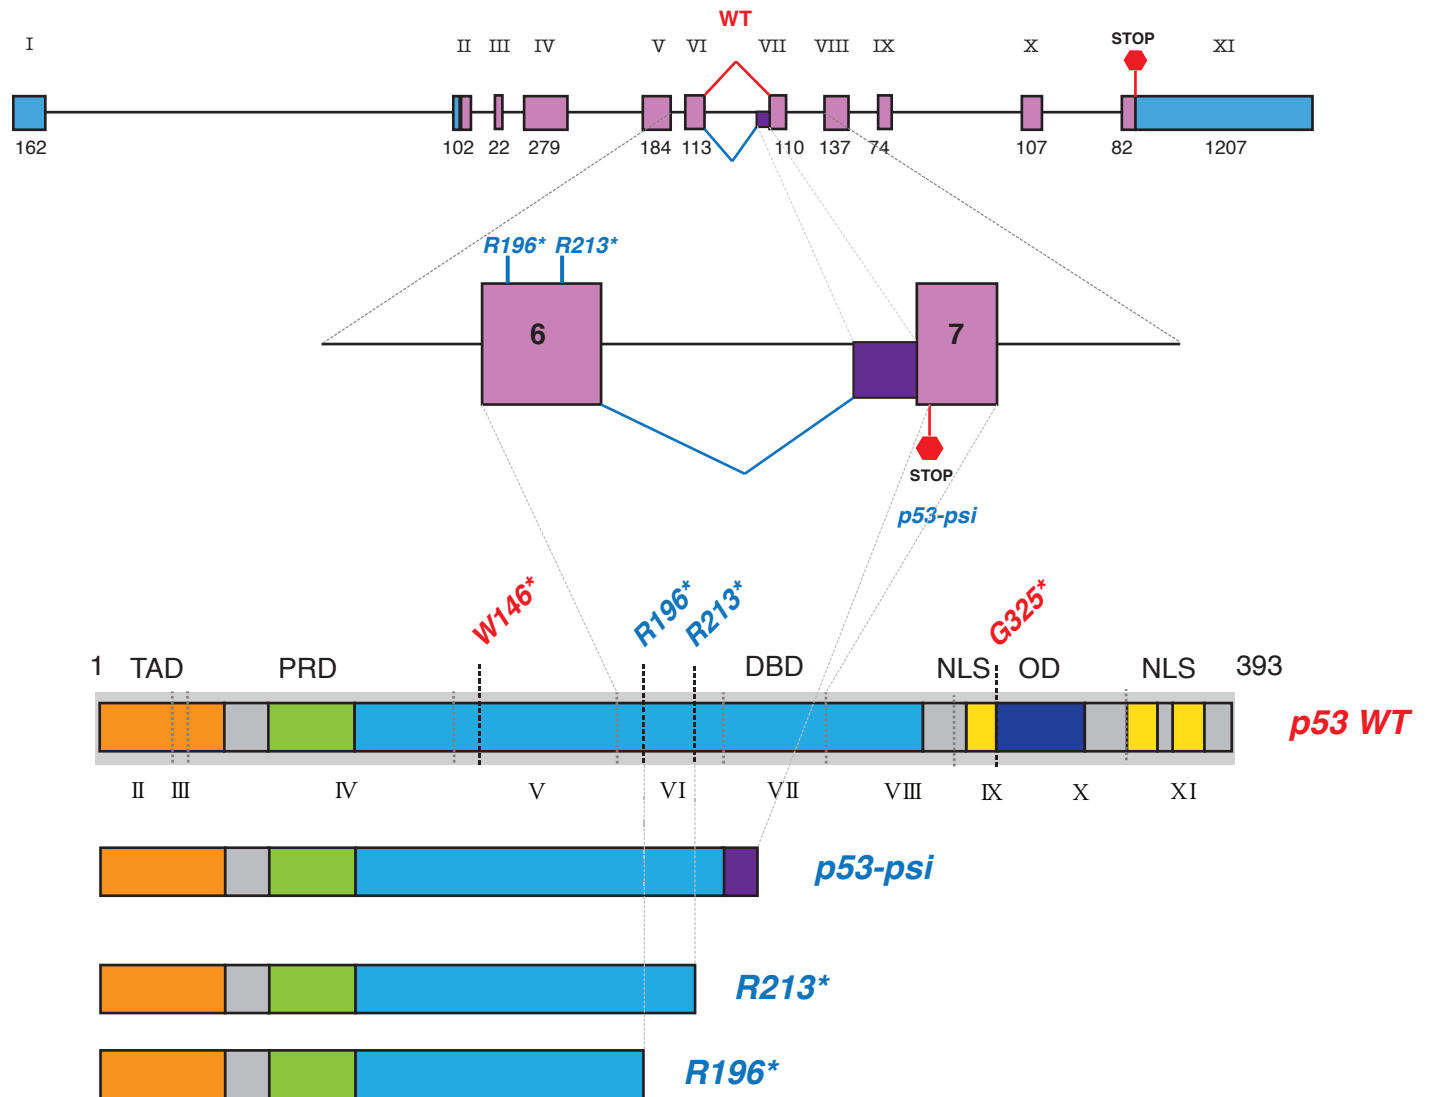

Figure 4- figure supplement 1.

**p53-psi molecularly resembled *TP53* exon-6 truncating mutations.**

A. Schematic representation of normal splicing as well as alternative splicing event in *TP53* generating p53-WT and p53-psi as indicated. Lower panel schematic shows structural similarity between p53-psi protein and p53 exon-6 truncations. Each exon in *TP53* is indicated with Roman numerals.
