# Supplementary material for: TP53 exon-6 truncating mutations produce separation of function isoforms with pro-tumorigenic functions
Source: eLife journal article supplement (doi:10.7554/elife.17929), 2016-10-19
Supplement: supp [file elife-17929-supp-v2.zip]

A

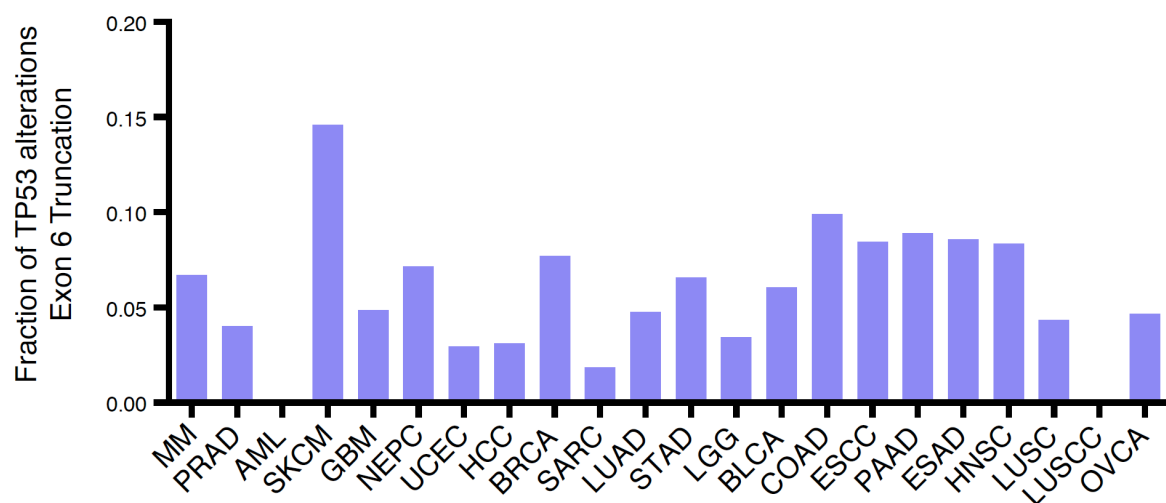

Figure 1- figure supplement 3.

***TP53* exon-6 truncating mutations are distributed at different frequency in different tumors.**

A. Fraction of *TP53* exon-6 truncating mutations in the indicated tumor types.
