# Supplementary material for: TP53 exon-6 truncating mutations produce separation of function isoforms with pro-tumorigenic functions
Source: eLife journal article supplement (doi:10.7554/elife.17929), 2016-10-19
Supplement: supp [file elife-17929-supp-v2.zip]

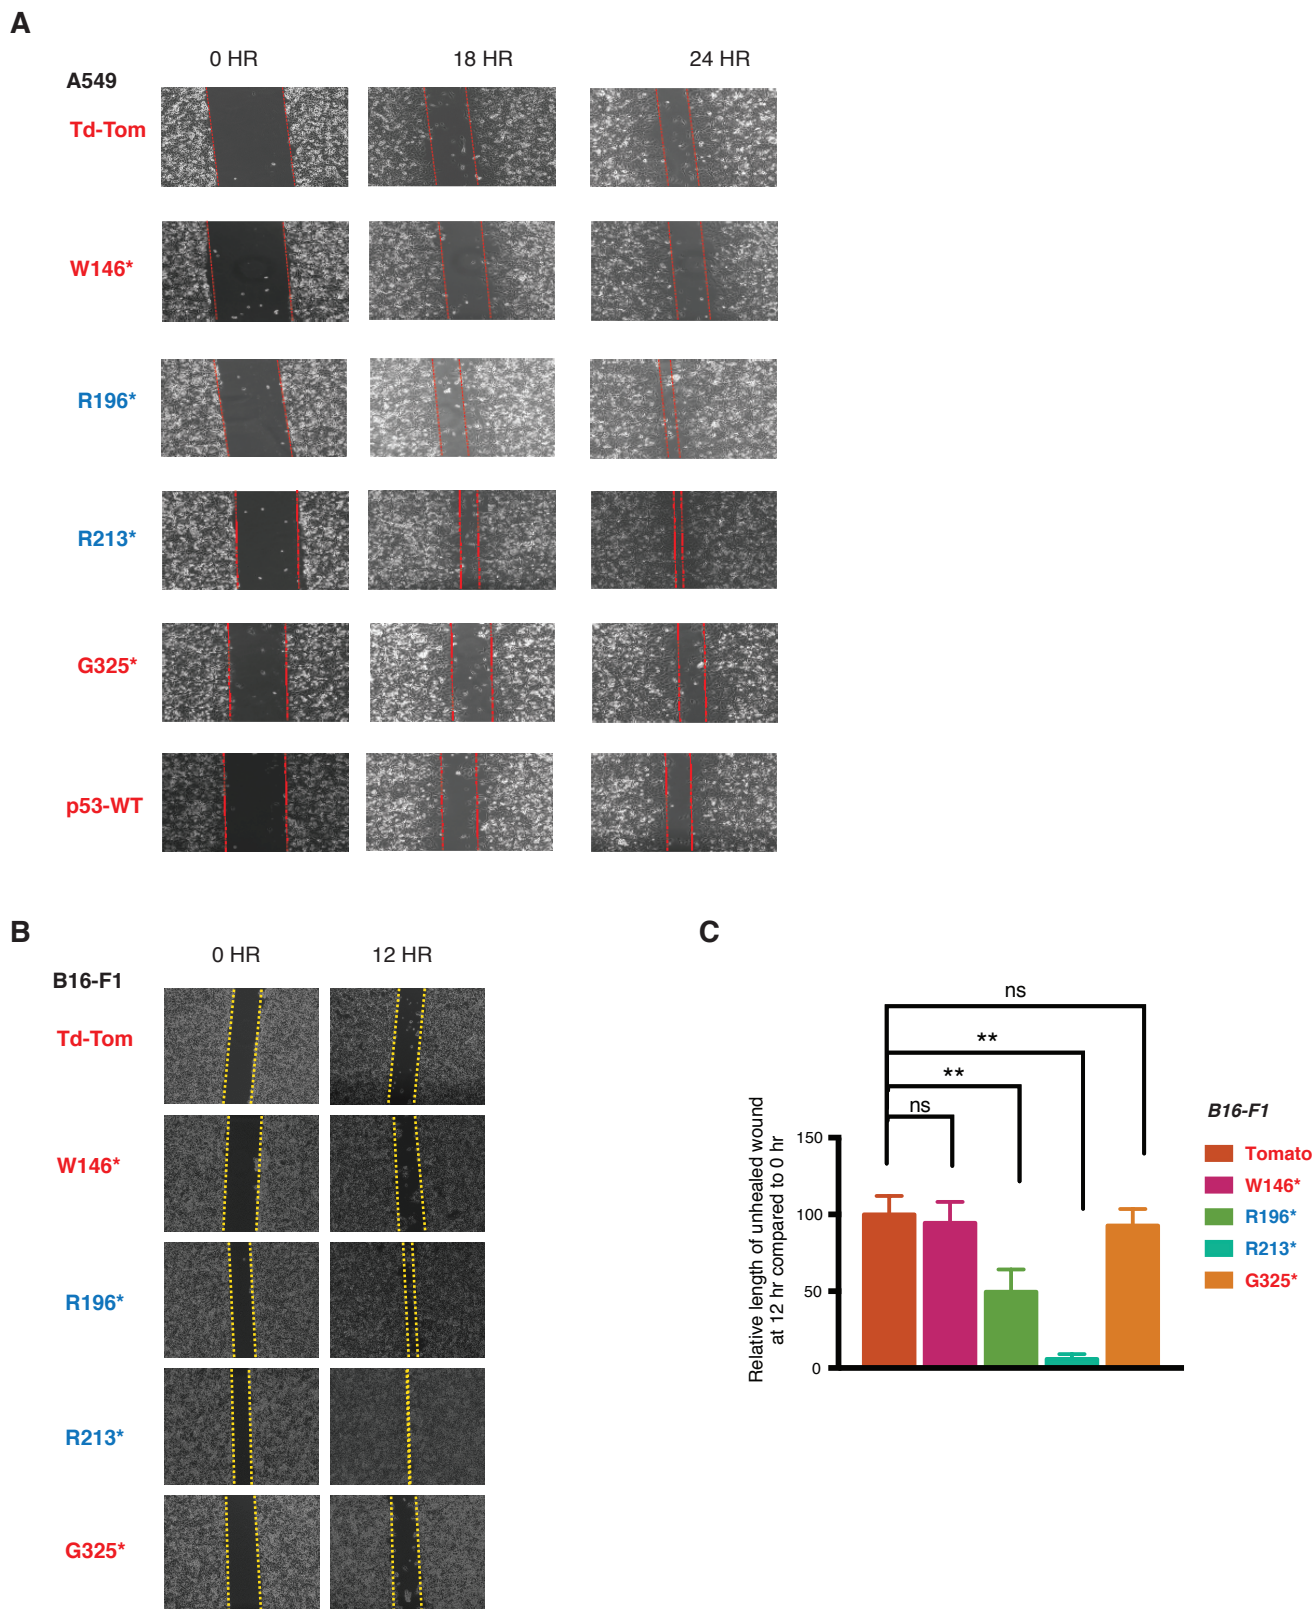

**Figure 2- figure supplement 1.**

### p53 exon-6 truncations increase cell migration.

A. Representative images of A549 cells ectopically expressing different p53 truncations and p53-WT shown at indicated time points post scratch (40X). The boundary lines of scratch are indicated by dotted red line. Cell migration was assessed by recovery of the scratch.

B. Representative images of B16-F1 cells ectopically expressing different p53 truncations at indicated time points post scratch (40X). The boundary lines of scratch are indicated by dotted yellow line. Cell migration was assessed by recovery of the scratch.

C. The chart depicts the relative length of each wounds (mean ± SD of 8 wounds) at 12hrs compared to 0hr in B16-F1 cells (n=8, p-value \*\*<0.0005, unpaired t-test).
