# Supplementary material for: TP53 exon-6 truncating mutations produce separation of function isoforms with pro-tumorigenic functions
Source: eLife journal article supplement (doi:10.7554/elife.17929), 2016-10-19
Supplement: supp [file elife-17929-supp-v2.zip]

Archive with 28 entries (28 files):
- elife_poa_e17929_Figure_2_figure_supplement_4.pdf
- elife_poa_e17929_Figure_1_figure_supplement_2.pdf
- elife_poa_e17929_Figure_4_figure_supplement_2.pdf
- elife_poa_e17929_Figure_4_figure_supplement_7.pdf
- elife_poa_e17929_Supplementary_File_2.xlsx
- elife_poa_e17929_Figure_3_figure_supplement_2.pdf
- elife_poa_e17929_Figure_4_figure_supplement_6.pdf
- elife_poa_e17929_Figure_3_figure_supplement_1.pdf
- elife_poa_e17929_Figure_2_figure_supplement_2.pdf
- elife_poa_e17929_Figure_3_figure_supplement_6.pdf
- elife_poa_e17929_Figure_4_figure_supplement_4.pdf
- elife_poa_e17929_Figure_3_figure_supplement_4.pdf
- elife_poa_e17929_Supplementary_File_5.docx
- elife_poa_e17929_Figure_1_figure_supplement_3.pdf
- elife_poa_e17929_Supplementary_File_4.docx
- elife_poa_e17929_Figure_3_figure_supplement_3.pdf
- elife_poa_e17929_Figure_2_figure_supplement_1.pdf
- elife_poa_e17929_Figure_2_figure_supplement_3.pdf
- elife_poa_e17929_Supplementary_File_1.xlsx
- elife_poa_e17929_Figure_4_figure_supplement_5.pdf
- elife_poa_e17929_Figure_5_figure_supplement_1.pdf
- elife_poa_e17929_Figure_3_figure_supplement_7.pdf
- elife_poa_e17929_Figure_4_figure_supplement_3.pdf
- elife_poa_e17929_Supplementary_File_3.docx
- elife_poa_e17929_Figure_5_figure_supplement_2.pdf
- elife_poa_e17929_Figure_3_figure_supplement_5.pdf
- elife_poa_e17929_Figure_4_figure_supplement_1.pdf
- elife_poa_e17929_Figure_1_figure_supplement_1.pdf
