# Supplementary material for: TP53 exon-6 truncating mutations produce separation of function isoforms with pro-tumorigenic functions
Source: eLife journal article supplement (doi:10.7554/elife.17929), 2016-10-19
Supplement: supp [file elife-17929-supp-v2.zip › elife_poa_e17929_Figure_1_figure_supplement_2.pdf]

**A**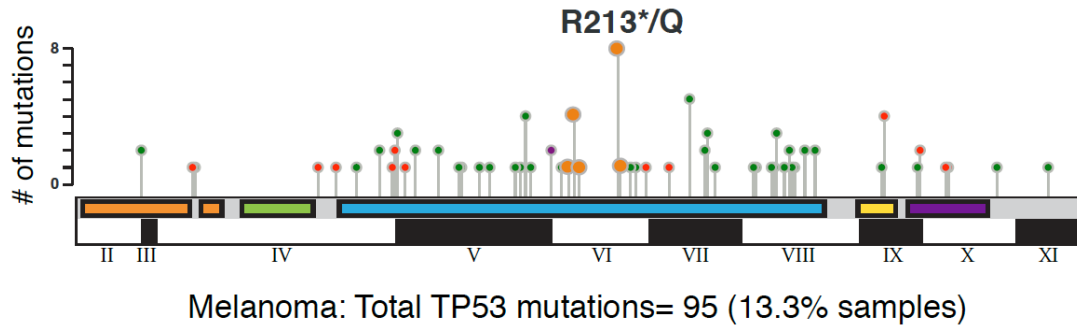**B**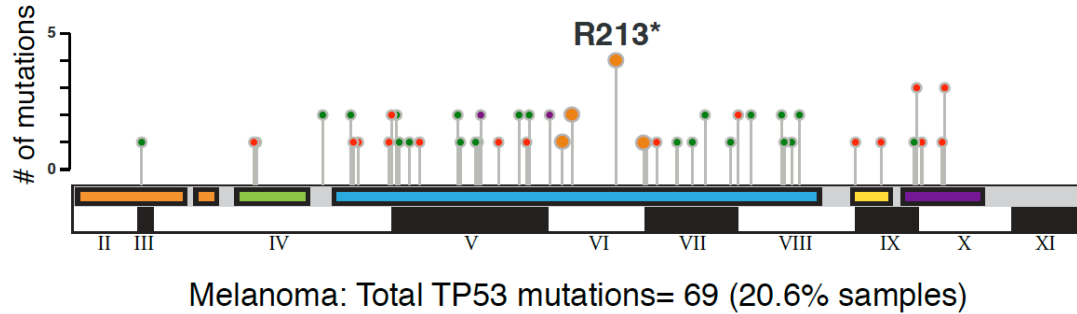

**Figure 1- figure supplement 2.**

**Graphical summary of *TP53* non-synonymous mutations in melanoma in indicated studies.**

Distribution of different type somatic mutations mapped across *TP53* gene in melanoma (A) TCGA and (B) MSK-IMPACT. Circles are colored with respect to the corresponding mutation types as follows: Missense Mutations- green; Truncating Mutations (Nonsense, Nonstop, Frameshift deletion, Frameshift insertion, Splice site)-orange; Inframe Mutations (Inframe deletion, Inframe insertion).
