# Supplementary material for: TP53 exon-6 truncating mutations produce separation of function isoforms with pro-tumorigenic functions
Source: eLife journal article supplement (doi:10.7554/elife.17929), 2016-10-19
Supplement: supp [file elife-17929-supp-v2.zip › elife_poa_e17929_Figure_3_figure_supplement_1.pdf]

**A**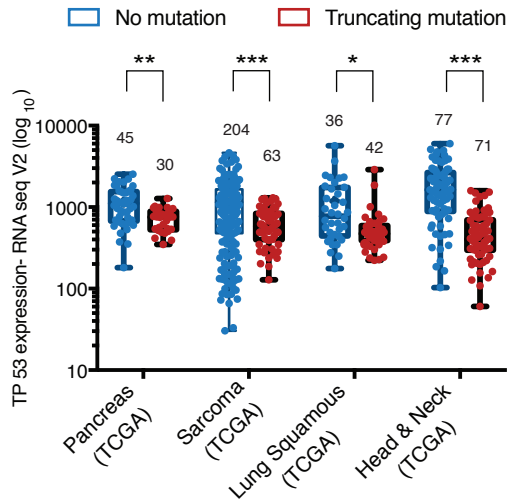

**Figure 3- figure supplement 1.**

**The P53 mRNA expression is comparable between p53-WT and p53 truncations.**

A. The chart represents the distribution of TP53 mRNA expression in the indicated tumors based on analysis of TCGA data sets. Each dot represents one individual tumor and number of tumor samples for each group is indicated on each tumor type. p-value for Pancreas, Sarcoma, Lung Squamous and Head and neck tumors are 0.0001684, 3.18365E-06, 0.001551394 and 1.2E-14 respectively. See Supplementary File 2 for further details.
