# Supplementary material for: TP53 exon-6 truncating mutations produce separation of function isoforms with pro-tumorigenic functions
Source: eLife journal article supplement (doi:10.7554/elife.17929), 2016-10-19
Supplement: supp [file elife-17929-supp-v2.zip › elife_poa_e17929_Figure_3_figure_supplement_2.pdf]

**A**

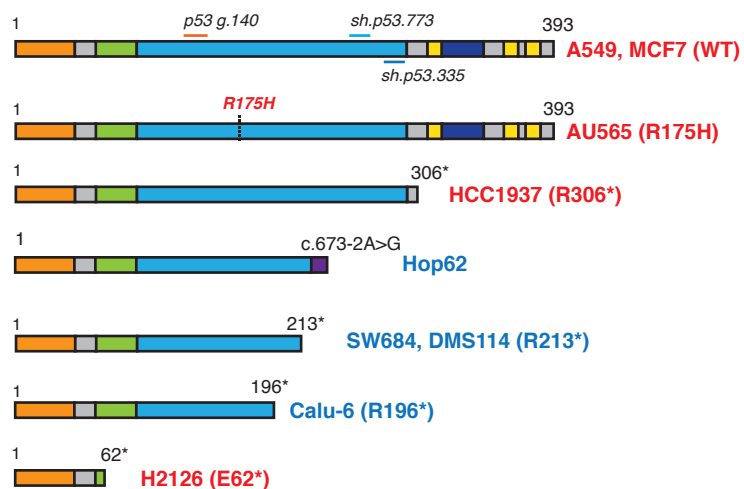

**Figure 3- figure supplement 2.**

**Schematic of the p53-WT or truncated forms expressed in the cell lines utilized in this study**

A. Cell lines harboring *TP53* exon-6 truncating mutations or splicing mutations are indicated in blue.
