# Supplementary material for: TP53 exon-6 truncating mutations produce separation of function isoforms with pro-tumorigenic functions
Source: eLife journal article supplement (doi:10.7554/elife.17929), 2016-10-19
Supplement: supp [file elife-17929-supp-v2.zip › elife_poa_e17929_Figure_3_figure_supplement_6.pdf]

**A**

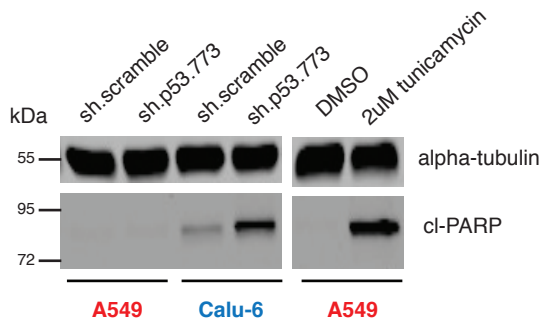

**Figure 3- figure supplement 6.**

**Knockdown of p53 induces apoptosis in cell expressing in p53 exon-6 truncation.**

A. Cleaved-PARP Western blot analysis upon p53 knockdown in A549 and Calu-6 cell lines 5 days after shRNA infection. As a positive control, A549 were treated with DMSO or 2uM tunicamycin for 72h. Alpha-tubulin was used as a loading control.
