# Supplementary material for: TP53 exon-6 truncating mutations produce separation of function isoforms with pro-tumorigenic functions
Source: eLife journal article supplement (doi:10.7554/elife.17929), 2016-10-19
Supplement: supp [file elife-17929-supp-v2.zip › elife_poa_e17929_Figure_5_figure_supplement_2.pdf]

**A**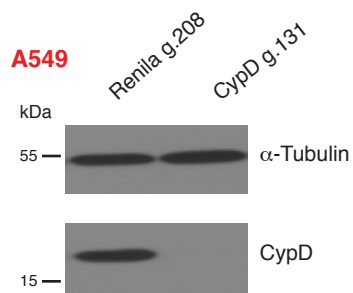**B**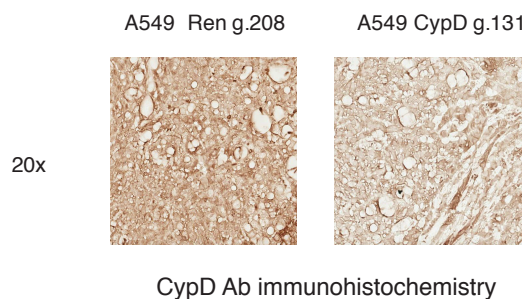

**Figure 5- figure supplement 2.**

**Inactivation of CypD by CRISPR-Cas9 in *in-vitro* and *in-vivo* systems.**

A. Western blot analysis of the indicated cell lines using a CypD specific antibody and an antibody against RasGAP as loading control.

B. Mice were injected sub-cutaneously with A549 cells, after 9 days treated with Shield-1 and sacrificed at day 16. Sections of tumors transduced either with Renila sgRNA or CypD sgRNA were stained with a CypD specific antibody. Representative pictures are shown.
