# Supplementary material for: TP53 exon-6 truncating mutations produce separation of function isoforms with pro-tumorigenic functions
Source: eLife journal article supplement (doi:10.7554/elife.17929), 2016-10-19
Supplement: supp [file elife-17929-supp-v2.zip › elife_poa_e17929_Supplementary_File_1.xlsx]

## Sheet: Sheet1
Supplementary File 1: List of tumor studies used for analysis of distribution of Missense, Exon-6 and other truncations in TP53.
Study Abbreviation	Study Name	Abbreviation	Total Cases	Number of Cases with altered p53	Fraction of Cases with altered p53	WT	Missense	Exon-6 truncations	Other truncations
AML (TCGA pub)	Acute Myeloid Leukemia (TCGA, NEJM 2013)	AML	191	16	0.084	176	11	0	5
Bladder (TCGA)	Bladder Urothelial Carcinoma (TCGA, Provisonal)	BLCA	127	66	0.52	64	56	4	14
Glioma (TCGA)	Brain Lower Grade Glioma (TCGA, Provisonal)	LGG	283	146	0.516	137	152	5	19
Breast (TCGA pub)	Breast Invasive Carcinoma (TCGA, Cell 2015)	BRCA	974	350	0.36	633	208	27	83
Colorectal (TCGA pub)	Colorectal Adenocarcinoma (TCGA, Nature 2012)	COAD	212	111	0.52	102	78	11	23
Esophagus (Broad)	Esophageal Adenocarcinoma (Broad, Nat Genet 2013)	ESAD	146	105	0.72	41	72	9	21
ESCC (UCLA 2014)	Esophageal Squamous Cell Carcinoma (UCLA, Nat Genet 2014)	ESCC	137	83	0.605	54	43	7	28
GBM (TCGA 2013)	Glioblastoma (TCGA, Cell 2013)	GBM	281	62	0.221	223	50	3	7
Head and Neck (TCGA pub)	Head and Neck Squamous Cell Carcinoma (TCGA, Nature 2015)	HNSC	279	204	0.731	75	142	17	57
Liver (TCGA)	Liver Hepatocellular Carcinoma (TCGA, Provisonal)	HCC	193	64	0.331	132	40	2	13
Lung adeno (TCGA pub)	Lung Adenocarcinoma (TCGA, Nature 2014)	LUAD	230	105	0.457	125	73	5	29
Lung squ (TCGA pub)	Lung Squamous Cell Carcinoma (TCGA, Nature 2012)	LUSC	178	162	0.91	16	103	7	42
MM (Broad)	Multiple Myeloma (Broad, Cancer Cell 2014)	MM	205	15	0.073	190	12	1	2
NEPC (Trento/Cornell/Broad 2016)	Neuroendocrine Prostate Cancer (Trento/Cornell/Broad 2016)	NEPC	107	28	0.262	81	21	2	2
Ovarian (TCGA pub)	Ovarian Serous Cystadenocarcinoma (TCGA, Nature 2011)	OVCA	316	300	0.949	17	187	14	57
Pancreas (TCGA)	Pancreatic Adenocarcinoma (TCGA, Provisonal)	PAAD	145	101	0.697	45	68	9	18
Prostate (TCGA pub)	Prostate Adenocarcinoma (TCGA, Cell 2015)	PRAD	333	25	0.075	310	13	1	5
Sarcoma (TCGA)	Sarcoma (TCGA, Provisonal)	SARC	240	108	0.45	158	49	2	18
Melanoma (TCGA)	Skin Cutaneous Melanoma (TCGA, Provisonal)	SKCM	278	48	0.173	232	30	7	8
Lung SC(UCOLOGNE)	Small Cell Lung Cancer (U Cologne, Nature 2015)	LUSCC	110	101	0.918	9	68	0	24
Stomach (TCGA pub)	Stomach Adenocarcinoma (TCGA, Nature 2014)	STAD	287	137	0.477	152	85	9	32
Uterine (TCGA pub)	Uterine Corpus Endometrioid Carcinoma (TCGA, Nature 2013)	UCEC	240	68	0.283	172	56	2	11
