# Supplementary material for: TP53 exon-6 truncating mutations produce separation of function isoforms with pro-tumorigenic functions
Source: eLife journal article supplement (doi:10.7554/elife.17929), 2016-10-19
Supplement: supp [file elife-17929-supp-v2.zip › elife_poa_e17929_Supplementary_File_2.xlsx]

## Sheet: Sheet3
Supplementary File 2: Values of p53 mRNA expression with different mutations obtained from four different tumor types.
Sample ID	Cancer Study	Mutation	Value
TCGA-2J-AABA-01	Pancreatic Adenocarcinoma (TCGA, Provisional)	Not Mutated	1827.46
TCGA-2J-AABE-01	Pancreatic Adenocarcinoma (TCGA, Provisional)	Not Mutated	1047.02
TCGA-3A-A9I5-01	Pancreatic Adenocarcinoma (TCGA, Provisional)	Not Mutated	1827.13
TCGA-3A-A9I7-01	Pancreatic Adenocarcinoma (TCGA, Provisional)	Not Mutated	1155.11
TCGA-3A-A9IX-01	Pancreatic Adenocarcinoma (TCGA, Provisional)	Not Mutated	963.349
TCGA-3E-AAAY-01	Pancreatic Adenocarcinoma (TCGA, Provisional)	Not Mutated	657.24
TCGA-3E-AAAZ-01	Pancreatic Adenocarcinoma (TCGA, Provisional)	Not Mutated	600.224
TCGA-F2-A44G-01	Pancreatic Adenocarcinoma (TCGA, Provisional)	Not Mutated	613.135
TCGA-F2-A44H-01	Pancreatic Adenocarcinoma (TCGA, Provisional)	Not Mutated	1495.53
TCGA-FB-A4P5-01	Pancreatic Adenocarcinoma (TCGA, Provisional)	Not Mutated	956.601
TCGA-FB-A4P6-01	Pancreatic Adenocarcinoma (TCGA, Provisional)	Not Mutated	767.03
TCGA-FB-A5VM-01	Pancreatic Adenocarcinoma (TCGA, Provisional)	Not Mutated	1586.33
TCGA-FB-AAPU-01	Pancreatic Adenocarcinoma (TCGA, Provisional)	Not Mutated	2036.49
TCGA-FB-AAQ1-01	Pancreatic Adenocarcinoma (TCGA, Provisional)	Not Mutated	643.018
TCGA-FB-AAQ3-01	Pancreatic Adenocarcinoma (TCGA, Provisional)	Not Mutated	352.933
TCGA-HV-A5A4-01	Pancreatic Adenocarcinoma (TCGA, Provisional)	Not Mutated	1858.68
TCGA-HZ-7919-01	Pancreatic Adenocarcinoma (TCGA, Provisional)	Not Mutated	373.128
TCGA-HZ-7926-01	Pancreatic Adenocarcinoma (TCGA, Provisional)	Not Mutated	585.886
TCGA-HZ-8002-01	Pancreatic Adenocarcinoma (TCGA, Provisional)	Not Mutated	908.378
TCGA-HZ-8317-01	Pancreatic Adenocarcinoma (TCGA, Provisional)	Not Mutated	868.102
TCGA-HZ-8519-01	Pancreatic Adenocarcinoma (TCGA, Provisional)	Not Mutated	869.734
TCGA-HZ-A49H-01	Pancreatic Adenocarcinoma (TCGA, Provisional)	Not Mutated	1016.9
TCGA-HZ-A8P0-01	Pancreatic Adenocarcinoma (TCGA, Provisional)	Not Mutated	1112.39
TCGA-HZ-A8P1-01	Pancreatic Adenocarcinoma (TCGA, Provisional)	Not Mutated	2216.77
TCGA-IB-7651-01	Pancreatic Adenocarcinoma (TCGA, Provisional)	Not Mutated	531.36
TCGA-IB-7885-01	Pancreatic Adenocarcinoma (TCGA, Provisional)	Not Mutated	1197.62
TCGA-IB-7891-01	Pancreatic Adenocarcinoma (TCGA, Provisional)	Not Mutated	1204.25
TCGA-IB-7897-01	Pancreatic Adenocarcinoma (TCGA, Provisional)	Not Mutated	693.169
TCGA-IB-8126-01	Pancreatic Adenocarcinoma (TCGA, Provisional)	Not Mutated	694.392
TCGA-IB-A5SQ-01	Pancreatic Adenocarcinoma (TCGA, Provisional)	Not Mutated	1541.52
TCGA-IB-A7LX-01	Pancreatic Adenocarcinoma (TCGA, Provisional)	Not Mutated	2053.58
TCGA-IB-AAUM-01	Pancreatic Adenocarcinoma (TCGA, Provisional)	Not Mutated	1126.16
TCGA-IB-AAUO-01	Pancreatic Adenocarcinoma (TCGA, Provisional)	Not Mutated	1376.76
TCGA-IB-AAUR-01	Pancreatic Adenocarcinoma (TCGA, Provisional)	Not Mutated	1619.48
TCGA-IB-AAUT-01	Pancreatic Adenocarcinoma (TCGA, Provisional)	Not Mutated	1224.28
TCGA-LB-A8F3-01	Pancreatic Adenocarcinoma (TCGA, Provisional)	Not Mutated	2530.96
TCGA-Q3-A5QY-01	Pancreatic Adenocarcinoma (TCGA, Provisional)	Not Mutated	1493.4
TCGA-Q3-AA2A-01	Pancreatic Adenocarcinoma (TCGA, Provisional)	Not Mutated	1159.34
TCGA-RB-A7B8-01	Pancreatic Adenocarcinoma (TCGA, Provisional)	Not Mutated	1554.96
TCGA-S4-A8RM-01	Pancreatic Adenocarcinoma (TCGA, Provisional)	Not Mutated	745.946
TCGA-S4-A8RP-01	Pancreatic Adenocarcinoma (TCGA, Provisional)	Not Mutated	1262.04
TCGA-US-A776-01	Pancreatic Adenocarcinoma (TCGA, Provisional)	Not Mutated	2234.69
TCGA-US-A77E-01	Pancreatic Adenocarcinoma (TCGA, Provisional)	Not Mutated	477.729
TCGA-US-A77G-01	Pancreatic Adenocarcinoma (TCGA, Provisional)	Not Mutated	181.196
TCGA-YB-A89D-01	Pancreatic Adenocarcinoma (TCGA, Provisional)	Not Mutated	630.524
TCGA-YY-A8LH-01	Pancreatic Adenocarcinoma (TCGA, Provisional)	Not Mutated	132.29
TCGA-2J-AAB1-01	Pancreatic Adenocarcinoma (TCGA, Provisional)	R175H	1388.29
TCGA-2J-AAB4-01	Pancreatic Adenocarcinoma (TCGA, Provisional)	Y126N	1044.19
TCGA-2J-AAB6-01	Pancreatic Adenocarcinoma (TCGA, Provisional)	R273H	1241.52
TCGA-2J-AAB8-01	Pancreatic Adenocarcinoma (TCGA, Provisional)	S166*	754.877
TCGA-2J-AAB9-01	Pancreatic Adenocarcinoma (TCGA, Provisional)	Q104*	886.388
TCGA-2J-AABF-01	Pancreatic Adenocarcinoma (TCGA, Provisional)	C242*	750.244
TCGA-2J-AABH-01	Pancreatic Adenocarcinoma (TCGA, Provisional)	E62Kfs*61	562.718
TCGA-2J-AABK-01	Pancreatic Adenocarcinoma (TCGA, Provisional)	V272A	1336.2
TCGA-2J-AABO-01	Pancreatic Adenocarcinoma (TCGA, Provisional)	G266V	1176.28
TCGA-2J-AABR-01	Pancreatic Adenocarcinoma (TCGA, Provisional)	C141Y	1290.04
TCGA-2J-AABU-01	Pancreatic Adenocarcinoma (TCGA, Provisional)	H214R	873.362
TCGA-2J-AABV-01	Pancreatic Adenocarcinoma (TCGA, Provisional)	R282W	1138.58
TCGA-2L-AAQA-01	Pancreatic Adenocarcinoma (TCGA, Provisional)	R175H	1019.1
TCGA-2L-AAQE-01	Pancreatic Adenocarcinoma (TCGA, Provisional)	Q38*	956.441
TCGA-2L-AAQI-01	Pancreatic Adenocarcinoma (TCGA, Provisional)	R283P	1178.68
TCGA-2L-AAQJ-01	Pancreatic Adenocarcinoma (TCGA, Provisional)	G266E	1113.37
TCGA-2L-AAQL-01	Pancreatic Adenocarcinoma (TCGA, Provisional)	X126_splice	990.318
TCGA-3A-A9I9-01	Pancreatic Adenocarcinoma (TCGA, Provisional)	G245S	955.807
TCGA-3A-A9IB-01	Pancreatic Adenocarcinoma (TCGA, Provisional)	Y220C	901.34
TCGA-3A-A9IC-01	Pancreatic Adenocarcinoma (TCGA, Provisional)	V122Dfs*26	612.84
TCGA-3A-A9IH-01	Pancreatic Adenocarcinoma (TCGA, Provisional)	V143E	900.978
TCGA-3A-A9IU-01	Pancreatic Adenocarcinoma (TCGA, Provisional)	A70T	477.153
TCGA-3A-A9IZ-01	Pancreatic Adenocarcinoma (TCGA, Provisional)	S241Y	588.848
TCGA-3A-A9J0-01	Pancreatic Adenocarcinoma (TCGA, Provisional)	X187_splice	504.357
TCGA-F2-6879-01	Pancreatic Adenocarcinoma (TCGA, Provisional)	Y220C	1149.88
TCGA-F2-A7TX-01	Pancreatic Adenocarcinoma (TCGA, Provisional)	V197M	1318.38
TCGA-F2-A8YN-01	Pancreatic Adenocarcinoma (TCGA, Provisional)	Y220*	390.897
TCGA-FB-A545-01	Pancreatic Adenocarcinoma (TCGA, Provisional)	R273C	963.664
TCGA-FB-A78T-01	Pancreatic Adenocarcinoma (TCGA, Provisional)	R248L	1000
TCGA-FB-AAPS-01	Pancreatic Adenocarcinoma (TCGA, Provisional)	H179Y	1153.79
TCGA-FB-AAPY-01	Pancreatic Adenocarcinoma (TCGA, Provisional)	C242Afs*5	820.693
TCGA-FB-AAPZ-01	Pancreatic Adenocarcinoma (TCGA, Provisional)	R213*	680.666
TCGA-FB-AAQ0-01	Pancreatic Adenocarcinoma (TCGA, Provisional)	Y205S	963.907
TCGA-FB-AAQ2-01	Pancreatic Adenocarcinoma (TCGA, Provisional)	P278S	1502.09
TCGA-H6-8124-01	Pancreatic Adenocarcinoma (TCGA, Provisional)	C238Y	895.092
TCGA-H6-A45N-01	Pancreatic Adenocarcinoma (TCGA, Provisional)	R282G	1170.69
TCGA-HV-A5A3-01	Pancreatic Adenocarcinoma (TCGA, Provisional)	R248W	946.074
TCGA-HV-A5A5-01	Pancreatic Adenocarcinoma (TCGA, Provisional)	Y205F	1166.96
TCGA-HV-A5A6-01	Pancreatic Adenocarcinoma (TCGA, Provisional)	R342Efs*3	479.657
TCGA-HV-A7OL-01	Pancreatic Adenocarcinoma (TCGA, Provisional)	N131I	1235.98
TCGA-HV-AA8V-01	Pancreatic Adenocarcinoma (TCGA, Provisional)	P151R	1272.55
TCGA-HV-AA8X-01	Pancreatic Adenocarcinoma (TCGA, Provisional)	D259V	912.47
TCGA-HZ-7922-01	Pancreatic Adenocarcinoma (TCGA, Provisional)	R196*	542.612
TCGA-HZ-7925-01	Pancreatic Adenocarcinoma (TCGA, Provisional)	C135*	883.903
TCGA-HZ-8001-01	Pancreatic Adenocarcinoma (TCGA, Provisional)	R248Q	1147.65
TCGA-HZ-8003-01	Pancreatic Adenocarcinoma (TCGA, Provisional)	C124R	1013.11
TCGA-HZ-8005-01	Pancreatic Adenocarcinoma (TCGA, Provisional)	X331_splice	516.171
TCGA-HZ-8315-01	Pancreatic Adenocarcinoma (TCGA, Provisional)	H179R	1000
TCGA-HZ-8636-01	Pancreatic Adenocarcinoma (TCGA, Provisional)	V173dup	1158.09
TCGA-HZ-8637-01	Pancreatic Adenocarcinoma (TCGA, Provisional)	G245S	1297.79
TCGA-HZ-A49G-01	Pancreatic Adenocarcinoma (TCGA, Provisional)	C275F	1117.61
TCGA-HZ-A49I-01	Pancreatic Adenocarcinoma (TCGA, Provisional)	M246R	1222.39
TCGA-HZ-A4BH-01	Pancreatic Adenocarcinoma (TCGA, Provisional)	C135Y	1163.43
TCGA-HZ-A4BK-01	Pancreatic Adenocarcinoma (TCGA, Provisional)	P151T	1169.24
TCGA-HZ-A77O-01	Pancreatic Adenocarcinoma (TCGA, Provisional)	S127F	1559.95
TCGA-HZ-A77P-01	Pancreatic Adenocarcinoma (TCGA, Provisional)	S149Ffs*32	759.969
TCGA-HZ-A77Q-01	Pancreatic Adenocarcinoma (TCGA, Provisional)	R248W	963.572
TCGA-HZ-A9TJ-01	Pancreatic Adenocarcinoma (TCGA, Provisional)	R175H	1163.84
TCGA-IB-7644-01	Pancreatic Adenocarcinoma (TCGA, Provisional)	R110L	1018.1
TCGA-IB-7645-01	Pancreatic Adenocarcinoma (TCGA, Provisional)	R196*	819.127
TCGA-IB-7646-01	Pancreatic Adenocarcinoma (TCGA, Provisional)	I255T	1529.44
TCGA-IB-7647-01	Pancreatic Adenocarcinoma (TCGA, Provisional)	R248W	1171.72
TCGA-IB-7649-01	Pancreatic Adenocarcinoma (TCGA, Provisional)	X125_splice	839.346
TCGA-IB-7652-01	Pancreatic Adenocarcinoma (TCGA, Provisional)	R175H	1307.98
TCGA-IB-7886-01	Pancreatic Adenocarcinoma (TCGA, Provisional)	D57Kfs*67	533.048
TCGA-IB-7887-01	Pancreatic Adenocarcinoma (TCGA, Provisional)	S215G	1143.56
TCGA-IB-7888-01	Pancreatic Adenocarcinoma (TCGA, Provisional)	Q192*	794.717
TCGA-IB-7889-01	Pancreatic Adenocarcinoma (TCGA, Provisional)	E298*	1020.19
TCGA-IB-7890-01	Pancreatic Adenocarcinoma (TCGA, Provisional)	G199*	546.263
TCGA-IB-7893-01	Pancreatic Adenocarcinoma (TCGA, Provisional)	I254S	889.43
TCGA-IB-8127-01	Pancreatic Adenocarcinoma (TCGA, Provisional)	R273C	847.245
TCGA-IB-A5SO-01	Pancreatic Adenocarcinoma (TCGA, Provisional)	R196*	757.846
TCGA-IB-A5SP-01	Pancreatic Adenocarcinoma (TCGA, Provisional)	S241F	1010.73
TCGA-IB-A5SS-01	Pancreatic Adenocarcinoma (TCGA, Provisional)	R282W	1271.85
TCGA-IB-A5ST-01	Pancreatic Adenocarcinoma (TCGA, Provisional)	R248W	1216.69
TCGA-IB-A6UF-01	Pancreatic Adenocarcinoma (TCGA, Provisional)	R273H	681.318
TCGA-IB-A6UG-01	Pancreatic Adenocarcinoma (TCGA, Provisional)	R248W	1426.25
TCGA-IB-A7M4-01	Pancreatic Adenocarcinoma (TCGA, Provisional)	P250L	2134.92
TCGA-IB-AAUN-01	Pancreatic Adenocarcinoma (TCGA, Provisional)	R337C	1112.98
TCGA-IB-AAUP-01	Pancreatic Adenocarcinoma (TCGA, Provisional)	C124Wfs*25	1273.34
TCGA-IB-AAUQ-01	Pancreatic Adenocarcinoma (TCGA, Provisional)	H179Y	857.781
TCGA-IB-AAUS-01	Pancreatic Adenocarcinoma (TCGA, Provisional)	Q52Nfs*71	987.751
TCGA-IB-AAUU-01	Pancreatic Adenocarcinoma (TCGA, Provisional)	T123Dfs*26	349.382
TCGA-LB-A7SX-01	Pancreatic Adenocarcinoma (TCGA, Provisional)	R213*	237.968
TCGA-LB-A9Q5-01	Pancreatic Adenocarcinoma (TCGA, Provisional)	R213*	767.298
TCGA-M8-A5N4-01	Pancreatic Adenocarcinoma (TCGA, Provisional)	V274F	1022.4
TCGA-OE-A75W-01	Pancreatic Adenocarcinoma (TCGA, Provisional)	R306*	491.559
TCGA-PZ-A5RE-01	Pancreatic Adenocarcinoma (TCGA, Provisional)	L194H	997.761
TCGA-RB-AA9M-01	Pancreatic Adenocarcinoma (TCGA, Provisional)	E286*	985.408
TCGA-S4-A8RO-01	Pancreatic Adenocarcinoma (TCGA, Provisional)	R282W	1192.63
TCGA-US-A774-01	Pancreatic Adenocarcinoma (TCGA, Provisional)	C176G	1055.16
TCGA-US-A779-01	Pancreatic Adenocarcinoma (TCGA, Provisional)	D186Vfs*61	415.128
TCGA-XD-AAUG-01	Pancreatic Adenocarcinoma (TCGA, Provisional)	G154V	842.568
TCGA-XD-AAUH-01	Pancreatic Adenocarcinoma (TCGA, Provisional)	G245S	1037.48
TCGA-XD-AAUI-01	Pancreatic Adenocarcinoma (TCGA, Provisional)	R248Q	1172.36
TCGA-XD-AAUL-01	Pancreatic Adenocarcinoma (TCGA, Provisional)	H179R	808.732
TCGA-XN-A8T3-01	Pancreatic Adenocarcinoma (TCGA, Provisional)	R273C	1146.62
TCGA-XN-A8T5-01	Pancreatic Adenocarcinoma (TCGA, Provisional)	V157F	1062.57
TCGA-YH-A8SY-01	Pancreatic Adenocarcinoma (TCGA, Provisional)	R175H	1113.9
TCGA-Z5-AAPL-01	Pancreatic Adenocarcinoma (TCGA, Provisional)	N239D	1401.14
TCGA-2J-AABI-01	Pancreatic Adenocarcinoma (TCGA, Provisional)	Not Sequenced	493.106
TCGA-2J-AABP-01	Pancreatic Adenocarcinoma (TCGA, Provisional)	Not Sequenced	3607.05
TCGA-2J-AABT-01	Pancreatic Adenocarcinoma (TCGA, Provisional)	Not Sequenced	588.861
TCGA-2L-AAQM-01	Pancreatic Adenocarcinoma (TCGA, Provisional)	Not Sequenced	606.528
TCGA-3A-A9IJ-01	Pancreatic Adenocarcinoma (TCGA, Provisional)	Not Sequenced	328.767
TCGA-3A-A9IL-01	Pancreatic Adenocarcinoma (TCGA, Provisional)	Not Sequenced	1056.84
TCGA-3A-A9IN-01	Pancreatic Adenocarcinoma (TCGA, Provisional)	Not Sequenced	514.434
TCGA-3A-A9IO-01	Pancreatic Adenocarcinoma (TCGA, Provisional)	Not Sequenced	434.502
TCGA-3A-A9IR-01	Pancreatic Adenocarcinoma (TCGA, Provisional)	Not Sequenced	395.908
TCGA-3A-A9IS-01	Pancreatic Adenocarcinoma (TCGA, Provisional)	Not Sequenced	339.846
TCGA-3A-A9IV-01	Pancreatic Adenocarcinoma (TCGA, Provisional)	Not Sequenced	874.982
TCGA-F2-6880-01	Pancreatic Adenocarcinoma (TCGA, Provisional)	Not Sequenced	924.21
TCGA-F2-7273-01	Pancreatic Adenocarcinoma (TCGA, Provisional)	Not Sequenced	1025.15
TCGA-F2-7276-01	Pancreatic Adenocarcinoma (TCGA, Provisional)	Not Sequenced	1145.34
TCGA-FB-A7DR-01	Pancreatic Adenocarcinoma (TCGA, Provisional)	Not Sequenced	1302.47
TCGA-FB-AAPP-01	Pancreatic Adenocarcinoma (TCGA, Provisional)	Not Sequenced	1720.74
TCGA-FB-AAPQ-01	Pancreatic Adenocarcinoma (TCGA, Provisional)	Not Sequenced	326.668
TCGA-FB-AAQ6-01	Pancreatic Adenocarcinoma (TCGA, Provisional)	Not Sequenced	1124.88
TCGA-H8-A6C1-01	Pancreatic Adenocarcinoma (TCGA, Provisional)	Not Sequenced	1037.18
TCGA-HV-A7OP-01	Pancreatic Adenocarcinoma (TCGA, Provisional)	Not Sequenced	2833.5
TCGA-HZ-7289-01	Pancreatic Adenocarcinoma (TCGA, Provisional)	Not Sequenced	1665.97
TCGA-HZ-7918-01	Pancreatic Adenocarcinoma (TCGA, Provisional)	Not Sequenced	1373.42
TCGA-HZ-7920-01	Pancreatic Adenocarcinoma (TCGA, Provisional)	Not Sequenced	885.372
TCGA-HZ-7923-01	Pancreatic Adenocarcinoma (TCGA, Provisional)	Not Sequenced	938.37
TCGA-HZ-7924-01	Pancreatic Adenocarcinoma (TCGA, Provisional)	Not Sequenced	1143.89
TCGA-HZ-8638-01	Pancreatic Adenocarcinoma (TCGA, Provisional)	Not Sequenced	920.449
TCGA-HZ-A9TJ-06	Pancreatic Adenocarcinoma (TCGA, Provisional)	Not Sequenced	1170.21
TCGA-IB-7654-01	Pancreatic Adenocarcinoma (TCGA, Provisional)	Not Sequenced	1505.74
TCGA-IB-AAUV-01	Pancreatic Adenocarcinoma (TCGA, Provisional)	Not Sequenced	857.557
TCGA-IB-AAUW-01	Pancreatic Adenocarcinoma (TCGA, Provisional)	Not Sequenced	1069.21
TCGA-L1-A7W4-01	Pancreatic Adenocarcinoma (TCGA, Provisional)	Not Sequenced	509.666
TCGA-RL-AAAS-01	Pancreatic Adenocarcinoma (TCGA, Provisional)	Not Sequenced	1554.13
TCGA-US-A77J-01	Pancreatic Adenocarcinoma (TCGA, Provisional)	Not Sequenced	1407.43
TCGA-3B-A9HI-01	Sarcoma (TCGA, Provisional)	Not Mutated	798.419
TCGA-3B-A9HJ-01	Sarcoma (TCGA, Provisional)	Not Mutated	2002.34
TCGA-3B-A9HL-01	Sarcoma (TCGA, Provisional)	Not Mutated	1263.32
TCGA-3B-A9HO-01	Sarcoma (TCGA, Provisional)	Not Mutated	1606.18
TCGA-3B-A9HR-01	Sarcoma (TCGA, Provisional)	Not Mutated	65.74
TCGA-3B-A9HS-01	Sarcoma (TCGA, Provisional)	Not Mutated	1676.28
TCGA-3R-A8YX-01	Sarcoma (TCGA, Provisional)	Not Mutated	834.935
TCGA-DX-A1KU-01	Sarcoma (TCGA, Provisional)	Not Mutated	1621.48
TCGA-DX-A1KW-01	Sarcoma (TCGA, Provisional)	Not Mutated	1963
TCGA-DX-A1KY-01	Sarcoma (TCGA, Provisional)	Not Mutated	2507.46
TCGA-DX-A1KZ-01	Sarcoma (TCGA, Provisional)	Not Mutated	1221.23
TCGA-DX-A1L0-01	Sarcoma (TCGA, Provisional)	Not Mutated	1380.41
TCGA-DX-A1L2-01	Sarcoma (TCGA, Provisional)	Not Mutated	1532.86
TCGA-DX-A1L3-01	Sarcoma (TCGA, Provisional)	Not Mutated	1151.08
TCGA-DX-A1L4-01	Sarcoma (TCGA, Provisional)	Not Mutated	1313.3
TCGA-DX-A23R-01	Sarcoma (TCGA, Provisional)	Not Mutated	1095.6
TCGA-DX-A23T-01	Sarcoma (TCGA, Provisional)	Not Mutated	1393.68
TCGA-DX-A23U-01	Sarcoma (TCGA, Provisional)	Not Mutated	1237.7
TCGA-DX-A23V-01	Sarcoma (TCGA, Provisional)	Not Mutated	1685.79
TCGA-DX-A23Y-01	Sarcoma (TCGA, Provisional)	Not Mutated	2080.74
TCGA-DX-A240-01	Sarcoma (TCGA, Provisional)	Not Mutated	1391.46
TCGA-DX-A2IZ-01	Sarcoma (TCGA, Provisional)	Not Mutated	4637.47
TCGA-DX-A2J0-01	Sarcoma (TCGA, Provisional)	Not Mutated	1021.07
TCGA-DX-A2J4-01	Sarcoma (TCGA, Provisional)	Not Mutated	1472.4
TCGA-DX-A3LS-01	Sarcoma (TCGA, Provisional)	Not Mutated	1818.57
TCGA-DX-A3LT-01	Sarcoma (TCGA, Provisional)	Not Mutated	1673.31
TCGA-DX-A3LU-01	Sarcoma (TCGA, Provisional)	Not Mutated	1784.13
TCGA-DX-A3LW-01	Sarcoma (TCGA, Provisional)	Not Mutated	1649.75
TCGA-DX-A3LY-01	Sarcoma (TCGA, Provisional)	Not Mutated	2084.31
TCGA-DX-A3M1-01	Sarcoma (TCGA, Provisional)	Not Mutated	1116.04
TCGA-DX-A3U5-01	Sarcoma (TCGA, Provisional)	Not Mutated	1811.68
TCGA-DX-A3U6-01	Sarcoma (TCGA, Provisional)	Not Mutated	1603.96
TCGA-DX-A3U7-01	Sarcoma (TCGA, Provisional)	Not Mutated	96.0147
TCGA-DX-A3U8-01	Sarcoma (TCGA, Provisional)	Not Mutated	1157.49
TCGA-DX-A3U9-01	Sarcoma (TCGA, Provisional)	Not Mutated	203.992
TCGA-DX-A3UA-01	Sarcoma (TCGA, Provisional)	Not Mutated	1270.51
TCGA-DX-A3UB-01	Sarcoma (TCGA, Provisional)	Not Mutated	1642.32
TCGA-DX-A3UC-01	Sarcoma (TCGA, Provisional)	Not Mutated	1767.46
TCGA-DX-A3UD-01	Sarcoma (TCGA, Provisional)	Not Mutated	743.017
TCGA-DX-A48K-01	Sarcoma (TCGA, Provisional)	Not Mutated	377.974
TCGA-DX-A48L-01	Sarcoma (TCGA, Provisional)	Not Mutated	134.238
TCGA-DX-A48N-01	Sarcoma (TCGA, Provisional)	Not Mutated	1484.02
TCGA-DX-A48P-01	Sarcoma (TCGA, Provisional)	Not Mutated	156.919
TCGA-DX-A48R-01	Sarcoma (TCGA, Provisional)	Not Mutated	128.466
TCGA-DX-A6B9-01	Sarcoma (TCGA, Provisional)	Not Mutated	769.053
TCGA-DX-A6BE-01	Sarcoma (TCGA, Provisional)	Not Mutated	1350.17
TCGA-DX-A6BF-01	Sarcoma (TCGA, Provisional)	Not Mutated	1307.69
TCGA-DX-A6BG-01	Sarcoma (TCGA, Provisional)	Not Mutated	1658.98
TCGA-DX-A6BH-01	Sarcoma (TCGA, Provisional)	Not Mutated	1029.99
TCGA-DX-A6YQ-01	Sarcoma (TCGA, Provisional)	Not Mutated	591.44
TCGA-DX-A6YR-01	Sarcoma (TCGA, Provisional)	Not Mutated	1761.36
TCGA-DX-A6YX-01	Sarcoma (TCGA, Provisional)	Not Mutated	189.535
TCGA-DX-A6YZ-01	Sarcoma (TCGA, Provisional)	Not Mutated	703.818
TCGA-DX-A7EF-01	Sarcoma (TCGA, Provisional)	Not Mutated	279.093
TCGA-DX-A7EI-01	Sarcoma (TCGA, Provisional)	Not Mutated	1156.14
TCGA-DX-A7EL-01	Sarcoma (TCGA, Provisional)	Not Mutated	489.279
TCGA-DX-A7EM-01	Sarcoma (TCGA, Provisional)	Not Mutated	956.13
TCGA-DX-A7EO-01	Sarcoma (TCGA, Provisional)	Not Mutated	2071.1
TCGA-DX-A7EQ-01	Sarcoma (TCGA, Provisional)	Not Mutated	497.297
TCGA-DX-A7ER-01	Sarcoma (TCGA, Provisional)	Not Mutated	3811.63
TCGA-DX-A7ES-01	Sarcoma (TCGA, Provisional)	Not Mutated	1529.83
TCGA-DX-A8BG-01	Sarcoma (TCGA, Provisional)	Not Mutated	642.893
TCGA-DX-A8BJ-01	Sarcoma (TCGA, Provisional)	Not Mutated	143.411
TCGA-DX-A8BM-01	Sarcoma (TCGA, Provisional)	Not Mutated	149.578
TCGA-DX-A8BN-01	Sarcoma (TCGA, Provisional)	Not Mutated	237.869
TCGA-DX-A8BO-01	Sarcoma (TCGA, Provisional)	Not Mutated	281.587
TCGA-DX-A8BQ-01	Sarcoma (TCGA, Provisional)	Not Mutated	1070.9
TCGA-DX-A8BR-01	Sarcoma (TCGA, Provisional)	Not Mutated	533.079
TCGA-DX-A8BS-01	Sarcoma (TCGA, Provisional)	Not Mutated	240.834
TCGA-DX-A8BT-01	Sarcoma (TCGA, Provisional)	Not Mutated	354.12
TCGA-DX-A8BX-01	Sarcoma (TCGA, Provisional)	Not Mutated	1598.94
TCGA-DX-A8BZ-01	Sarcoma (TCGA, Provisional)	Not Mutated	475.447
TCGA-DX-AB2F-01	Sarcoma (TCGA, Provisional)	Not Mutated	786.605
TCGA-DX-AB2G-01	Sarcoma (TCGA, Provisional)	Not Mutated	1565.65
TCGA-DX-AB2H-01	Sarcoma (TCGA, Provisional)	Not Mutated	2519.95
TCGA-DX-AB2J-01	Sarcoma (TCGA, Provisional)	Not Mutated	2499.25
TCGA-DX-AB2O-01	Sarcoma (TCGA, Provisional)	Not Mutated	610.806
TCGA-DX-AB2P-01	Sarcoma (TCGA, Provisional)	Not Mutated	248.617
TCGA-DX-AB2Q-01	Sarcoma (TCGA, Provisional)	Not Mutated	257.198
TCGA-DX-AB2S-01	Sarcoma (TCGA, Provisional)	Not Mutated	1994.91
TCGA-DX-AB2T-01	Sarcoma (TCGA, Provisional)	Not Mutated	593.9
TCGA-DX-AB2W-01	Sarcoma (TCGA, Provisional)	Not Mutated	1191.98
TCGA-DX-AB2Z-01	Sarcoma (TCGA, Provisional)	Not Mutated	388.871
TCGA-DX-AB35-01	Sarcoma (TCGA, Provisional)	Not Mutated	1980.21
TCGA-DX-AB36-01	Sarcoma (TCGA, Provisional)	Not Mutated	2501.24
TCGA-DX-AB37-01	Sarcoma (TCGA, Provisional)	Not Mutated	1662.77
TCGA-DX-AB3A-01	Sarcoma (TCGA, Provisional)	Not Mutated	2109.19
TCGA-DX-AB3B-01	Sarcoma (TCGA, Provisional)	Not Mutated	2168.36
TCGA-DX-AB3C-01	Sarcoma (TCGA, Provisional)	Not Mutated	3725.69
TCGA-FX-A2QS-01	Sarcoma (TCGA, Provisional)	Not Mutated	2316.48
TCGA-FX-A3NJ-01	Sarcoma (TCGA, Provisional)	Not Mutated	99.9075
TCGA-FX-A3NK-01	Sarcoma (TCGA, Provisional)	Not Mutated	1416.83
TCGA-FX-A3RE-01	Sarcoma (TCGA, Provisional)	Not Mutated	1244.43
TCGA-FX-A48G-01	Sarcoma (TCGA, Provisional)	Not Mutated	2985.35
TCGA-FX-A76Y-01	Sarcoma (TCGA, Provisional)	Not Mutated	101.943
TCGA-FX-A8OO-01	Sarcoma (TCGA, Provisional)	Not Mutated	3571.32
TCGA-HB-A2OT-01	Sarcoma (TCGA, Provisional)	Not Mutated	467.285
TCGA-HB-A3L4-01	Sarcoma (TCGA, Provisional)	Not Mutated	74.5577
TCGA-HB-A3YV-01	Sarcoma (TCGA, Provisional)	Not Mutated	1606.98
TCGA-HB-A43Z-01	Sarcoma (TCGA, Provisional)	Not Mutated	667.337
TCGA-HS-A5N8-01	Sarcoma (TCGA, Provisional)	Not Mutated	170.047
TCGA-IE-A3OV-01	Sarcoma (TCGA, Provisional)	Not Mutated	192.279
TCGA-IE-A4EK-01	Sarcoma (TCGA, Provisional)	Not Mutated	30.3672
TCGA-IE-A6BZ-01	Sarcoma (TCGA, Provisional)	Not Mutated	86.6897
TCGA-IF-A4AJ-01	Sarcoma (TCGA, Provisional)	Not Mutated	1895.69
TCGA-IF-A4AK-01	Sarcoma (TCGA, Provisional)	Not Mutated	296.046
TCGA-IS-A3K8-01	Sarcoma (TCGA, Provisional)	Not Mutated	3406.92
TCGA-IW-A3M4-01	Sarcoma (TCGA, Provisional)	Not Mutated	2849.28
TCGA-IW-A3M6-01	Sarcoma (TCGA, Provisional)	Not Mutated	1292.83
TCGA-JV-A5VE-01	Sarcoma (TCGA, Provisional)	Not Mutated	117.499
TCGA-JV-A75J-01	Sarcoma (TCGA, Provisional)	Not Mutated	26.3997
TCGA-K1-A3PO-01	Sarcoma (TCGA, Provisional)	Not Mutated	1372.32
TCGA-K1-A42X-01	Sarcoma (TCGA, Provisional)	Not Mutated	2254.61
TCGA-K1-A6RU-01	Sarcoma (TCGA, Provisional)	Not Mutated	483.304
TCGA-KD-A5QS-01	Sarcoma (TCGA, Provisional)	Not Mutated	131.422
TCGA-KD-A5QU-01	Sarcoma (TCGA, Provisional)	Not Mutated	149.737
TCGA-MB-A5Y8-01	Sarcoma (TCGA, Provisional)	Not Mutated	205.491
TCGA-MB-A5YA-01	Sarcoma (TCGA, Provisional)	Not Mutated	172.488
TCGA-MB-A8JK-01	Sarcoma (TCGA, Provisional)	Not Mutated	583.697
TCGA-MJ-A68H-01	Sarcoma (TCGA, Provisional)	Not Mutated	1461.5
TCGA-MJ-A68J-01	Sarcoma (TCGA, Provisional)	Not Mutated	1412.68
TCGA-MJ-A850-01	Sarcoma (TCGA, Provisional)	Not Mutated	4260.23
TCGA-MO-A47R-01	Sarcoma (TCGA, Provisional)	Not Mutated	1357.61
TCGA-PC-A5DL-01	Sarcoma (TCGA, Provisional)	Not Mutated	634.361
TCGA-PC-A5DN-01	Sarcoma (TCGA, Provisional)	Not Mutated	1813.67
TCGA-PC-A5DO-01	Sarcoma (TCGA, Provisional)	Not Mutated	527.027
TCGA-PT-A8TR-01	Sarcoma (TCGA, Provisional)	Not Mutated	2104.33
TCGA-QC-AA9N-01	Sarcoma (TCGA, Provisional)	Not Mutated	127.407
TCGA-QQ-A5V2-01	Sarcoma (TCGA, Provisional)	Not Mutated	514.144
TCGA-QQ-A5VC-01	Sarcoma (TCGA, Provisional)	Not Mutated	33.1224
TCGA-QQ-A8VD-01	Sarcoma (TCGA, Provisional)	Not Mutated	1224.58
TCGA-QQ-A8VG-01	Sarcoma (TCGA, Provisional)	Not Mutated	1686.02
TCGA-RN-A68Q-01	Sarcoma (TCGA, Provisional)	Not Mutated	1422.54
TCGA-RN-AAAQ-01	Sarcoma (TCGA, Provisional)	Not Mutated	1078.44
TCGA-SG-A6Z7-01	Sarcoma (TCGA, Provisional)	Not Mutated	819.894
TCGA-SG-A849-01	Sarcoma (TCGA, Provisional)	Not Mutated	584.169
TCGA-SI-A71O-01	Sarcoma (TCGA, Provisional)	Not Mutated	115.077
TCGA-SI-A71P-01	Sarcoma (TCGA, Provisional)	Not Mutated	1194.46
TCGA-SI-A71Q-01	Sarcoma (TCGA, Provisional)	Not Mutated	892.787
TCGA-SI-AA8B-01	Sarcoma (TCGA, Provisional)	Not Mutated	121.394
TCGA-SI-AA8C-01	Sarcoma (TCGA, Provisional)	Not Mutated	1204.56
TCGA-UE-A6QU-01	Sarcoma (TCGA, Provisional)	Not Mutated	438.18
TCGA-VT-A80G-01	Sarcoma (TCGA, Provisional)	Not Mutated	85.5769
TCGA-VT-AB3D-01	Sarcoma (TCGA, Provisional)	Not Mutated	1565.93
TCGA-WK-A8XO-01	Sarcoma (TCGA, Provisional)	Not Mutated	957.688
TCGA-WK-A8XQ-01	Sarcoma (TCGA, Provisional)	Not Mutated	2055.78
TCGA-WK-A8XS-01	Sarcoma (TCGA, Provisional)	Not Mutated	84.7458
TCGA-WK-A8XT-01	Sarcoma (TCGA, Provisional)	Not Mutated	4148.38
TCGA-X6-A7W8-01	Sarcoma (TCGA, Provisional)	Not Mutated	315.737
TCGA-X6-A7WD-01	Sarcoma (TCGA, Provisional)	Not Mutated	160.471
TCGA-X6-A8C3-01	Sarcoma (TCGA, Provisional)	Not Mutated	284.04
TCGA-X6-A8C4-01	Sarcoma (TCGA, Provisional)	Not Mutated	72.4055
TCGA-X6-A8C6-01	Sarcoma (TCGA, Provisional)	Not Mutated	421.678
TCGA-X6-A8C7-01	Sarcoma (TCGA, Provisional)	Not Mutated	2929.07
TCGA-X9-A971-01	Sarcoma (TCGA, Provisional)	Not Mutated	130.88
TCGA-X9-A973-01	Sarcoma (TCGA, Provisional)	Not Mutated	1514.41
TCGA-Z4-A8JB-01	Sarcoma (TCGA, Provisional)	Not Mutated	1311.1
TCGA-Z4-A9VC-01	Sarcoma (TCGA, Provisional)	Not Mutated	3131.89
TCGA-Z4-AAPF-01	Sarcoma (TCGA, Provisional)	Not Mutated	2013.88
TCGA-3B-A9HP-01	Sarcoma (TCGA, Provisional)	X126_splice	1185.88
TCGA-3B-A9HQ-01	Sarcoma (TCGA, Provisional)	X187_splice	285.569
TCGA-3B-A9HT-01	Sarcoma (TCGA, Provisional)	W91*	444.444
TCGA-3B-A9HU-01	Sarcoma (TCGA, Provisional)	X261_splice	871.924
TCGA-3B-A9HV-01	Sarcoma (TCGA, Provisional)	L194R, E224D	1558.57
TCGA-3B-A9HX-01	Sarcoma (TCGA, Provisional)	R156G	747.212
TCGA-3B-A9HY-01	Sarcoma (TCGA, Provisional)	R248W	1562.09
TCGA-3B-A9HZ-01	Sarcoma (TCGA, Provisional)	C275Y	755.319
TCGA-3B-A9I0-01	Sarcoma (TCGA, Provisional)	Q192del	779.865
TCGA-3B-A9I1-01	Sarcoma (TCGA, Provisional)	G244S	1151.17
TCGA-3B-A9I3-01	Sarcoma (TCGA, Provisional)	R175H	1286.79
TCGA-DX-A1KX-01	Sarcoma (TCGA, Provisional)	L130Hfs*16	398.37
TCGA-DX-A1L1-01	Sarcoma (TCGA, Provisional)	K139E	2146.52
TCGA-DX-A2J1-01	Sarcoma (TCGA, Provisional)	R213*	1099.52
TCGA-DX-A3M2-01	Sarcoma (TCGA, Provisional)	M237I	3081.1
TCGA-DX-A3UE-01	Sarcoma (TCGA, Provisional)	G262del	1323.18
TCGA-DX-A3UF-01	Sarcoma (TCGA, Provisional)	Y220D	1554.57
TCGA-DX-A48J-01	Sarcoma (TCGA, Provisional)	R175H	544.05
TCGA-DX-A48O-01	Sarcoma (TCGA, Provisional)	R158H	634.39
TCGA-DX-A48U-01	Sarcoma (TCGA, Provisional)	R175L	491.886
TCGA-DX-A6B7-01	Sarcoma (TCGA, Provisional)	C275Y	555.882
TCGA-DX-A6B8-01	Sarcoma (TCGA, Provisional)	V73Rfs*76	236.895
TCGA-DX-A6BA-01	Sarcoma (TCGA, Provisional)	X187_splice	187.28
TCGA-DX-A6BB-01	Sarcoma (TCGA, Provisional)	R175H	1496.74
TCGA-DX-A6YU-01	Sarcoma (TCGA, Provisional)	Y126C	2054.62
TCGA-DX-A6Z0-01	Sarcoma (TCGA, Provisional)	N288Kfs*59	608.544
TCGA-DX-A6Z2-01	Sarcoma (TCGA, Provisional)	K351E	714.317
TCGA-DX-A7EN-01	Sarcoma (TCGA, Provisional)	R273H, V203L	1569.97
TCGA-DX-A7ET-01	Sarcoma (TCGA, Provisional)	K120Tfs*2	490.419
TCGA-DX-A7EU-01	Sarcoma (TCGA, Provisional)	M237I	1463.11
TCGA-DX-A8BH-01	Sarcoma (TCGA, Provisional)	X187_splice	313.109
TCGA-DX-A8BK-01	Sarcoma (TCGA, Provisional)	X187_splice	619.416
TCGA-DX-A8BL-01	Sarcoma (TCGA, Provisional)	F270del	3235.48
TCGA-DX-A8BP-01	Sarcoma (TCGA, Provisional)	C135R	2101.72
TCGA-DX-A8BU-01	Sarcoma (TCGA, Provisional)	T256Ifs*90	486.942
TCGA-DX-A8BV-01	Sarcoma (TCGA, Provisional)	R213*	1259.01
TCGA-DX-AATS-01	Sarcoma (TCGA, Provisional)	Q167*	282.835
TCGA-DX-AB2E-01	Sarcoma (TCGA, Provisional)	R342*	260.324
TCGA-DX-AB2V-01	Sarcoma (TCGA, Provisional)	X224_splice	673.263
TCGA-DX-AB2X-01	Sarcoma (TCGA, Provisional)	R175H	1547.69
TCGA-DX-AB30-01	Sarcoma (TCGA, Provisional)	P278H	2071.92
TCGA-DX-AB32-01	Sarcoma (TCGA, Provisional)	L252del	1281.64
TCGA-FX-A3TO-01	Sarcoma (TCGA, Provisional)	H214R	804.545
TCGA-HB-A5W3-01	Sarcoma (TCGA, Provisional)	W91*	276.339
TCGA-HS-A5N7-01	Sarcoma (TCGA, Provisional)	M246V	1022.65
TCGA-IE-A4EH-01	Sarcoma (TCGA, Provisional)	Y234C	2985.67
TCGA-IE-A4EI-01	Sarcoma (TCGA, Provisional)	E336Afs*10	398.986
TCGA-IE-A4EJ-01	Sarcoma (TCGA, Provisional)	R213P	1873.83
TCGA-IS-A3K6-01	Sarcoma (TCGA, Provisional)	F270V	597.918
TCGA-IS-A3K7-01	Sarcoma (TCGA, Provisional)	Q317*	349.038
TCGA-IS-A3KA-01	Sarcoma (TCGA, Provisional)	R337L	844.01
TCGA-IW-A3M5-01	Sarcoma (TCGA, Provisional)	Y205C	2476.52
TCGA-JV-A5VF-01	Sarcoma (TCGA, Provisional)	R248W	3202.5
TCGA-K1-A3PN-02	Sarcoma (TCGA, Provisional)	C238Y	795.307
TCGA-K1-A42W-01	Sarcoma (TCGA, Provisional)	G302V, S303Lfs*41	345.614
TCGA-K1-A6RT-01	Sarcoma (TCGA, Provisional)	G266R	1297.9
TCGA-K1-A6RV-01	Sarcoma (TCGA, Provisional)	S215R	739.176
TCGA-KD-A5QT-01	Sarcoma (TCGA, Provisional)	H179N	722.501
TCGA-KF-A41W-01	Sarcoma (TCGA, Provisional)	I195F	985.263
TCGA-LI-A67I-01	Sarcoma (TCGA, Provisional)	R213Dfs*34	202.273
TCGA-LI-A9QH-01	Sarcoma (TCGA, Provisional)	X125_splice	1122.67
TCGA-MB-A5Y9-01	Sarcoma (TCGA, Provisional)	X307_splice	590.187
TCGA-MB-A8JL-01	Sarcoma (TCGA, Provisional)	D281E, V272M	1755.31
TCGA-N1-A6IA-01	Sarcoma (TCGA, Provisional)	A189Pfs*58	401.042
TCGA-PC-A5DK-01	Sarcoma (TCGA, Provisional)	Y220C	907.224
TCGA-QC-A6FX-01	Sarcoma (TCGA, Provisional)	C242S	1719.91
TCGA-QC-A7B5-01	Sarcoma (TCGA, Provisional)	E286K	3282.99
TCGA-QQ-A5V9-01	Sarcoma (TCGA, Provisional)	E298*	483.466
TCGA-QQ-A5VA-01	Sarcoma (TCGA, Provisional)	Y220H	1821.63
TCGA-QQ-A5VB-01	Sarcoma (TCGA, Provisional)	C275Lfs*70	611.879
TCGA-QQ-A5VD-01	Sarcoma (TCGA, Provisional)	R248W	1373.15
TCGA-QQ-A8VH-01	Sarcoma (TCGA, Provisional)	Y163N	3164.7
TCGA-SG-A6Z4-01	Sarcoma (TCGA, Provisional)	X332_splice	1302.7
TCGA-UE-A6QT-01	Sarcoma (TCGA, Provisional)	S241F	1488.86
TCGA-VT-A80J-02	Sarcoma (TCGA, Provisional)	H179Q	728.612
TCGA-WK-A8XX-01	Sarcoma (TCGA, Provisional)	D259V	1403.71
TCGA-WK-A8XY-01	Sarcoma (TCGA, Provisional)	X224_splice	128.346
TCGA-WK-A8XZ-01	Sarcoma (TCGA, Provisional)	K132E	810.62
TCGA-WK-A8Y0-01	Sarcoma (TCGA, Provisional)	R335Vfs*10	632.419
TCGA-WP-A9GB-01	Sarcoma (TCGA, Provisional)	R248Q	2371.29
TCGA-X2-A95T-01	Sarcoma (TCGA, Provisional)	F113del	2291.81
TCGA-X6-A7WC-01	Sarcoma (TCGA, Provisional)	G244S	2129.59
TCGA-X6-A8C2-01	Sarcoma (TCGA, Provisional)	N268Y, S269Afs*76	306.211
TCGA-X6-A8C5-01	Sarcoma (TCGA, Provisional)	C238Y	1163.13
TCGA-Z4-AAPG-01	Sarcoma (TCGA, Provisional)	X119_splice	402.091
TCGA-DX-A23Z-01	Sarcoma (TCGA, Provisional)	Not Sequenced	1419.95
TCGA-DX-A6YS-01	Sarcoma (TCGA, Provisional)	Not Sequenced	163.101
TCGA-DX-A6YT-01	Sarcoma (TCGA, Provisional)	Not Sequenced	183.506
TCGA-DX-A6YV-01	Sarcoma (TCGA, Provisional)	Not Sequenced	65.3165
TCGA-HS-A5N9-01	Sarcoma (TCGA, Provisional)	Not Sequenced	380.718
TCGA-HS-A5NA-01	Sarcoma (TCGA, Provisional)	Not Sequenced	1601.32
TCGA-IF-A3RQ-01	Sarcoma (TCGA, Provisional)	Not Sequenced	1322.68
TCGA-K1-A3PN-01	Sarcoma (TCGA, Provisional)	Not Sequenced	828.635
TCGA-K1-A42X-02	Sarcoma (TCGA, Provisional)	Not Sequenced	2266.45
TCGA-MO-A47P-01	Sarcoma (TCGA, Provisional)	Not Sequenced	502.525
TCGA-PC-A5DM-01	Sarcoma (TCGA, Provisional)	Not Sequenced	86.7188
TCGA-PC-A5DP-01	Sarcoma (TCGA, Provisional)	Not Sequenced	982.027
TCGA-QQ-A8VB-01	Sarcoma (TCGA, Provisional)	Not Sequenced	960.194
TCGA-QQ-A8VF-01	Sarcoma (TCGA, Provisional)	Not Sequenced	345.772
TCGA-SI-A71O-06	Sarcoma (TCGA, Provisional)	Not Sequenced	312.363
TCGA-VT-A80J-01	Sarcoma (TCGA, Provisional)	Not Sequenced	636.741
TCGA-X6-A7WA-01	Sarcoma (TCGA, Provisional)	Not Sequenced	1573.15
TCGA-X6-A7WB-01	Sarcoma (TCGA, Provisional)	Not Sequenced	235.887
TCGA-18-3412-01	Lung Squamous Cell Carcinoma (TCGA, Provisional)	Not Mutated	2746.09
TCGA-18-3417-01	Lung Squamous Cell Carcinoma (TCGA, Provisional)	Not Mutated	563.866
TCGA-18-4721-01	Lung Squamous Cell Carcinoma (TCGA, Provisional)	Not Mutated	2326.13
TCGA-18-5595-01	Lung Squamous Cell Carcinoma (TCGA, Provisional)	Not Mutated	5667.33
TCGA-21-1070-01	Lung Squamous Cell Carcinoma (TCGA, Provisional)	Not Mutated	1758.02
TCGA-21-1071-01	Lung Squamous Cell Carcinoma (TCGA, Provisional)	Not Mutated	2462.6
TCGA-21-1077-01	Lung Squamous Cell Carcinoma (TCGA, Provisional)	Not Mutated	346.291
TCGA-21-1078-01	Lung Squamous Cell Carcinoma (TCGA, Provisional)	Not Mutated	3668.97
TCGA-21-1081-01	Lung Squamous Cell Carcinoma (TCGA, Provisional)	Not Mutated	489.673
TCGA-22-1002-01	Lung Squamous Cell Carcinoma (TCGA, Provisional)	Not Mutated	637.404
TCGA-22-4591-01	Lung Squamous Cell Carcinoma (TCGA, Provisional)	Not Mutated	413.55
TCGA-22-5472-01	Lung Squamous Cell Carcinoma (TCGA, Provisional)	Not Mutated	2322.91
TCGA-34-5231-01	Lung Squamous Cell Carcinoma (TCGA, Provisional)	Not Mutated	345.646
TCGA-34-5234-01	Lung Squamous Cell Carcinoma (TCGA, Provisional)	Not Mutated	631.493
TCGA-34-5241-01	Lung Squamous Cell Carcinoma (TCGA, Provisional)	Not Mutated	460.7
TCGA-39-5022-01	Lung Squamous Cell Carcinoma (TCGA, Provisional)	Not Mutated	851.339
TCGA-39-5030-01	Lung Squamous Cell Carcinoma (TCGA, Provisional)	Not Mutated	866.883
TCGA-39-5039-01	Lung Squamous Cell Carcinoma (TCGA, Provisional)	Not Mutated	690.604
TCGA-43-2578-01	Lung Squamous Cell Carcinoma (TCGA, Provisional)	Not Mutated	731.264
TCGA-43-6647-01	Lung Squamous Cell Carcinoma (TCGA, Provisional)	Not Mutated	1812.22
TCGA-43-6771-01	Lung Squamous Cell Carcinoma (TCGA, Provisional)	Not Mutated	2006.25
TCGA-46-3765-01	Lung Squamous Cell Carcinoma (TCGA, Provisional)	Not Mutated	1047.12
TCGA-46-3766-01	Lung Squamous Cell Carcinoma (TCGA, Provisional)	Not Mutated	1451.45
TCGA-60-2709-01	Lung Squamous Cell Carcinoma (TCGA, Provisional)	Not Mutated	1679.5
TCGA-60-2712-01	Lung Squamous Cell Carcinoma (TCGA, Provisional)	Not Mutated	950.577
TCGA-60-2715-01	Lung Squamous Cell Carcinoma (TCGA, Provisional)	Not Mutated	1150.98
TCGA-60-2725-01	Lung Squamous Cell Carcinoma (TCGA, Provisional)	Not Mutated	577.208
TCGA-60-2726-01	Lung Squamous Cell Carcinoma (TCGA, Provisional)	Not Mutated	176.549
TCGA-66-2771-01	Lung Squamous Cell Carcinoma (TCGA, Provisional)	Not Mutated	398.019
TCGA-66-2773-01	Lung Squamous Cell Carcinoma (TCGA, Provisional)	Not Mutated	820.545
TCGA-66-2778-01	Lung Squamous Cell Carcinoma (TCGA, Provisional)	Not Mutated	275.21
TCGA-66-2780-01	Lung Squamous Cell Carcinoma (TCGA, Provisional)	Not Mutated	378.782
TCGA-66-2781-01	Lung Squamous Cell Carcinoma (TCGA, Provisional)	Not Mutated	250.176
TCGA-66-2785-01	Lung Squamous Cell Carcinoma (TCGA, Provisional)	Not Mutated	437.474
TCGA-66-2789-01	Lung Squamous Cell Carcinoma (TCGA, Provisional)	Not Mutated	1276.43
TCGA-70-6722-01	Lung Squamous Cell Carcinoma (TCGA, Provisional)	Not Mutated	533.064
TCGA-85-6175-01	Lung Squamous Cell Carcinoma (TCGA, Provisional)	Not Mutated	2272.47
TCGA-18-3406-01	Lung Squamous Cell Carcinoma (TCGA, Provisional)	V216E	1196.06
TCGA-18-3407-01	Lung Squamous Cell Carcinoma (TCGA, Provisional)	F212Sfs*3	444.815
TCGA-18-3408-01	Lung Squamous Cell Carcinoma (TCGA, Provisional)	C242F	2651.64
TCGA-18-3409-01	Lung Squamous Cell Carcinoma (TCGA, Provisional)	N210Wfs*30	661.538
TCGA-18-3410-01	Lung Squamous Cell Carcinoma (TCGA, Provisional)	R213G	5145.73
TCGA-18-3411-01	Lung Squamous Cell Carcinoma (TCGA, Provisional)	E298*	281.605
TCGA-18-3414-01	Lung Squamous Cell Carcinoma (TCGA, Provisional)	R273L	2088.98
TCGA-18-3415-01	Lung Squamous Cell Carcinoma (TCGA, Provisional)	R282Q	2264.16
TCGA-18-3416-01	Lung Squamous Cell Carcinoma (TCGA, Provisional)	G244Afs*3	416.752
TCGA-18-3419-01	Lung Squamous Cell Carcinoma (TCGA, Provisional)	D259Y, D259V	847.263
TCGA-18-3421-01	Lung Squamous Cell Carcinoma (TCGA, Provisional)	V172G	2159.3
TCGA-18-4083-01	Lung Squamous Cell Carcinoma (TCGA, Provisional)	T155P	1545.84
TCGA-18-4086-01	Lung Squamous Cell Carcinoma (TCGA, Provisional)	X225_splice	515.997
TCGA-18-5592-01	Lung Squamous Cell Carcinoma (TCGA, Provisional)	H179L	3970.05
TCGA-21-1076-01	Lung Squamous Cell Carcinoma (TCGA, Provisional)	Y163C	1835.25
TCGA-21-5782-01	Lung Squamous Cell Carcinoma (TCGA, Provisional)	I195S	2588.76
TCGA-21-5784-01	Lung Squamous Cell Carcinoma (TCGA, Provisional)	W91*	716.576
TCGA-21-5786-01	Lung Squamous Cell Carcinoma (TCGA, Provisional)	V157F	2447.4
TCGA-21-5787-01	Lung Squamous Cell Carcinoma (TCGA, Provisional)	C176Y	1866.23
TCGA-22-0944-01	Lung Squamous Cell Carcinoma (TCGA, Provisional)	Y234C	2289.76
TCGA-22-1011-01	Lung Squamous Cell Carcinoma (TCGA, Provisional)	E271K	1965.84
TCGA-22-1012-01	Lung Squamous Cell Carcinoma (TCGA, Provisional)	E224D	372.287
TCGA-22-1016-01	Lung Squamous Cell Carcinoma (TCGA, Provisional)	Y220C	1710.65
TCGA-22-4593-01	Lung Squamous Cell Carcinoma (TCGA, Provisional)	D49Sfs*69	422.637
TCGA-22-4595-01	Lung Squamous Cell Carcinoma (TCGA, Provisional)	P250L	1144.25
TCGA-22-4599-01	Lung Squamous Cell Carcinoma (TCGA, Provisional)	G245C	2010.65
TCGA-22-4601-01	Lung Squamous Cell Carcinoma (TCGA, Provisional)	R273C	3110.43
TCGA-22-4604-01	Lung Squamous Cell Carcinoma (TCGA, Provisional)	R196*	577.914
TCGA-22-4607-01	Lung Squamous Cell Carcinoma (TCGA, Provisional)	C176F	2028.7
TCGA-22-4613-01	Lung Squamous Cell Carcinoma (TCGA, Provisional)	Y236C	2118.58
TCGA-22-5471-01	Lung Squamous Cell Carcinoma (TCGA, Provisional)	R248W	3442.25
TCGA-22-5473-01	Lung Squamous Cell Carcinoma (TCGA, Provisional)	E298*	390.33
TCGA-22-5474-01	Lung Squamous Cell Carcinoma (TCGA, Provisional)	Y234S	3140.79
TCGA-22-5477-01	Lung Squamous Cell Carcinoma (TCGA, Provisional)	V157F	2945.93
TCGA-22-5478-01	Lung Squamous Cell Carcinoma (TCGA, Provisional)	R280I	1422.74
TCGA-22-5480-01	Lung Squamous Cell Carcinoma (TCGA, Provisional)	R110L	5120.99
TCGA-22-5482-01	Lung Squamous Cell Carcinoma (TCGA, Provisional)	X126_splice	2889.48
TCGA-22-5485-01	Lung Squamous Cell Carcinoma (TCGA, Provisional)	I162dup	5996.86
TCGA-22-5489-01	Lung Squamous Cell Carcinoma (TCGA, Provisional)	R306*	663.803
TCGA-22-5491-01	Lung Squamous Cell Carcinoma (TCGA, Provisional)	P151R	1704.29
TCGA-22-5492-01	Lung Squamous Cell Carcinoma (TCGA, Provisional)	E221*	453.123
TCGA-33-4532-01	Lung Squamous Cell Carcinoma (TCGA, Provisional)	M237I	4602.68
TCGA-33-4533-01	Lung Squamous Cell Carcinoma (TCGA, Provisional)	E298*	227.646
TCGA-33-4538-01	Lung Squamous Cell Carcinoma (TCGA, Provisional)	H214R	4214.97
TCGA-33-4547-01	Lung Squamous Cell Carcinoma (TCGA, Provisional)	E271K	1507.3
TCGA-33-4566-01	Lung Squamous Cell Carcinoma (TCGA, Provisional)	K164E	2315.79
TCGA-33-4582-01	Lung Squamous Cell Carcinoma (TCGA, Provisional)	P278S	896.363
TCGA-33-4583-01	Lung Squamous Cell Carcinoma (TCGA, Provisional)	R249W, R158L	4727.97
TCGA-33-4586-01	Lung Squamous Cell Carcinoma (TCGA, Provisional)	R248Q	2471.37
TCGA-33-6737-01	Lung Squamous Cell Carcinoma (TCGA, Provisional)	T284P, L111Q	1098.27
TCGA-34-2596-01	Lung Squamous Cell Carcinoma (TCGA, Provisional)	K305*	459.207
TCGA-34-2600-01	Lung Squamous Cell Carcinoma (TCGA, Provisional)	G266V	2530.45
TCGA-34-2608-01	Lung Squamous Cell Carcinoma (TCGA, Provisional)	R158L	1664.06
TCGA-34-5232-01	Lung Squamous Cell Carcinoma (TCGA, Provisional)	D281Y	1950.09
TCGA-34-5236-01	Lung Squamous Cell Carcinoma (TCGA, Provisional)	K132R	1488.07
TCGA-34-5239-01	Lung Squamous Cell Carcinoma (TCGA, Provisional)	X125_splice	865.572
TCGA-34-5240-01	Lung Squamous Cell Carcinoma (TCGA, Provisional)	G245S	1521.25
TCGA-34-5927-01	Lung Squamous Cell Carcinoma (TCGA, Provisional)	S183*	423.864
TCGA-34-5928-01	Lung Squamous Cell Carcinoma (TCGA, Provisional)	G262V	3356.41
TCGA-34-5929-01	Lung Squamous Cell Carcinoma (TCGA, Provisional)	R282W	7873.19
TCGA-37-3783-01	Lung Squamous Cell Carcinoma (TCGA, Provisional)	R273H	717.514
TCGA-37-3789-01	Lung Squamous Cell Carcinoma (TCGA, Provisional)	R65*	223.334
TCGA-37-4133-01	Lung Squamous Cell Carcinoma (TCGA, Provisional)	V218del	1869.85
TCGA-37-4135-01	Lung Squamous Cell Carcinoma (TCGA, Provisional)	E68*	381.077
TCGA-37-4141-01	Lung Squamous Cell Carcinoma (TCGA, Provisional)	C242F	2287.32
TCGA-37-5819-01	Lung Squamous Cell Carcinoma (TCGA, Provisional)	C242F	2191.3
TCGA-39-5016-01	Lung Squamous Cell Carcinoma (TCGA, Provisional)	R175G	2402.5
TCGA-39-5019-01	Lung Squamous Cell Carcinoma (TCGA, Provisional)	E271*	418.297
TCGA-39-5021-01	Lung Squamous Cell Carcinoma (TCGA, Provisional)	C141W	2178.83
TCGA-39-5024-01	Lung Squamous Cell Carcinoma (TCGA, Provisional)	X307_splice	491.325
TCGA-39-5027-01	Lung Squamous Cell Carcinoma (TCGA, Provisional)	F270I	2461.4
TCGA-39-5028-01	Lung Squamous Cell Carcinoma (TCGA, Provisional)	P278L	1086.74
TCGA-39-5029-01	Lung Squamous Cell Carcinoma (TCGA, Provisional)	R213*	353.982
TCGA-39-5031-01	Lung Squamous Cell Carcinoma (TCGA, Provisional)	Y103*	535.206
TCGA-39-5035-01	Lung Squamous Cell Carcinoma (TCGA, Provisional)	R158H	2687.19
TCGA-39-5036-01	Lung Squamous Cell Carcinoma (TCGA, Provisional)	Q144Tfs*5	242.106
TCGA-39-5037-01	Lung Squamous Cell Carcinoma (TCGA, Provisional)	H179D	2385.48
TCGA-43-3394-01	Lung Squamous Cell Carcinoma (TCGA, Provisional)	S315Lfs*30	484.767
TCGA-43-3920-01	Lung Squamous Cell Carcinoma (TCGA, Provisional)	H193L	1613.53
TCGA-43-5668-01	Lung Squamous Cell Carcinoma (TCGA, Provisional)	R273L	2547.37
TCGA-43-6143-01	Lung Squamous Cell Carcinoma (TCGA, Provisional)	H214R	2792.36
TCGA-43-6770-01	Lung Squamous Cell Carcinoma (TCGA, Provisional)	Y205C	4460.64
TCGA-46-3767-01	Lung Squamous Cell Carcinoma (TCGA, Provisional)	H193R	2093.98
TCGA-46-3768-01	Lung Squamous Cell Carcinoma (TCGA, Provisional)	R248P	2628.54
TCGA-46-3769-01	Lung Squamous Cell Carcinoma (TCGA, Provisional)	D207Mfs*40	237.575
TCGA-46-6025-01	Lung Squamous Cell Carcinoma (TCGA, Provisional)	V172F	2888.93
TCGA-46-6026-01	Lung Squamous Cell Carcinoma (TCGA, Provisional)	L252_I254del	3149.94
TCGA-51-4079-01	Lung Squamous Cell Carcinoma (TCGA, Provisional)	D48Tfs*75	418.749
TCGA-51-4080-01	Lung Squamous Cell Carcinoma (TCGA, Provisional)	R337L	1907.11
TCGA-51-4081-01	Lung Squamous Cell Carcinoma (TCGA, Provisional)	G154V, R273L	3721.41
TCGA-56-1622-01	Lung Squamous Cell Carcinoma (TCGA, Provisional)	R337L	3307.13
TCGA-56-5897-01	Lung Squamous Cell Carcinoma (TCGA, Provisional)	R213*	747.555
TCGA-56-5898-01	Lung Squamous Cell Carcinoma (TCGA, Provisional)	Y163C	1914.59
TCGA-56-6545-01	Lung Squamous Cell Carcinoma (TCGA, Provisional)	V157F	3567.07
TCGA-56-6546-01	Lung Squamous Cell Carcinoma (TCGA, Provisional)	H179Y	2790.33
TCGA-60-2698-01	Lung Squamous Cell Carcinoma (TCGA, Provisional)	R213*	618.644
TCGA-60-2707-01	Lung Squamous Cell Carcinoma (TCGA, Provisional)	L35Cfs*9	1012.44
TCGA-60-2708-01	Lung Squamous Cell Carcinoma (TCGA, Provisional)	G154Afs*16	583.874
TCGA-60-2710-01	Lung Squamous Cell Carcinoma (TCGA, Provisional)	G244D	2275.91
TCGA-60-2711-01	Lung Squamous Cell Carcinoma (TCGA, Provisional)	L265Tfs*7	302.678
TCGA-60-2713-01	Lung Squamous Cell Carcinoma (TCGA, Provisional)	V73Wfs*50	529.263
TCGA-60-2719-01	Lung Squamous Cell Carcinoma (TCGA, Provisional)	H193D	3516.57
TCGA-60-2720-01	Lung Squamous Cell Carcinoma (TCGA, Provisional)	Y220C	2113.75
TCGA-60-2721-01	Lung Squamous Cell Carcinoma (TCGA, Provisional)	E204*	431.97
TCGA-60-2722-01	Lung Squamous Cell Carcinoma (TCGA, Provisional)	H179R	1687.46
TCGA-60-2723-01	Lung Squamous Cell Carcinoma (TCGA, Provisional)	X224_splice	492.208
TCGA-60-2724-01	Lung Squamous Cell Carcinoma (TCGA, Provisional)	G244C	987.325
TCGA-63-5128-01	Lung Squamous Cell Carcinoma (TCGA, Provisional)	K320Rfs*22	345.801
TCGA-63-5131-01	Lung Squamous Cell Carcinoma (TCGA, Provisional)	R158L	1772.2
TCGA-63-6202-01	Lung Squamous Cell Carcinoma (TCGA, Provisional)	R158L	1590.73
TCGA-66-2727-01	Lung Squamous Cell Carcinoma (TCGA, Provisional)	Y234C	2032.52
TCGA-66-2734-01	Lung Squamous Cell Carcinoma (TCGA, Provisional)	R249S	1647.29
TCGA-66-2742-01	Lung Squamous Cell Carcinoma (TCGA, Provisional)	L348F, E349*	815.625
TCGA-66-2744-01	Lung Squamous Cell Carcinoma (TCGA, Provisional)	R175G	2850.44
TCGA-66-2754-01	Lung Squamous Cell Carcinoma (TCGA, Provisional)	Q331H	181.736
TCGA-66-2755-01	Lung Squamous Cell Carcinoma (TCGA, Provisional)	R273P	5621.84
TCGA-66-2756-01	Lung Squamous Cell Carcinoma (TCGA, Provisional)	R175G	3203.42
TCGA-66-2757-01	Lung Squamous Cell Carcinoma (TCGA, Provisional)	L111R	4179.53
TCGA-66-2758-01	Lung Squamous Cell Carcinoma (TCGA, Provisional)	T125P	2484.56
TCGA-66-2759-01	Lung Squamous Cell Carcinoma (TCGA, Provisional)	R249G	2404.42
TCGA-66-2763-01	Lung Squamous Cell Carcinoma (TCGA, Provisional)	P278A	2810.28
TCGA-66-2765-01	Lung Squamous Cell Carcinoma (TCGA, Provisional)	X331_splice	495.936
TCGA-66-2766-01	Lung Squamous Cell Carcinoma (TCGA, Provisional)	H193L	1949.68
TCGA-66-2767-01	Lung Squamous Cell Carcinoma (TCGA, Provisional)	X261_splice	1859.95
TCGA-66-2768-01	Lung Squamous Cell Carcinoma (TCGA, Provisional)	Y163C	1076.58
TCGA-66-2770-01	Lung Squamous Cell Carcinoma (TCGA, Provisional)	R267P	2894.86
TCGA-66-2777-01	Lung Squamous Cell Carcinoma (TCGA, Provisional)	R248L	1628.65
TCGA-66-2782-01	Lung Squamous Cell Carcinoma (TCGA, Provisional)	E287*	402.079
TCGA-66-2783-01	Lung Squamous Cell Carcinoma (TCGA, Provisional)	X332_splice	633.54
TCGA-66-2786-01	Lung Squamous Cell Carcinoma (TCGA, Provisional)	R158G	2147.75
TCGA-66-2787-01	Lung Squamous Cell Carcinoma (TCGA, Provisional)	R158Afs*12	331.615
TCGA-66-2788-01	Lung Squamous Cell Carcinoma (TCGA, Provisional)	X125_splice	491.58
TCGA-66-2791-01	Lung Squamous Cell Carcinoma (TCGA, Provisional)	G245V	2020.97
TCGA-66-2792-01	Lung Squamous Cell Carcinoma (TCGA, Provisional)	R267P, R306*	364.078
TCGA-66-2793-01	Lung Squamous Cell Carcinoma (TCGA, Provisional)	H179L	3637.72
TCGA-66-2794-01	Lung Squamous Cell Carcinoma (TCGA, Provisional)	P278R	4837.11
TCGA-66-2795-01	Lung Squamous Cell Carcinoma (TCGA, Provisional)	R158L	2332.44
TCGA-66-2800-01	Lung Squamous Cell Carcinoma (TCGA, Provisional)	G245V	1890.55
TCGA-70-6723-01	Lung Squamous Cell Carcinoma (TCGA, Provisional)	X187_splice	499.745
TCGA-85-6560-01	Lung Squamous Cell Carcinoma (TCGA, Provisional)	C135W	2598.88
TCGA-85-6561-01	Lung Squamous Cell Carcinoma (TCGA, Provisional)	R283P	3225.98
TCGA-21-1072-01	Lung Squamous Cell Carcinoma (TCGA, Provisional)	Not Sequenced	4045.74
TCGA-21-1075-01	Lung Squamous Cell Carcinoma (TCGA, Provisional)	Not Sequenced	204.626
TCGA-21-1079-01	Lung Squamous Cell Carcinoma (TCGA, Provisional)	Not Sequenced	1751.9
TCGA-21-1080-01	Lung Squamous Cell Carcinoma (TCGA, Provisional)	Not Sequenced	1816.32
TCGA-21-1082-01	Lung Squamous Cell Carcinoma (TCGA, Provisional)	Not Sequenced	3689.5
TCGA-21-1083-01	Lung Squamous Cell Carcinoma (TCGA, Provisional)	Not Sequenced	2323.74
TCGA-21-5783-01	Lung Squamous Cell Carcinoma (TCGA, Provisional)	Not Sequenced	2788.42
TCGA-21-A5DI-01	Lung Squamous Cell Carcinoma (TCGA, Provisional)	Not Sequenced	810.417
TCGA-22-0940-01	Lung Squamous Cell Carcinoma (TCGA, Provisional)	Not Sequenced	704.188
TCGA-22-1000-01	Lung Squamous Cell Carcinoma (TCGA, Provisional)	Not Sequenced	1476.48
TCGA-22-1005-01	Lung Squamous Cell Carcinoma (TCGA, Provisional)	Not Sequenced	1493.6
TCGA-22-1017-01	Lung Squamous Cell Carcinoma (TCGA, Provisional)	Not Sequenced	1884.14
TCGA-22-4594-01	Lung Squamous Cell Carcinoma (TCGA, Provisional)	Not Sequenced	1740.71
TCGA-22-4596-01	Lung Squamous Cell Carcinoma (TCGA, Provisional)	Not Sequenced	1197.7
TCGA-22-4605-01	Lung Squamous Cell Carcinoma (TCGA, Provisional)	Not Sequenced	577.801
TCGA-22-4609-01	Lung Squamous Cell Carcinoma (TCGA, Provisional)	Not Sequenced	605.629
TCGA-22-5479-01	Lung Squamous Cell Carcinoma (TCGA, Provisional)	Not Sequenced	419.931
TCGA-22-5481-01	Lung Squamous Cell Carcinoma (TCGA, Provisional)	Not Sequenced	4693.39
TCGA-22-5483-01	Lung Squamous Cell Carcinoma (TCGA, Provisional)	Not Sequenced	527.18
TCGA-22-A5C4-01	Lung Squamous Cell Carcinoma (TCGA, Provisional)	Not Sequenced	194.149
TCGA-33-4587-01	Lung Squamous Cell Carcinoma (TCGA, Provisional)	Not Sequenced	6375.5
TCGA-33-4589-01	Lung Squamous Cell Carcinoma (TCGA, Provisional)	Not Sequenced	99.3377
TCGA-33-6738-01	Lung Squamous Cell Carcinoma (TCGA, Provisional)	Not Sequenced	223.019
TCGA-33-A4WN-01	Lung Squamous Cell Carcinoma (TCGA, Provisional)	Not Sequenced	2578.8
TCGA-33-A5GW-01	Lung Squamous Cell Carcinoma (TCGA, Provisional)	Not Sequenced	723.389
TCGA-33-AAS8-01	Lung Squamous Cell Carcinoma (TCGA, Provisional)	Not Sequenced	2183.22
TCGA-33-AASB-01	Lung Squamous Cell Carcinoma (TCGA, Provisional)	Not Sequenced	2129.53
TCGA-33-AASD-01	Lung Squamous Cell Carcinoma (TCGA, Provisional)	Not Sequenced	765.919
TCGA-33-AASI-01	Lung Squamous Cell Carcinoma (TCGA, Provisional)	Not Sequenced	3253.64
TCGA-33-AASJ-01	Lung Squamous Cell Carcinoma (TCGA, Provisional)	Not Sequenced	425.791
TCGA-33-AASL-01	Lung Squamous Cell Carcinoma (TCGA, Provisional)	Not Sequenced	1542.37
TCGA-34-7107-01	Lung Squamous Cell Carcinoma (TCGA, Provisional)	Not Sequenced	3955.67
TCGA-34-8454-01	Lung Squamous Cell Carcinoma (TCGA, Provisional)	Not Sequenced	1538.81
TCGA-34-8455-01	Lung Squamous Cell Carcinoma (TCGA, Provisional)	Not Sequenced	1122.72
TCGA-34-8456-01	Lung Squamous Cell Carcinoma (TCGA, Provisional)	Not Sequenced	1385.46
TCGA-34-A5IX-01	Lung Squamous Cell Carcinoma (TCGA, Provisional)	Not Sequenced	1347.41
TCGA-37-3792-01	Lung Squamous Cell Carcinoma (TCGA, Provisional)	Not Sequenced	1953.22
TCGA-37-4129-01	Lung Squamous Cell Carcinoma (TCGA, Provisional)	Not Sequenced	375.045
TCGA-37-4130-01	Lung Squamous Cell Carcinoma (TCGA, Provisional)	Not Sequenced	1207.47
TCGA-37-4132-01	Lung Squamous Cell Carcinoma (TCGA, Provisional)	Not Sequenced	1275.52
TCGA-37-A5EL-01	Lung Squamous Cell Carcinoma (TCGA, Provisional)	Not Sequenced	1982.66
TCGA-37-A5EM-01	Lung Squamous Cell Carcinoma (TCGA, Provisional)	Not Sequenced	1701.41
TCGA-37-A5EN-01	Lung Squamous Cell Carcinoma (TCGA, Provisional)	Not Sequenced	1485.71
TCGA-39-5011-01	Lung Squamous Cell Carcinoma (TCGA, Provisional)	Not Sequenced	3257.51
TCGA-39-5034-01	Lung Squamous Cell Carcinoma (TCGA, Provisional)	Not Sequenced	302.158
TCGA-39-5040-01	Lung Squamous Cell Carcinoma (TCGA, Provisional)	Not Sequenced	430.478
TCGA-43-2576-01	Lung Squamous Cell Carcinoma (TCGA, Provisional)	Not Sequenced	1337.87
TCGA-43-2581-01	Lung Squamous Cell Carcinoma (TCGA, Provisional)	Not Sequenced	1336.57
TCGA-43-5670-01	Lung Squamous Cell Carcinoma (TCGA, Provisional)	Not Sequenced	1873.43
TCGA-43-6773-01	Lung Squamous Cell Carcinoma (TCGA, Provisional)	Not Sequenced	2125.99
TCGA-43-7656-01	Lung Squamous Cell Carcinoma (TCGA, Provisional)	Not Sequenced	2731.89
TCGA-43-7657-01	Lung Squamous Cell Carcinoma (TCGA, Provisional)	Not Sequenced	3862.06
TCGA-43-7658-01	Lung Squamous Cell Carcinoma (TCGA, Provisional)	Not Sequenced	5925.66
TCGA-43-8115-01	Lung Squamous Cell Carcinoma (TCGA, Provisional)	Not Sequenced	1136.54
TCGA-43-8116-01	Lung Squamous Cell Carcinoma (TCGA, Provisional)	Not Sequenced	2568.5
TCGA-43-8118-01	Lung Squamous Cell Carcinoma (TCGA, Provisional)	Not Sequenced	1157.75
TCGA-43-A474-01	Lung Squamous Cell Carcinoma (TCGA, Provisional)	Not Sequenced	255.399
TCGA-43-A475-01	Lung Squamous Cell Carcinoma (TCGA, Provisional)	Not Sequenced	1711.86
TCGA-43-A56U-01	Lung Squamous Cell Carcinoma (TCGA, Provisional)	Not Sequenced	793.965
TCGA-43-A56V-01	Lung Squamous Cell Carcinoma (TCGA, Provisional)	Not Sequenced	1223.35
TCGA-51-6867-01	Lung Squamous Cell Carcinoma (TCGA, Provisional)	Not Sequenced	1719.89
TCGA-52-7622-01	Lung Squamous Cell Carcinoma (TCGA, Provisional)	Not Sequenced	1295.85
TCGA-52-7809-01	Lung Squamous Cell Carcinoma (TCGA, Provisional)	Not Sequenced	3172.24
TCGA-52-7810-01	Lung Squamous Cell Carcinoma (TCGA, Provisional)	Not Sequenced	219.032
TCGA-52-7811-01	Lung Squamous Cell Carcinoma (TCGA, Provisional)	Not Sequenced	394.375
TCGA-52-7812-01	Lung Squamous Cell Carcinoma (TCGA, Provisional)	Not Sequenced	2497.6
TCGA-56-7221-01	Lung Squamous Cell Carcinoma (TCGA, Provisional)	Not Sequenced	2141.13
TCGA-56-7222-01	Lung Squamous Cell Carcinoma (TCGA, Provisional)	Not Sequenced	235.582
TCGA-56-7223-01	Lung Squamous Cell Carcinoma (TCGA, Provisional)	Not Sequenced	2697.97
TCGA-56-7579-01	Lung Squamous Cell Carcinoma (TCGA, Provisional)	Not Sequenced	705.624
TCGA-56-7580-01	Lung Squamous Cell Carcinoma (TCGA, Provisional)	Not Sequenced	601.831
TCGA-56-7582-01	Lung Squamous Cell Carcinoma (TCGA, Provisional)	Not Sequenced	378.665
TCGA-56-7730-01	Lung Squamous Cell Carcinoma (TCGA, Provisional)	Not Sequenced	2571.56
TCGA-56-7731-01	Lung Squamous Cell Carcinoma (TCGA, Provisional)	Not Sequenced	1479.46
TCGA-56-7822-01	Lung Squamous Cell Carcinoma (TCGA, Provisional)	Not Sequenced	1189.35
TCGA-56-7823-01	Lung Squamous Cell Carcinoma (TCGA, Provisional)	Not Sequenced	189.707
TCGA-56-8082-01	Lung Squamous Cell Carcinoma (TCGA, Provisional)	Not Sequenced	4030.18
TCGA-56-8083-01	Lung Squamous Cell Carcinoma (TCGA, Provisional)	Not Sequenced	560.082
TCGA-56-8201-01	Lung Squamous Cell Carcinoma (TCGA, Provisional)	Not Sequenced	3298.85
TCGA-56-8304-01	Lung Squamous Cell Carcinoma (TCGA, Provisional)	Not Sequenced	2407.06
TCGA-56-8305-01	Lung Squamous Cell Carcinoma (TCGA, Provisional)	Not Sequenced	2495.85
TCGA-56-8307-01	Lung Squamous Cell Carcinoma (TCGA, Provisional)	Not Sequenced	357.143
TCGA-56-8308-01	Lung Squamous Cell Carcinoma (TCGA, Provisional)	Not Sequenced	1776.12
TCGA-56-8309-01	Lung Squamous Cell Carcinoma (TCGA, Provisional)	Not Sequenced	1786.82
TCGA-56-8503-01	Lung Squamous Cell Carcinoma (TCGA, Provisional)	Not Sequenced	1953.55
TCGA-56-8504-01	Lung Squamous Cell Carcinoma (TCGA, Provisional)	Not Sequenced	2802.26
TCGA-56-8622-01	Lung Squamous Cell Carcinoma (TCGA, Provisional)	Not Sequenced	805.465
TCGA-56-8623-01	Lung Squamous Cell Carcinoma (TCGA, Provisional)	Not Sequenced	681.711
TCGA-56-8624-01	Lung Squamous Cell Carcinoma (TCGA, Provisional)	Not Sequenced	680.328
TCGA-56-8625-01	Lung Squamous Cell Carcinoma (TCGA, Provisional)	Not Sequenced	1567.98
TCGA-56-8626-01	Lung Squamous Cell Carcinoma (TCGA, Provisional)	Not Sequenced	1096.32
TCGA-56-8628-01	Lung Squamous Cell Carcinoma (TCGA, Provisional)	Not Sequenced	624.748
TCGA-56-8629-01	Lung Squamous Cell Carcinoma (TCGA, Provisional)	Not Sequenced	1401.58
TCGA-56-A49D-01	Lung Squamous Cell Carcinoma (TCGA, Provisional)	Not Sequenced	1179.36
TCGA-56-A4BW-01	Lung Squamous Cell Carcinoma (TCGA, Provisional)	Not Sequenced	1526.65
TCGA-56-A4BX-01	Lung Squamous Cell Carcinoma (TCGA, Provisional)	Not Sequenced	153.404
TCGA-56-A4BY-01	Lung Squamous Cell Carcinoma (TCGA, Provisional)	Not Sequenced	1012
TCGA-56-A4ZJ-01	Lung Squamous Cell Carcinoma (TCGA, Provisional)	Not Sequenced	669.647
TCGA-56-A4ZK-01	Lung Squamous Cell Carcinoma (TCGA, Provisional)	Not Sequenced	500.85
TCGA-56-A5DR-01	Lung Squamous Cell Carcinoma (TCGA, Provisional)	Not Sequenced	1944.49
TCGA-56-A5DS-01	Lung Squamous Cell Carcinoma (TCGA, Provisional)	Not Sequenced	958.479
TCGA-56-A62T-01	Lung Squamous Cell Carcinoma (TCGA, Provisional)	Not Sequenced	275.508
TCGA-58-8386-01	Lung Squamous Cell Carcinoma (TCGA, Provisional)	Not Sequenced	1070.57
TCGA-58-8387-01	Lung Squamous Cell Carcinoma (TCGA, Provisional)	Not Sequenced	314.166
TCGA-58-8388-01	Lung Squamous Cell Carcinoma (TCGA, Provisional)	Not Sequenced	602.245
TCGA-58-8390-01	Lung Squamous Cell Carcinoma (TCGA, Provisional)	Not Sequenced	2659.2
TCGA-58-8391-01	Lung Squamous Cell Carcinoma (TCGA, Provisional)	Not Sequenced	2816.53
TCGA-58-8392-01	Lung Squamous Cell Carcinoma (TCGA, Provisional)	Not Sequenced	2147.39
TCGA-58-8393-01	Lung Squamous Cell Carcinoma (TCGA, Provisional)	Not Sequenced	1589.05
TCGA-58-A46J-01	Lung Squamous Cell Carcinoma (TCGA, Provisional)	Not Sequenced	2985.19
TCGA-58-A46K-01	Lung Squamous Cell Carcinoma (TCGA, Provisional)	Not Sequenced	3007.32
TCGA-58-A46L-01	Lung Squamous Cell Carcinoma (TCGA, Provisional)	Not Sequenced	890.535
TCGA-58-A46M-01	Lung Squamous Cell Carcinoma (TCGA, Provisional)	Not Sequenced	202.596
TCGA-58-A46N-01	Lung Squamous Cell Carcinoma (TCGA, Provisional)	Not Sequenced	129.152
TCGA-60-2695-01	Lung Squamous Cell Carcinoma (TCGA, Provisional)	Not Sequenced	825.078
TCGA-60-2696-01	Lung Squamous Cell Carcinoma (TCGA, Provisional)	Not Sequenced	1823.4
TCGA-60-2697-01	Lung Squamous Cell Carcinoma (TCGA, Provisional)	Not Sequenced	1311.22
TCGA-60-2703-01	Lung Squamous Cell Carcinoma (TCGA, Provisional)	Not Sequenced	2112.78
TCGA-60-2704-01	Lung Squamous Cell Carcinoma (TCGA, Provisional)	Not Sequenced	666.792
TCGA-60-2706-01	Lung Squamous Cell Carcinoma (TCGA, Provisional)	Not Sequenced	352.025
TCGA-60-2714-01	Lung Squamous Cell Carcinoma (TCGA, Provisional)	Not Sequenced	1939.03
TCGA-60-2716-01	Lung Squamous Cell Carcinoma (TCGA, Provisional)	Not Sequenced	6598.92
TCGA-63-7020-01	Lung Squamous Cell Carcinoma (TCGA, Provisional)	Not Sequenced	1347.58
TCGA-63-7021-01	Lung Squamous Cell Carcinoma (TCGA, Provisional)	Not Sequenced	982.175
TCGA-63-7022-01	Lung Squamous Cell Carcinoma (TCGA, Provisional)	Not Sequenced	2194.78
TCGA-63-7023-01	Lung Squamous Cell Carcinoma (TCGA, Provisional)	Not Sequenced	114.177
TCGA-63-A5M9-01	Lung Squamous Cell Carcinoma (TCGA, Provisional)	Not Sequenced	1058.36
TCGA-63-A5MB-01	Lung Squamous Cell Carcinoma (TCGA, Provisional)	Not Sequenced	1245.19
TCGA-63-A5MG-01	Lung Squamous Cell Carcinoma (TCGA, Provisional)	Not Sequenced	1868.43
TCGA-63-A5MH-01	Lung Squamous Cell Carcinoma (TCGA, Provisional)	Not Sequenced	2219
TCGA-63-A5MI-01	Lung Squamous Cell Carcinoma (TCGA, Provisional)	Not Sequenced	313.115
TCGA-63-A5MJ-01	Lung Squamous Cell Carcinoma (TCGA, Provisional)	Not Sequenced	1731.03
TCGA-63-A5ML-01	Lung Squamous Cell Carcinoma (TCGA, Provisional)	Not Sequenced	1121.5
TCGA-63-A5MM-01	Lung Squamous Cell Carcinoma (TCGA, Provisional)	Not Sequenced	1928.47
TCGA-63-A5MN-01	Lung Squamous Cell Carcinoma (TCGA, Provisional)	Not Sequenced	878.678
TCGA-63-A5MP-01	Lung Squamous Cell Carcinoma (TCGA, Provisional)	Not Sequenced	380.794
TCGA-63-A5MR-01	Lung Squamous Cell Carcinoma (TCGA, Provisional)	Not Sequenced	894.013
TCGA-63-A5MS-01	Lung Squamous Cell Carcinoma (TCGA, Provisional)	Not Sequenced	394.096
TCGA-63-A5MT-01	Lung Squamous Cell Carcinoma (TCGA, Provisional)	Not Sequenced	296.752
TCGA-63-A5MU-01	Lung Squamous Cell Carcinoma (TCGA, Provisional)	Not Sequenced	1373.77
TCGA-63-A5MV-01	Lung Squamous Cell Carcinoma (TCGA, Provisional)	Not Sequenced	340.601
TCGA-63-A5MW-01	Lung Squamous Cell Carcinoma (TCGA, Provisional)	Not Sequenced	1198.25
TCGA-63-A5MY-01	Lung Squamous Cell Carcinoma (TCGA, Provisional)	Not Sequenced	1019.7
TCGA-66-2737-01	Lung Squamous Cell Carcinoma (TCGA, Provisional)	Not Sequenced	2960.58
TCGA-66-2753-01	Lung Squamous Cell Carcinoma (TCGA, Provisional)	Not Sequenced	654.647
TCGA-66-2769-01	Lung Squamous Cell Carcinoma (TCGA, Provisional)	Not Sequenced	2335.98
TCGA-66-2790-01	Lung Squamous Cell Carcinoma (TCGA, Provisional)	Not Sequenced	2602.26
TCGA-68-7755-01	Lung Squamous Cell Carcinoma (TCGA, Provisional)	Not Sequenced	271.317
TCGA-68-7756-01	Lung Squamous Cell Carcinoma (TCGA, Provisional)	Not Sequenced	499.657
TCGA-68-7757-01	Lung Squamous Cell Carcinoma (TCGA, Provisional)	Not Sequenced	2030.96
TCGA-68-8250-01	Lung Squamous Cell Carcinoma (TCGA, Provisional)	Not Sequenced	530.756
TCGA-68-8251-01	Lung Squamous Cell Carcinoma (TCGA, Provisional)	Not Sequenced	391.649
TCGA-68-A59I-01	Lung Squamous Cell Carcinoma (TCGA, Provisional)	Not Sequenced	968.046
TCGA-68-A59J-01	Lung Squamous Cell Carcinoma (TCGA, Provisional)	Not Sequenced	1614
TCGA-6A-AB49-01	Lung Squamous Cell Carcinoma (TCGA, Provisional)	Not Sequenced	26.7583
TCGA-77-6842-01	Lung Squamous Cell Carcinoma (TCGA, Provisional)	Not Sequenced	2871.78
TCGA-77-6843-01	Lung Squamous Cell Carcinoma (TCGA, Provisional)	Not Sequenced	3918.78
TCGA-77-6844-01	Lung Squamous Cell Carcinoma (TCGA, Provisional)	Not Sequenced	336.261
TCGA-77-6845-01	Lung Squamous Cell Carcinoma (TCGA, Provisional)	Not Sequenced	269.432
TCGA-77-7138-01	Lung Squamous Cell Carcinoma (TCGA, Provisional)	Not Sequenced	759.253
TCGA-77-7139-01	Lung Squamous Cell Carcinoma (TCGA, Provisional)	Not Sequenced	1255.61
TCGA-77-7140-01	Lung Squamous Cell Carcinoma (TCGA, Provisional)	Not Sequenced	3862.15
TCGA-77-7141-01	Lung Squamous Cell Carcinoma (TCGA, Provisional)	Not Sequenced	1591.61
TCGA-77-7142-01	Lung Squamous Cell Carcinoma (TCGA, Provisional)	Not Sequenced	3267.83
TCGA-77-7335-01	Lung Squamous Cell Carcinoma (TCGA, Provisional)	Not Sequenced	1705.82
TCGA-77-7337-01	Lung Squamous Cell Carcinoma (TCGA, Provisional)	Not Sequenced	2354.32
TCGA-77-7338-01	Lung Squamous Cell Carcinoma (TCGA, Provisional)	Not Sequenced	1458.6
TCGA-77-7463-01	Lung Squamous Cell Carcinoma (TCGA, Provisional)	Not Sequenced	334.544
TCGA-77-7465-01	Lung Squamous Cell Carcinoma (TCGA, Provisional)	Not Sequenced	2815.07
TCGA-77-8007-01	Lung Squamous Cell Carcinoma (TCGA, Provisional)	Not Sequenced	1411.15
TCGA-77-8008-01	Lung Squamous Cell Carcinoma (TCGA, Provisional)	Not Sequenced	924.019
TCGA-77-8009-01	Lung Squamous Cell Carcinoma (TCGA, Provisional)	Not Sequenced	2154.24
TCGA-77-8128-01	Lung Squamous Cell Carcinoma (TCGA, Provisional)	Not Sequenced	2401.18
TCGA-77-8130-01	Lung Squamous Cell Carcinoma (TCGA, Provisional)	Not Sequenced	466.102
TCGA-77-8131-01	Lung Squamous Cell Carcinoma (TCGA, Provisional)	Not Sequenced	1603.19
TCGA-77-8133-01	Lung Squamous Cell Carcinoma (TCGA, Provisional)	Not Sequenced	1741.3
TCGA-77-8136-01	Lung Squamous Cell Carcinoma (TCGA, Provisional)	Not Sequenced	1208.6
TCGA-77-8138-01	Lung Squamous Cell Carcinoma (TCGA, Provisional)	Not Sequenced	1991.47
TCGA-77-8139-01	Lung Squamous Cell Carcinoma (TCGA, Provisional)	Not Sequenced	2395.41
TCGA-77-8140-01	Lung Squamous Cell Carcinoma (TCGA, Provisional)	Not Sequenced	1552.43
TCGA-77-8143-01	Lung Squamous Cell Carcinoma (TCGA, Provisional)	Not Sequenced	227.548
TCGA-77-8144-01	Lung Squamous Cell Carcinoma (TCGA, Provisional)	Not Sequenced	2167.44
TCGA-77-8145-01	Lung Squamous Cell Carcinoma (TCGA, Provisional)	Not Sequenced	491.983
TCGA-77-8146-01	Lung Squamous Cell Carcinoma (TCGA, Provisional)	Not Sequenced	2747.54
TCGA-77-8148-01	Lung Squamous Cell Carcinoma (TCGA, Provisional)	Not Sequenced	3441.36
TCGA-77-8150-01	Lung Squamous Cell Carcinoma (TCGA, Provisional)	Not Sequenced	2950.7
TCGA-77-8153-01	Lung Squamous Cell Carcinoma (TCGA, Provisional)	Not Sequenced	926.804
TCGA-77-8154-01	Lung Squamous Cell Carcinoma (TCGA, Provisional)	Not Sequenced	2008.39
TCGA-77-8156-01	Lung Squamous Cell Carcinoma (TCGA, Provisional)	Not Sequenced	2117.69
TCGA-77-A5FZ-01	Lung Squamous Cell Carcinoma (TCGA, Provisional)	Not Sequenced	1457.31
TCGA-77-A5G1-01	Lung Squamous Cell Carcinoma (TCGA, Provisional)	Not Sequenced	1202.05
TCGA-77-A5G3-01	Lung Squamous Cell Carcinoma (TCGA, Provisional)	Not Sequenced	1266.64
TCGA-77-A5G6-01	Lung Squamous Cell Carcinoma (TCGA, Provisional)	Not Sequenced	2777.78
TCGA-77-A5G7-01	Lung Squamous Cell Carcinoma (TCGA, Provisional)	Not Sequenced	2181.93
TCGA-77-A5G8-01	Lung Squamous Cell Carcinoma (TCGA, Provisional)	Not Sequenced	1540.88
TCGA-77-A5GA-01	Lung Squamous Cell Carcinoma (TCGA, Provisional)	Not Sequenced	3486.66
TCGA-77-A5GB-01	Lung Squamous Cell Carcinoma (TCGA, Provisional)	Not Sequenced	843.008
TCGA-77-A5GF-01	Lung Squamous Cell Carcinoma (TCGA, Provisional)	Not Sequenced	4049.38
TCGA-77-A5GH-01	Lung Squamous Cell Carcinoma (TCGA, Provisional)	Not Sequenced	2000.59
TCGA-79-5596-01	Lung Squamous Cell Carcinoma (TCGA, Provisional)	Not Sequenced	371.797
TCGA-85-6798-01	Lung Squamous Cell Carcinoma (TCGA, Provisional)	Not Sequenced	4502.83
TCGA-85-7696-01	Lung Squamous Cell Carcinoma (TCGA, Provisional)	Not Sequenced	1654.74
TCGA-85-7697-01	Lung Squamous Cell Carcinoma (TCGA, Provisional)	Not Sequenced	1305.47
TCGA-85-7698-01	Lung Squamous Cell Carcinoma (TCGA, Provisional)	Not Sequenced	2872.99
TCGA-85-7699-01	Lung Squamous Cell Carcinoma (TCGA, Provisional)	Not Sequenced	2552.43
TCGA-85-7710-01	Lung Squamous Cell Carcinoma (TCGA, Provisional)	Not Sequenced	1504.53
TCGA-85-7843-01	Lung Squamous Cell Carcinoma (TCGA, Provisional)	Not Sequenced	1273.16
TCGA-85-7844-01	Lung Squamous Cell Carcinoma (TCGA, Provisional)	Not Sequenced	1685.64
TCGA-85-7950-01	Lung Squamous Cell Carcinoma (TCGA, Provisional)	Not Sequenced	7293.54
TCGA-85-8048-01	Lung Squamous Cell Carcinoma (TCGA, Provisional)	Not Sequenced	788.516
TCGA-85-8049-01	Lung Squamous Cell Carcinoma (TCGA, Provisional)	Not Sequenced	1455.54
TCGA-85-8052-01	Lung Squamous Cell Carcinoma (TCGA, Provisional)	Not Sequenced	1812.05
TCGA-85-8070-01	Lung Squamous Cell Carcinoma (TCGA, Provisional)	Not Sequenced	281.892
TCGA-85-8071-01	Lung Squamous Cell Carcinoma (TCGA, Provisional)	Not Sequenced	1680.09
TCGA-85-8072-01	Lung Squamous Cell Carcinoma (TCGA, Provisional)	Not Sequenced	2204.78
TCGA-85-8276-01	Lung Squamous Cell Carcinoma (TCGA, Provisional)	Not Sequenced	1339.99
TCGA-85-8277-01	Lung Squamous Cell Carcinoma (TCGA, Provisional)	Not Sequenced	3862.87
TCGA-85-8287-01	Lung Squamous Cell Carcinoma (TCGA, Provisional)	Not Sequenced	2368.74
TCGA-85-8288-01	Lung Squamous Cell Carcinoma (TCGA, Provisional)	Not Sequenced	419.527
TCGA-85-8350-01	Lung Squamous Cell Carcinoma (TCGA, Provisional)	Not Sequenced	476.555
TCGA-85-8351-01	Lung Squamous Cell Carcinoma (TCGA, Provisional)	Not Sequenced	2405.93
TCGA-85-8352-01	Lung Squamous Cell Carcinoma (TCGA, Provisional)	Not Sequenced	159.25
TCGA-85-8353-01	Lung Squamous Cell Carcinoma (TCGA, Provisional)	Not Sequenced	715.799
TCGA-85-8354-01	Lung Squamous Cell Carcinoma (TCGA, Provisional)	Not Sequenced	475.401
TCGA-85-8355-01	Lung Squamous Cell Carcinoma (TCGA, Provisional)	Not Sequenced	1326.44
TCGA-85-8479-01	Lung Squamous Cell Carcinoma (TCGA, Provisional)	Not Sequenced	345.392
TCGA-85-8481-01	Lung Squamous Cell Carcinoma (TCGA, Provisional)	Not Sequenced	346.226
TCGA-85-8580-01	Lung Squamous Cell Carcinoma (TCGA, Provisional)	Not Sequenced	3292.72
TCGA-85-8582-01	Lung Squamous Cell Carcinoma (TCGA, Provisional)	Not Sequenced	2220.11
TCGA-85-8584-01	Lung Squamous Cell Carcinoma (TCGA, Provisional)	Not Sequenced	1476.34
TCGA-85-8664-01	Lung Squamous Cell Carcinoma (TCGA, Provisional)	Not Sequenced	2338.74
TCGA-85-8666-01	Lung Squamous Cell Carcinoma (TCGA, Provisional)	Not Sequenced	445.81
TCGA-85-A4CL-01	Lung Squamous Cell Carcinoma (TCGA, Provisional)	Not Sequenced	1879.03
TCGA-85-A4CN-01	Lung Squamous Cell Carcinoma (TCGA, Provisional)	Not Sequenced	2159.79
TCGA-85-A4JB-01	Lung Squamous Cell Carcinoma (TCGA, Provisional)	Not Sequenced	474.122
TCGA-85-A4JC-01	Lung Squamous Cell Carcinoma (TCGA, Provisional)	Not Sequenced	1560.21
TCGA-85-A4PA-01	Lung Squamous Cell Carcinoma (TCGA, Provisional)	Not Sequenced	2379.43
TCGA-85-A4QQ-01	Lung Squamous Cell Carcinoma (TCGA, Provisional)	Not Sequenced	1005.4
TCGA-85-A4QR-01	Lung Squamous Cell Carcinoma (TCGA, Provisional)	Not Sequenced	1292.42
TCGA-85-A50M-01	Lung Squamous Cell Carcinoma (TCGA, Provisional)	Not Sequenced	353.227
TCGA-85-A50Z-01	Lung Squamous Cell Carcinoma (TCGA, Provisional)	Not Sequenced	1393.12
TCGA-85-A510-01	Lung Squamous Cell Carcinoma (TCGA, Provisional)	Not Sequenced	1803.21
TCGA-85-A511-01	Lung Squamous Cell Carcinoma (TCGA, Provisional)	Not Sequenced	2367.89
TCGA-85-A512-01	Lung Squamous Cell Carcinoma (TCGA, Provisional)	Not Sequenced	512.974
TCGA-85-A513-01	Lung Squamous Cell Carcinoma (TCGA, Provisional)	Not Sequenced	877.419
TCGA-85-A53L-01	Lung Squamous Cell Carcinoma (TCGA, Provisional)	Not Sequenced	524.609
TCGA-85-A5B5-01	Lung Squamous Cell Carcinoma (TCGA, Provisional)	Not Sequenced	1938.69
TCGA-90-6837-01	Lung Squamous Cell Carcinoma (TCGA, Provisional)	Not Sequenced	1385.48
TCGA-90-7766-01	Lung Squamous Cell Carcinoma (TCGA, Provisional)	Not Sequenced	1398.45
TCGA-90-7767-01	Lung Squamous Cell Carcinoma (TCGA, Provisional)	Not Sequenced	4247.1
TCGA-90-7769-01	Lung Squamous Cell Carcinoma (TCGA, Provisional)	Not Sequenced	2461.65
TCGA-90-7964-01	Lung Squamous Cell Carcinoma (TCGA, Provisional)	Not Sequenced	241.28
TCGA-90-A4ED-01	Lung Squamous Cell Carcinoma (TCGA, Provisional)	Not Sequenced	2812.04
TCGA-90-A4EE-01	Lung Squamous Cell Carcinoma (TCGA, Provisional)	Not Sequenced	3851.65
TCGA-90-A59Q-01	Lung Squamous Cell Carcinoma (TCGA, Provisional)	Not Sequenced	1115.56
TCGA-92-7340-01	Lung Squamous Cell Carcinoma (TCGA, Provisional)	Not Sequenced	669.173
TCGA-92-7341-01	Lung Squamous Cell Carcinoma (TCGA, Provisional)	Not Sequenced	269.215
TCGA-92-8063-01	Lung Squamous Cell Carcinoma (TCGA, Provisional)	Not Sequenced	3354.48
TCGA-92-8064-01	Lung Squamous Cell Carcinoma (TCGA, Provisional)	Not Sequenced	1374.7
TCGA-92-8065-01	Lung Squamous Cell Carcinoma (TCGA, Provisional)	Not Sequenced	440.899
TCGA-94-7033-01	Lung Squamous Cell Carcinoma (TCGA, Provisional)	Not Sequenced	2175.82
TCGA-94-7557-01	Lung Squamous Cell Carcinoma (TCGA, Provisional)	Not Sequenced	375.226
TCGA-94-7943-01	Lung Squamous Cell Carcinoma (TCGA, Provisional)	Not Sequenced	5190.04
TCGA-94-8035-01	Lung Squamous Cell Carcinoma (TCGA, Provisional)	Not Sequenced	2567.54
TCGA-94-8490-01	Lung Squamous Cell Carcinoma (TCGA, Provisional)	Not Sequenced	185.679
TCGA-94-8491-01	Lung Squamous Cell Carcinoma (TCGA, Provisional)	Not Sequenced	1877.99
TCGA-94-A4VJ-01	Lung Squamous Cell Carcinoma (TCGA, Provisional)	Not Sequenced	1716.86
TCGA-94-A5I4-01	Lung Squamous Cell Carcinoma (TCGA, Provisional)	Not Sequenced	322.481
TCGA-94-A5I6-01	Lung Squamous Cell Carcinoma (TCGA, Provisional)	Not Sequenced	579.123
TCGA-96-7544-01	Lung Squamous Cell Carcinoma (TCGA, Provisional)	Not Sequenced	1744.64
TCGA-96-7545-01	Lung Squamous Cell Carcinoma (TCGA, Provisional)	Not Sequenced	1713.55
TCGA-96-8169-01	Lung Squamous Cell Carcinoma (TCGA, Provisional)	Not Sequenced	653.303
TCGA-96-8170-01	Lung Squamous Cell Carcinoma (TCGA, Provisional)	Not Sequenced	424.469
TCGA-96-A4JK-01	Lung Squamous Cell Carcinoma (TCGA, Provisional)	Not Sequenced	2649.07
TCGA-96-A4JL-01	Lung Squamous Cell Carcinoma (TCGA, Provisional)	Not Sequenced	5108.65
TCGA-98-7454-01	Lung Squamous Cell Carcinoma (TCGA, Provisional)	Not Sequenced	1669.44
TCGA-98-8020-01	Lung Squamous Cell Carcinoma (TCGA, Provisional)	Not Sequenced	2206.92
TCGA-98-8021-01	Lung Squamous Cell Carcinoma (TCGA, Provisional)	Not Sequenced	397.067
TCGA-98-8022-01	Lung Squamous Cell Carcinoma (TCGA, Provisional)	Not Sequenced	2449.96
TCGA-98-8023-01	Lung Squamous Cell Carcinoma (TCGA, Provisional)	Not Sequenced	4828.26
TCGA-98-A538-01	Lung Squamous Cell Carcinoma (TCGA, Provisional)	Not Sequenced	258.575
TCGA-98-A539-01	Lung Squamous Cell Carcinoma (TCGA, Provisional)	Not Sequenced	451.949
TCGA-98-A53A-01	Lung Squamous Cell Carcinoma (TCGA, Provisional)	Not Sequenced	269.911
TCGA-98-A53B-01	Lung Squamous Cell Carcinoma (TCGA, Provisional)	Not Sequenced	325.145
TCGA-98-A53C-01	Lung Squamous Cell Carcinoma (TCGA, Provisional)	Not Sequenced	909.699
TCGA-98-A53D-01	Lung Squamous Cell Carcinoma (TCGA, Provisional)	Not Sequenced	897.831
TCGA-98-A53H-01	Lung Squamous Cell Carcinoma (TCGA, Provisional)	Not Sequenced	1064.8
TCGA-98-A53I-01	Lung Squamous Cell Carcinoma (TCGA, Provisional)	Not Sequenced	675.825
TCGA-98-A53J-01	Lung Squamous Cell Carcinoma (TCGA, Provisional)	Not Sequenced	1427.39
TCGA-J1-A4AH-01	Lung Squamous Cell Carcinoma (TCGA, Provisional)	Not Sequenced	1390.88
TCGA-L3-A4E7-01	Lung Squamous Cell Carcinoma (TCGA, Provisional)	Not Sequenced	1389.7
TCGA-L3-A524-01	Lung Squamous Cell Carcinoma (TCGA, Provisional)	Not Sequenced	2046.63
TCGA-LA-A446-01	Lung Squamous Cell Carcinoma (TCGA, Provisional)	Not Sequenced	870.02
TCGA-LA-A7SW-01	Lung Squamous Cell Carcinoma (TCGA, Provisional)	Not Sequenced	2211.95
TCGA-MF-A522-01	Lung Squamous Cell Carcinoma (TCGA, Provisional)	Not Sequenced	189.42
TCGA-NC-A5HD-01	Lung Squamous Cell Carcinoma (TCGA, Provisional)	Not Sequenced	1720.07
TCGA-NC-A5HE-01	Lung Squamous Cell Carcinoma (TCGA, Provisional)	Not Sequenced	864.464
TCGA-NC-A5HF-01	Lung Squamous Cell Carcinoma (TCGA, Provisional)	Not Sequenced	1414.05
TCGA-NC-A5HG-01	Lung Squamous Cell Carcinoma (TCGA, Provisional)	Not Sequenced	1434.75
TCGA-NC-A5HH-01	Lung Squamous Cell Carcinoma (TCGA, Provisional)	Not Sequenced	306.686
TCGA-NC-A5HI-01	Lung Squamous Cell Carcinoma (TCGA, Provisional)	Not Sequenced	2098.6
TCGA-NC-A5HJ-01	Lung Squamous Cell Carcinoma (TCGA, Provisional)	Not Sequenced	498.704
TCGA-NC-A5HK-01	Lung Squamous Cell Carcinoma (TCGA, Provisional)	Not Sequenced	1648.07
TCGA-NC-A5HL-01	Lung Squamous Cell Carcinoma (TCGA, Provisional)	Not Sequenced	392.803
TCGA-NC-A5HM-01	Lung Squamous Cell Carcinoma (TCGA, Provisional)	Not Sequenced	2302.22
TCGA-NC-A5HN-01	Lung Squamous Cell Carcinoma (TCGA, Provisional)	Not Sequenced	1093.53
TCGA-NC-A5HO-01	Lung Squamous Cell Carcinoma (TCGA, Provisional)	Not Sequenced	1508.68
TCGA-NC-A5HP-01	Lung Squamous Cell Carcinoma (TCGA, Provisional)	Not Sequenced	1315.09
TCGA-NC-A5HQ-01	Lung Squamous Cell Carcinoma (TCGA, Provisional)	Not Sequenced	1181
TCGA-NC-A5HR-01	Lung Squamous Cell Carcinoma (TCGA, Provisional)	Not Sequenced	242.442
TCGA-NC-A5HT-01	Lung Squamous Cell Carcinoma (TCGA, Provisional)	Not Sequenced	393.918
TCGA-NK-A5CR-01	Lung Squamous Cell Carcinoma (TCGA, Provisional)	Not Sequenced	1275.33
TCGA-NK-A5CT-01	Lung Squamous Cell Carcinoma (TCGA, Provisional)	Not Sequenced	771.383
TCGA-NK-A5CX-01	Lung Squamous Cell Carcinoma (TCGA, Provisional)	Not Sequenced	1726.37
TCGA-NK-A5D1-01	Lung Squamous Cell Carcinoma (TCGA, Provisional)	Not Sequenced	3619.74
TCGA-NK-A7XE-01	Lung Squamous Cell Carcinoma (TCGA, Provisional)	Not Sequenced	1692.79
TCGA-O2-A52N-01	Lung Squamous Cell Carcinoma (TCGA, Provisional)	Not Sequenced	921.858
TCGA-O2-A52Q-01	Lung Squamous Cell Carcinoma (TCGA, Provisional)	Not Sequenced	1322.65
TCGA-O2-A52S-01	Lung Squamous Cell Carcinoma (TCGA, Provisional)	Not Sequenced	2048.84
TCGA-O2-A52V-01	Lung Squamous Cell Carcinoma (TCGA, Provisional)	Not Sequenced	1557.31
TCGA-O2-A52W-01	Lung Squamous Cell Carcinoma (TCGA, Provisional)	Not Sequenced	2669
TCGA-O2-A5IB-01	Lung Squamous Cell Carcinoma (TCGA, Provisional)	Not Sequenced	2436.1
TCGA-XC-AA0X-01	Lung Squamous Cell Carcinoma (TCGA, Provisional)	Not Sequenced	1233.46
TCGA-BA-4077-01	Head and Neck Squamous Cell Carcinoma (TCGA, Provisional)	Not Mutated	1929.26
TCGA-BA-5149-01	Head and Neck Squamous Cell Carcinoma (TCGA, Provisional)	Not Mutated	165.298
TCGA-BA-5153-01	Head and Neck Squamous Cell Carcinoma (TCGA, Provisional)	Not Mutated	4120.97
TCGA-BA-5556-01	Head and Neck Squamous Cell Carcinoma (TCGA, Provisional)	Not Mutated	2147.77
TCGA-BA-5559-01	Head and Neck Squamous Cell Carcinoma (TCGA, Provisional)	Not Mutated	3688.47
TCGA-BA-6871-01	Head and Neck Squamous Cell Carcinoma (TCGA, Provisional)	Not Mutated	954.984
TCGA-BB-4223-01	Head and Neck Squamous Cell Carcinoma (TCGA, Provisional)	Not Mutated	3894.55
TCGA-BB-4225-01	Head and Neck Squamous Cell Carcinoma (TCGA, Provisional)	Not Mutated	5118.06
TCGA-BB-4228-01	Head and Neck Squamous Cell Carcinoma (TCGA, Provisional)	Not Mutated	4769.71
TCGA-CN-4730-01	Head and Neck Squamous Cell Carcinoma (TCGA, Provisional)	Not Mutated	103.058
TCGA-CN-4741-01	Head and Neck Squamous Cell Carcinoma (TCGA, Provisional)	Not Mutated	2277.97
TCGA-CN-5355-01	Head and Neck Squamous Cell Carcinoma (TCGA, Provisional)	Not Mutated	439.867
TCGA-CN-5369-01	Head and Neck Squamous Cell Carcinoma (TCGA, Provisional)	Not Mutated	1257.74
TCGA-CN-5374-01	Head and Neck Squamous Cell Carcinoma (TCGA, Provisional)	Not Mutated	2449.73
TCGA-CN-6010-01	Head and Neck Squamous Cell Carcinoma (TCGA, Provisional)	Not Mutated	466.027
TCGA-CQ-5323-01	Head and Neck Squamous Cell Carcinoma (TCGA, Provisional)	Not Mutated	2469.59
TCGA-CQ-5324-01	Head and Neck Squamous Cell Carcinoma (TCGA, Provisional)	Not Mutated	2509.6
TCGA-CQ-5325-01	Head and Neck Squamous Cell Carcinoma (TCGA, Provisional)	Not Mutated	1214.5
TCGA-CQ-6227-01	Head and Neck Squamous Cell Carcinoma (TCGA, Provisional)	Not Mutated	1534.9
TCGA-CQ-7068-01	Head and Neck Squamous Cell Carcinoma (TCGA, Provisional)	Not Mutated	2903.69
TCGA-CR-5243-01	Head and Neck Squamous Cell Carcinoma (TCGA, Provisional)	Not Mutated	4349.24
TCGA-CR-5247-01	Head and Neck Squamous Cell Carcinoma (TCGA, Provisional)	Not Mutated	469.324
TCGA-CR-5248-01	Head and Neck Squamous Cell Carcinoma (TCGA, Provisional)	Not Mutated	2335.61
TCGA-CR-5249-01	Head and Neck Squamous Cell Carcinoma (TCGA, Provisional)	Not Mutated	2912.95
TCGA-CR-5250-01	Head and Neck Squamous Cell Carcinoma (TCGA, Provisional)	Not Mutated	3557.95
TCGA-CR-6467-01	Head and Neck Squamous Cell Carcinoma (TCGA, Provisional)	Not Mutated	4950.01
TCGA-CR-6470-01	Head and Neck Squamous Cell Carcinoma (TCGA, Provisional)	Not Mutated	4428.9
TCGA-CR-6471-01	Head and Neck Squamous Cell Carcinoma (TCGA, Provisional)	Not Mutated	1558.98
TCGA-CR-6472-01	Head and Neck Squamous Cell Carcinoma (TCGA, Provisional)	Not Mutated	303.303
TCGA-CR-6473-01	Head and Neck Squamous Cell Carcinoma (TCGA, Provisional)	Not Mutated	2263.28
TCGA-CR-6481-01	Head and Neck Squamous Cell Carcinoma (TCGA, Provisional)	Not Mutated	2060.55
TCGA-CR-6482-01	Head and Neck Squamous Cell Carcinoma (TCGA, Provisional)	Not Mutated	2925.98
TCGA-CR-6487-01	Head and Neck Squamous Cell Carcinoma (TCGA, Provisional)	Not Mutated	6017.6
TCGA-CR-6488-01	Head and Neck Squamous Cell Carcinoma (TCGA, Provisional)	Not Mutated	867.921
TCGA-CR-6492-01	Head and Neck Squamous Cell Carcinoma (TCGA, Provisional)	Not Mutated	1737.64
TCGA-CR-7367-01	Head and Neck Squamous Cell Carcinoma (TCGA, Provisional)	Not Mutated	461.003
TCGA-CR-7369-01	Head and Neck Squamous Cell Carcinoma (TCGA, Provisional)	Not Mutated	1947.39
TCGA-CR-7373-01	Head and Neck Squamous Cell Carcinoma (TCGA, Provisional)	Not Mutated	1636.47
TCGA-CR-7382-01	Head and Neck Squamous Cell Carcinoma (TCGA, Provisional)	Not Mutated	1976.7
TCGA-CR-7385-01	Head and Neck Squamous Cell Carcinoma (TCGA, Provisional)	Not Mutated	2427.33
TCGA-CR-7391-01	Head and Neck Squamous Cell Carcinoma (TCGA, Provisional)	Not Mutated	1386.16
TCGA-CR-7392-01	Head and Neck Squamous Cell Carcinoma (TCGA, Provisional)	Not Mutated	556.11
TCGA-CR-7395-01	Head and Neck Squamous Cell Carcinoma (TCGA, Provisional)	Not Mutated	1501.81
TCGA-CR-7401-01	Head and Neck Squamous Cell Carcinoma (TCGA, Provisional)	Not Mutated	760.82
TCGA-CR-7404-01	Head and Neck Squamous Cell Carcinoma (TCGA, Provisional)	Not Mutated	2006.17
TCGA-CV-5441-01	Head and Neck Squamous Cell Carcinoma (TCGA, Provisional)	Not Mutated	217.33
TCGA-CV-5442-01	Head and Neck Squamous Cell Carcinoma (TCGA, Provisional)	Not Mutated	1309.06
TCGA-CV-5443-01	Head and Neck Squamous Cell Carcinoma (TCGA, Provisional)	Not Mutated	3005.24
TCGA-CV-5971-01	Head and Neck Squamous Cell Carcinoma (TCGA, Provisional)	Not Mutated	1206.68
TCGA-CV-6433-01	Head and Neck Squamous Cell Carcinoma (TCGA, Provisional)	Not Mutated	2882.01
TCGA-CV-6441-01	Head and Neck Squamous Cell Carcinoma (TCGA, Provisional)	Not Mutated	927.089
TCGA-CV-6938-01	Head and Neck Squamous Cell Carcinoma (TCGA, Provisional)	Not Mutated	1153.18
TCGA-CV-6939-01	Head and Neck Squamous Cell Carcinoma (TCGA, Provisional)	Not Mutated	2593.01
TCGA-CV-6954-01	Head and Neck Squamous Cell Carcinoma (TCGA, Provisional)	Not Mutated	318.023
TCGA-CV-6955-01	Head and Neck Squamous Cell Carcinoma (TCGA, Provisional)	Not Mutated	1649.21
TCGA-CV-6961-01	Head and Neck Squamous Cell Carcinoma (TCGA, Provisional)	Not Mutated	602.615
TCGA-CV-7100-01	Head and Neck Squamous Cell Carcinoma (TCGA, Provisional)	Not Mutated	3730.5
TCGA-CV-7183-01	Head and Neck Squamous Cell Carcinoma (TCGA, Provisional)	Not Mutated	814.554
TCGA-CV-7250-01	Head and Neck Squamous Cell Carcinoma (TCGA, Provisional)	Not Mutated	1545.64
TCGA-CV-7261-01	Head and Neck Squamous Cell Carcinoma (TCGA, Provisional)	Not Mutated	586.468
TCGA-CV-7406-01	Head and Neck Squamous Cell Carcinoma (TCGA, Provisional)	Not Mutated	1849.32
TCGA-CV-7407-01	Head and Neck Squamous Cell Carcinoma (TCGA, Provisional)	Not Mutated	2491.86
TCGA-CV-7410-01	Head and Neck Squamous Cell Carcinoma (TCGA, Provisional)	Not Mutated	1092.51
TCGA-CV-7411-01	Head and Neck Squamous Cell Carcinoma (TCGA, Provisional)	Not Mutated	904.888
TCGA-CV-7423-01	Head and Neck Squamous Cell Carcinoma (TCGA, Provisional)	Not Mutated	185.908
TCGA-CV-7427-01	Head and Neck Squamous Cell Carcinoma (TCGA, Provisional)	Not Mutated	1359.14
TCGA-CV-7429-01	Head and Neck Squamous Cell Carcinoma (TCGA, Provisional)	Not Mutated	1431.35
TCGA-CV-7440-01	Head and Neck Squamous Cell Carcinoma (TCGA, Provisional)	Not Mutated	1590.86
TCGA-CX-7085-01	Head and Neck Squamous Cell Carcinoma (TCGA, Provisional)	Not Mutated	921.514
TCGA-D6-6516-01	Head and Neck Squamous Cell Carcinoma (TCGA, Provisional)	Not Mutated	869.305
TCGA-DQ-5625-01	Head and Neck Squamous Cell Carcinoma (TCGA, Provisional)	Not Mutated	339.13
TCGA-DQ-7591-01	Head and Neck Squamous Cell Carcinoma (TCGA, Provisional)	Not Mutated	2763.76
TCGA-H7-7774-01	Head and Neck Squamous Cell Carcinoma (TCGA, Provisional)	Not Mutated	1442.63
TCGA-HD-7754-01	Head and Neck Squamous Cell Carcinoma (TCGA, Provisional)	Not Mutated	2727.51
TCGA-HD-7832-01	Head and Neck Squamous Cell Carcinoma (TCGA, Provisional)	Not Mutated	3776.22
TCGA-IQ-7631-01	Head and Neck Squamous Cell Carcinoma (TCGA, Provisional)	Not Mutated	1682.97
TCGA-IQ-7632-01	Head and Neck Squamous Cell Carcinoma (TCGA, Provisional)	Not Mutated	724.534
TCGA-BA-4074-01	Head and Neck Squamous Cell Carcinoma (TCGA, Provisional)	E258D	1805.51
TCGA-BA-4076-01	Head and Neck Squamous Cell Carcinoma (TCGA, Provisional)	Q136P	960.777
TCGA-BA-4078-01	Head and Neck Squamous Cell Carcinoma (TCGA, Provisional)	X225_splice	861.873
TCGA-BA-5151-01	Head and Neck Squamous Cell Carcinoma (TCGA, Provisional)	V143M	1630.69
TCGA-BA-5152-01	Head and Neck Squamous Cell Carcinoma (TCGA, Provisional)	G245S	1027.84
TCGA-BA-5555-01	Head and Neck Squamous Cell Carcinoma (TCGA, Provisional)	Y236C	3979.97
TCGA-BA-5557-01	Head and Neck Squamous Cell Carcinoma (TCGA, Provisional)	L201*	411.814
TCGA-BA-5558-01	Head and Neck Squamous Cell Carcinoma (TCGA, Provisional)	R175H, R282W	1080.7
TCGA-BA-6868-01	Head and Neck Squamous Cell Carcinoma (TCGA, Provisional)	L194P	1845.97
TCGA-BA-6869-01	Head and Neck Squamous Cell Carcinoma (TCGA, Provisional)	R156P, C238F	2129.95
TCGA-BA-6870-01	Head and Neck Squamous Cell Carcinoma (TCGA, Provisional)	C242Y	1798.66
TCGA-BA-6872-01	Head and Neck Squamous Cell Carcinoma (TCGA, Provisional)	R175H	1282.56
TCGA-BA-6873-01	Head and Neck Squamous Cell Carcinoma (TCGA, Provisional)	H193L, P177_C182del	2827.17
TCGA-BA-7269-01	Head and Neck Squamous Cell Carcinoma (TCGA, Provisional)	E224*	210.605
TCGA-BB-4217-01	Head and Neck Squamous Cell Carcinoma (TCGA, Provisional)	R158L	1971.53
TCGA-BB-4224-01	Head and Neck Squamous Cell Carcinoma (TCGA, Provisional)	Q144*, P219Lfs*2	212.552
TCGA-CN-4723-01	Head and Neck Squamous Cell Carcinoma (TCGA, Provisional)	C242F	2482.89
TCGA-CN-4725-01	Head and Neck Squamous Cell Carcinoma (TCGA, Provisional)	C275F	1013.91
TCGA-CN-4726-01	Head and Neck Squamous Cell Carcinoma (TCGA, Provisional)	X125_splice	229.599
TCGA-CN-4727-01	Head and Neck Squamous Cell Carcinoma (TCGA, Provisional)	E298*	196.66
TCGA-CN-4728-01	Head and Neck Squamous Cell Carcinoma (TCGA, Provisional)	P58Qfs*65	865.323
TCGA-CN-4729-01	Head and Neck Squamous Cell Carcinoma (TCGA, Provisional)	H179R, V157F	2702.47
TCGA-CN-4731-01	Head and Neck Squamous Cell Carcinoma (TCGA, Provisional)	E171*	221.399
TCGA-CN-4733-01	Head and Neck Squamous Cell Carcinoma (TCGA, Provisional)	R273H	2174.32
TCGA-CN-4735-01	Head and Neck Squamous Cell Carcinoma (TCGA, Provisional)	M237I	2204.72
TCGA-CN-4736-01	Head and Neck Squamous Cell Carcinoma (TCGA, Provisional)	H179Y, H193P	2056.84
TCGA-CN-4737-01	Head and Neck Squamous Cell Carcinoma (TCGA, Provisional)	H168L	781.999
TCGA-CN-4738-01	Head and Neck Squamous Cell Carcinoma (TCGA, Provisional)	H179Y, Q331*	1101.6
TCGA-CN-4739-01	Head and Neck Squamous Cell Carcinoma (TCGA, Provisional)	R337C	3129.25
TCGA-CN-4740-01	Head and Neck Squamous Cell Carcinoma (TCGA, Provisional)	X33_splice, Q136*	850.505
TCGA-CN-4742-01	Head and Neck Squamous Cell Carcinoma (TCGA, Provisional)	E294*	331.797
TCGA-CN-5356-01	Head and Neck Squamous Cell Carcinoma (TCGA, Provisional)	R273H	1926.06
TCGA-CN-5358-01	Head and Neck Squamous Cell Carcinoma (TCGA, Provisional)	R209Kfs*6	789.787
TCGA-CN-5359-01	Head and Neck Squamous Cell Carcinoma (TCGA, Provisional)	L201*	558.529
TCGA-CN-5360-01	Head and Neck Squamous Cell Carcinoma (TCGA, Provisional)	G154Afs*16	517.107
TCGA-CN-5363-01	Head and Neck Squamous Cell Carcinoma (TCGA, Provisional)	R283Afs*62	585.249
TCGA-CN-5364-01	Head and Neck Squamous Cell Carcinoma (TCGA, Provisional)	E298*	350.647
TCGA-CN-5365-01	Head and Neck Squamous Cell Carcinoma (TCGA, Provisional)	H193L	1974.69
TCGA-CN-5366-01	Head and Neck Squamous Cell Carcinoma (TCGA, Provisional)	V173M	3398.37
TCGA-CN-5367-01	Head and Neck Squamous Cell Carcinoma (TCGA, Provisional)	A161T, R273C	3412.38
TCGA-CN-5370-01	Head and Neck Squamous Cell Carcinoma (TCGA, Provisional)	X126_splice, R175H	1468.62
TCGA-CN-5373-01	Head and Neck Squamous Cell Carcinoma (TCGA, Provisional)	G245V	2132.66
TCGA-CN-6011-01	Head and Neck Squamous Cell Carcinoma (TCGA, Provisional)	P278S, L206Ifs*3	758.229
TCGA-CN-6012-01	Head and Neck Squamous Cell Carcinoma (TCGA, Provisional)	Y126S	2594.93
TCGA-CN-6013-01	Head and Neck Squamous Cell Carcinoma (TCGA, Provisional)	R282W	912.08
TCGA-CN-6016-01	Head and Neck Squamous Cell Carcinoma (TCGA, Provisional)	G245S	1618.29
TCGA-CN-6017-01	Head and Neck Squamous Cell Carcinoma (TCGA, Provisional)	A79Rfs*40	915.542
TCGA-CN-6018-01	Head and Neck Squamous Cell Carcinoma (TCGA, Provisional)	R248W	3927.43
TCGA-CN-6019-01	Head and Neck Squamous Cell Carcinoma (TCGA, Provisional)	X332_splice	1186.37
TCGA-CN-6020-01	Head and Neck Squamous Cell Carcinoma (TCGA, Provisional)	E224D	253.176
TCGA-CN-6021-01	Head and Neck Squamous Cell Carcinoma (TCGA, Provisional)	R65Qfs*84	263.059
TCGA-CN-6022-01	Head and Neck Squamous Cell Carcinoma (TCGA, Provisional)	X261_splice, R248W	2068.15
TCGA-CN-6023-01	Head and Neck Squamous Cell Carcinoma (TCGA, Provisional)	G245S	2583.89
TCGA-CN-6024-01	Head and Neck Squamous Cell Carcinoma (TCGA, Provisional)	L265R	2745.31
TCGA-CN-6988-01	Head and Neck Squamous Cell Carcinoma (TCGA, Provisional)	K139Cfs*6	127.619
TCGA-CN-6989-01	Head and Neck Squamous Cell Carcinoma (TCGA, Provisional)	T256Hfs*8	686.735
TCGA-CN-6992-01	Head and Neck Squamous Cell Carcinoma (TCGA, Provisional)	G245D, R249M, Q331H	1656.12
TCGA-CN-6994-01	Head and Neck Squamous Cell Carcinoma (TCGA, Provisional)	R175H, R283P	2151.37
TCGA-CN-6995-01	Head and Neck Squamous Cell Carcinoma (TCGA, Provisional)	L330Ffs*15, E298*	332.781
TCGA-CN-6997-01	Head and Neck Squamous Cell Carcinoma (TCGA, Provisional)	Q136*	380.871
TCGA-CN-6998-01	Head and Neck Squamous Cell Carcinoma (TCGA, Provisional)	R306*	108.636
TCGA-CQ-5326-01	Head and Neck Squamous Cell Carcinoma (TCGA, Provisional)	X32_splice, R249S	637.755
TCGA-CQ-5329-01	Head and Neck Squamous Cell Carcinoma (TCGA, Provisional)	R273H	2652.06
TCGA-CQ-5330-01	Head and Neck Squamous Cell Carcinoma (TCGA, Provisional)	G266R	1014.75
TCGA-CQ-5331-01	Head and Neck Squamous Cell Carcinoma (TCGA, Provisional)	X307_splice, R280T	1278.61
TCGA-CQ-5332-01	Head and Neck Squamous Cell Carcinoma (TCGA, Provisional)	P151S	2114.12
TCGA-CQ-5334-01	Head and Neck Squamous Cell Carcinoma (TCGA, Provisional)	R158H, S166*	1341.55
TCGA-CQ-6218-01	Head and Neck Squamous Cell Carcinoma (TCGA, Provisional)	V218G, I195Sfs*52	846.382
TCGA-CQ-6220-01	Head and Neck Squamous Cell Carcinoma (TCGA, Provisional)	R280G	1097.89
TCGA-CQ-6221-01	Head and Neck Squamous Cell Carcinoma (TCGA, Provisional)	V272M	3453.37
TCGA-CQ-6223-01	Head and Neck Squamous Cell Carcinoma (TCGA, Provisional)	A159V	510.454
TCGA-CQ-6224-01	Head and Neck Squamous Cell Carcinoma (TCGA, Provisional)	R248Q	1055.48
TCGA-CQ-6225-01	Head and Neck Squamous Cell Carcinoma (TCGA, Provisional)	C176S	1691.98
TCGA-CQ-6228-01	Head and Neck Squamous Cell Carcinoma (TCGA, Provisional)	K101*	311.68
TCGA-CQ-6229-01	Head and Neck Squamous Cell Carcinoma (TCGA, Provisional)	R213*	305.486
TCGA-CQ-7065-01	Head and Neck Squamous Cell Carcinoma (TCGA, Provisional)	H179P	675.799
TCGA-CR-6474-01	Head and Neck Squamous Cell Carcinoma (TCGA, Provisional)	G245V	3065.24
TCGA-CR-6477-01	Head and Neck Squamous Cell Carcinoma (TCGA, Provisional)	R342Efs*3	625.916
TCGA-CR-6478-01	Head and Neck Squamous Cell Carcinoma (TCGA, Provisional)	H179R	1773.1
TCGA-CR-6484-01	Head and Neck Squamous Cell Carcinoma (TCGA, Provisional)	R196*	523.009
TCGA-CR-6491-01	Head and Neck Squamous Cell Carcinoma (TCGA, Provisional)	M237V, H179R	1107.62
TCGA-CR-6493-01	Head and Neck Squamous Cell Carcinoma (TCGA, Provisional)	C229Yfs*10, S127Y	823.394
TCGA-CR-7364-01	Head and Neck Squamous Cell Carcinoma (TCGA, Provisional)	P85Lfs*38	375.575
TCGA-CR-7365-01	Head and Neck Squamous Cell Carcinoma (TCGA, Provisional)	V216M	1555.47
TCGA-CR-7368-01	Head and Neck Squamous Cell Carcinoma (TCGA, Provisional)	R248Q	3691.58
TCGA-CR-7370-01	Head and Neck Squamous Cell Carcinoma (TCGA, Provisional)	C238S	1847.16
TCGA-CR-7371-01	Head and Neck Squamous Cell Carcinoma (TCGA, Provisional)	R175H	1634.78
TCGA-CR-7372-01	Head and Neck Squamous Cell Carcinoma (TCGA, Provisional)	P80Sfs*69	337.688
TCGA-CR-7374-01	Head and Neck Squamous Cell Carcinoma (TCGA, Provisional)	G154Afs*16	380.038
TCGA-CR-7376-01	Head and Neck Squamous Cell Carcinoma (TCGA, Provisional)	X32_splice, R280S	1403.53
TCGA-CR-7377-01	Head and Neck Squamous Cell Carcinoma (TCGA, Provisional)	R306*	761.405
TCGA-CR-7379-01	Head and Neck Squamous Cell Carcinoma (TCGA, Provisional)	Q136H	1297.21
TCGA-CR-7380-01	Head and Neck Squamous Cell Carcinoma (TCGA, Provisional)	R282W	2206.7
TCGA-CR-7383-01	Head and Neck Squamous Cell Carcinoma (TCGA, Provisional)	X331_splice	699.485
TCGA-CR-7386-01	Head and Neck Squamous Cell Carcinoma (TCGA, Provisional)	T211Ffs*4	736.495
TCGA-CR-7388-01	Head and Neck Squamous Cell Carcinoma (TCGA, Provisional)	R273C	1943.72
TCGA-CR-7389-01	Head and Neck Squamous Cell Carcinoma (TCGA, Provisional)	S37Pfs*7	1389.45
TCGA-CR-7390-01	Head and Neck Squamous Cell Carcinoma (TCGA, Provisional)	S106R	202.372
TCGA-CR-7393-01	Head and Neck Squamous Cell Carcinoma (TCGA, Provisional)	D41Mfs*3	1593.01
TCGA-CR-7394-01	Head and Neck Squamous Cell Carcinoma (TCGA, Provisional)	R273H	1101.4
TCGA-CR-7397-01	Head and Neck Squamous Cell Carcinoma (TCGA, Provisional)	R248W	2692.39
TCGA-CR-7398-01	Head and Neck Squamous Cell Carcinoma (TCGA, Provisional)	R337L	2176.92
TCGA-CR-7399-01	Head and Neck Squamous Cell Carcinoma (TCGA, Provisional)	P278S, R213L	3177.47
TCGA-CR-7402-01	Head and Neck Squamous Cell Carcinoma (TCGA, Provisional)	R267P	3877.81
TCGA-CV-5430-01	Head and Neck Squamous Cell Carcinoma (TCGA, Provisional)	R282W, S90Vfs*55	2603.92
TCGA-CV-5431-01	Head and Neck Squamous Cell Carcinoma (TCGA, Provisional)	I195T	2592.22
TCGA-CV-5432-01	Head and Neck Squamous Cell Carcinoma (TCGA, Provisional)	X307_splice	510.371
TCGA-CV-5434-01	Head and Neck Squamous Cell Carcinoma (TCGA, Provisional)	Y236C, R213*	1723.98
TCGA-CV-5435-01	Head and Neck Squamous Cell Carcinoma (TCGA, Provisional)	W91*	485.071
TCGA-CV-5436-01	Head and Neck Squamous Cell Carcinoma (TCGA, Provisional)	G266E, E56*	1173.89
TCGA-CV-5439-01	Head and Neck Squamous Cell Carcinoma (TCGA, Provisional)	Q317Pfs*20	323.832
TCGA-CV-5440-01	Head and Neck Squamous Cell Carcinoma (TCGA, Provisional)	R110L, C176Y	2648.59
TCGA-CV-5444-01	Head and Neck Squamous Cell Carcinoma (TCGA, Provisional)	M1?, K139_P142delinsT	1446.5
TCGA-CV-5966-01	Head and Neck Squamous Cell Carcinoma (TCGA, Provisional)	P151T	2575.52
TCGA-CV-5970-01	Head and Neck Squamous Cell Carcinoma (TCGA, Provisional)	R248Q	1111.8
TCGA-CV-5973-01	Head and Neck Squamous Cell Carcinoma (TCGA, Provisional)	R282W	1309.68
TCGA-CV-5976-01	Head and Neck Squamous Cell Carcinoma (TCGA, Provisional)	R110L, Y220C	3000.6
TCGA-CV-5977-01	Head and Neck Squamous Cell Carcinoma (TCGA, Provisional)	E286K	1347.32
TCGA-CV-5978-01	Head and Neck Squamous Cell Carcinoma (TCGA, Provisional)	V172F	1804.66
TCGA-CV-5979-01	Head and Neck Squamous Cell Carcinoma (TCGA, Provisional)	R248Q	1144.14
TCGA-CV-6003-01	Head and Neck Squamous Cell Carcinoma (TCGA, Provisional)	R342*	367.04
TCGA-CV-6436-01	Head and Neck Squamous Cell Carcinoma (TCGA, Provisional)	R273H	1715.09
TCGA-CV-6933-01	Head and Neck Squamous Cell Carcinoma (TCGA, Provisional)	Q192*	407.434
TCGA-CV-6934-01	Head and Neck Squamous Cell Carcinoma (TCGA, Provisional)	Y205C	1614.94
TCGA-CV-6935-01	Head and Neck Squamous Cell Carcinoma (TCGA, Provisional)	C242S	4018.71
TCGA-CV-6936-01	Head and Neck Squamous Cell Carcinoma (TCGA, Provisional)	V173L	1807.54
TCGA-CV-6937-01	Head and Neck Squamous Cell Carcinoma (TCGA, Provisional)	L206Wfs*41	294.269
TCGA-CV-6940-01	Head and Neck Squamous Cell Carcinoma (TCGA, Provisional)	V274_G279del	4571.31
TCGA-CV-6941-01	Head and Neck Squamous Cell Carcinoma (TCGA, Provisional)	P177_C182del	2362.35
TCGA-CV-6942-01	Head and Neck Squamous Cell Carcinoma (TCGA, Provisional)	R213*, Q331*	587.524
TCGA-CV-6943-01	Head and Neck Squamous Cell Carcinoma (TCGA, Provisional)	R248W	1999.05
TCGA-CV-6945-01	Head and Neck Squamous Cell Carcinoma (TCGA, Provisional)	H193L	1750.11
TCGA-CV-6948-01	Head and Neck Squamous Cell Carcinoma (TCGA, Provisional)	X307_splice, G302Efs*3	894.441
TCGA-CV-6950-01	Head and Neck Squamous Cell Carcinoma (TCGA, Provisional)	V203Gfs*44	248.058
TCGA-CV-6951-01	Head and Neck Squamous Cell Carcinoma (TCGA, Provisional)	F270C, T211I	3857.51
TCGA-CV-6952-01	Head and Neck Squamous Cell Carcinoma (TCGA, Provisional)	C275F	1538.66
TCGA-CV-6953-01	Head and Neck Squamous Cell Carcinoma (TCGA, Provisional)	R248W	351.443
TCGA-CV-6956-01	Head and Neck Squamous Cell Carcinoma (TCGA, Provisional)	R110Wfs*12	155.938
TCGA-CV-6959-01	Head and Neck Squamous Cell Carcinoma (TCGA, Provisional)	S99Rfs*23	295.793
TCGA-CV-6960-01	Head and Neck Squamous Cell Carcinoma (TCGA, Provisional)	G266*	1492.11
TCGA-CV-6962-01	Head and Neck Squamous Cell Carcinoma (TCGA, Provisional)	H193R	3902.33
TCGA-CV-7089-01	Head and Neck Squamous Cell Carcinoma (TCGA, Provisional)	Y163C	1442.42
TCGA-CV-7090-01	Head and Neck Squamous Cell Carcinoma (TCGA, Provisional)	R273H	1907.88
TCGA-CV-7091-01	Head and Neck Squamous Cell Carcinoma (TCGA, Provisional)	P27Lfs*17	1532.44
TCGA-CV-7095-01	Head and Neck Squamous Cell Carcinoma (TCGA, Provisional)	R196*	161.952
TCGA-CV-7097-01	Head and Neck Squamous Cell Carcinoma (TCGA, Provisional)	X331_splice	340.136
TCGA-CV-7099-01	Head and Neck Squamous Cell Carcinoma (TCGA, Provisional)	E285K	1633.99
TCGA-CV-7101-01	Head and Neck Squamous Cell Carcinoma (TCGA, Provisional)	E171*	756.667
TCGA-CV-7102-01	Head and Neck Squamous Cell Carcinoma (TCGA, Provisional)	G266E	710.383
TCGA-CV-7103-01	Head and Neck Squamous Cell Carcinoma (TCGA, Provisional)	P151Rfs*27	596.497
TCGA-CV-7104-01	Head and Neck Squamous Cell Carcinoma (TCGA, Provisional)	X225_splice, Q38*	505.593
TCGA-CV-7177-01	Head and Neck Squamous Cell Carcinoma (TCGA, Provisional)	P151H	2042.4
TCGA-CV-7178-01	Head and Neck Squamous Cell Carcinoma (TCGA, Provisional)	N268_R273del	1618.22
TCGA-CV-7180-01	Head and Neck Squamous Cell Carcinoma (TCGA, Provisional)	R248W	1424.66
TCGA-CV-7235-01	Head and Neck Squamous Cell Carcinoma (TCGA, Provisional)	Y234C	3166.27
TCGA-CV-7236-01	Head and Neck Squamous Cell Carcinoma (TCGA, Provisional)	V143M	2307.53
TCGA-CV-7238-01	Head and Neck Squamous Cell Carcinoma (TCGA, Provisional)	R196*	472.211
TCGA-CV-7242-01	Head and Neck Squamous Cell Carcinoma (TCGA, Provisional)	V173M	2357.35
TCGA-CV-7243-01	Head and Neck Squamous Cell Carcinoma (TCGA, Provisional)	T155_A161del	3186.55
TCGA-CV-7245-01	Head and Neck Squamous Cell Carcinoma (TCGA, Provisional)	R282W	1868.98
TCGA-CV-7247-01	Head and Neck Squamous Cell Carcinoma (TCGA, Provisional)	K132N	1740.46
TCGA-CV-7248-01	Head and Neck Squamous Cell Carcinoma (TCGA, Provisional)	C242F	2328
TCGA-CV-7252-01	Head and Neck Squamous Cell Carcinoma (TCGA, Provisional)	Q52*, I195Lfs*53	309.863
TCGA-CV-7253-01	Head and Neck Squamous Cell Carcinoma (TCGA, Provisional)	E271V	563.491
TCGA-CV-7254-01	Head and Neck Squamous Cell Carcinoma (TCGA, Provisional)	E258A	2146.8
TCGA-CV-7255-01	Head and Neck Squamous Cell Carcinoma (TCGA, Provisional)	R306*	260.81
TCGA-CV-7263-01	Head and Neck Squamous Cell Carcinoma (TCGA, Provisional)	Y103*	425.984
TCGA-CV-7413-01	Head and Neck Squamous Cell Carcinoma (TCGA, Provisional)	G105C	2092.23
TCGA-CV-7414-01	Head and Neck Squamous Cell Carcinoma (TCGA, Provisional)	E285K	4996.48
TCGA-CV-7415-01	Head and Neck Squamous Cell Carcinoma (TCGA, Provisional)	M133K	1858.47
TCGA-CV-7416-01	Head and Neck Squamous Cell Carcinoma (TCGA, Provisional)	R175H	1157.91
TCGA-CV-7418-01	Head and Neck Squamous Cell Carcinoma (TCGA, Provisional)	R249S	3535.4
TCGA-CV-7421-01	Head and Neck Squamous Cell Carcinoma (TCGA, Provisional)	S127F	1998.87
TCGA-CV-7422-01	Head and Neck Squamous Cell Carcinoma (TCGA, Provisional)	Q104*	403.547
TCGA-CV-7424-01	Head and Neck Squamous Cell Carcinoma (TCGA, Provisional)	R306*	397.324
TCGA-CV-7430-01	Head and Neck Squamous Cell Carcinoma (TCGA, Provisional)	Y126C	2261.36
TCGA-CV-7432-01	Head and Neck Squamous Cell Carcinoma (TCGA, Provisional)	S240Gfs*20	136.206
TCGA-CV-7433-01	Head and Neck Squamous Cell Carcinoma (TCGA, Provisional)	P278S	2438.52
TCGA-CV-7434-01	Head and Neck Squamous Cell Carcinoma (TCGA, Provisional)	C135Afs*35	204.15
TCGA-CV-7435-01	Head and Neck Squamous Cell Carcinoma (TCGA, Provisional)	Y220C	1421.03
TCGA-CV-7437-01	Head and Neck Squamous Cell Carcinoma (TCGA, Provisional)	T118Qfs*5	198.409
TCGA-CV-7438-01	Head and Neck Squamous Cell Carcinoma (TCGA, Provisional)	R213*	467.87
TCGA-CX-7082-01	Head and Neck Squamous Cell Carcinoma (TCGA, Provisional)	R213*	412.986
TCGA-CX-7086-01	Head and Neck Squamous Cell Carcinoma (TCGA, Provisional)	E294Sfs*51	311.249
TCGA-CX-7219-01	Head and Neck Squamous Cell Carcinoma (TCGA, Provisional)	R196P	2145.2
TCGA-D6-6515-01	Head and Neck Squamous Cell Carcinoma (TCGA, Provisional)	R273H	2034.61
TCGA-D6-6517-01	Head and Neck Squamous Cell Carcinoma (TCGA, Provisional)	R175H	1178.95
TCGA-D6-6823-01	Head and Neck Squamous Cell Carcinoma (TCGA, Provisional)	L137Q	1313.99
TCGA-D6-6824-01	Head and Neck Squamous Cell Carcinoma (TCGA, Provisional)	MA160IS	1711.18
TCGA-D6-6825-01	Head and Neck Squamous Cell Carcinoma (TCGA, Provisional)	X187_splice	331.886
TCGA-D6-6826-01	Head and Neck Squamous Cell Carcinoma (TCGA, Provisional)	V173G	1090.34
TCGA-DQ-5624-01	Head and Neck Squamous Cell Carcinoma (TCGA, Provisional)	P223Afs*3	303.118
TCGA-DQ-5629-01	Head and Neck Squamous Cell Carcinoma (TCGA, Provisional)	V157F	2509.56
TCGA-DQ-5630-01	Head and Neck Squamous Cell Carcinoma (TCGA, Provisional)	K320Nfs*19	560.14
TCGA-DQ-5631-01	Head and Neck Squamous Cell Carcinoma (TCGA, Provisional)	E336*, G245S	1013.54
TCGA-DQ-7588-01	Head and Neck Squamous Cell Carcinoma (TCGA, Provisional)	H178Tfs*69	60.574
TCGA-DQ-7592-01	Head and Neck Squamous Cell Carcinoma (TCGA, Provisional)	Y236D	1280.58
TCGA-F7-7848-01	Head and Neck Squamous Cell Carcinoma (TCGA, Provisional)	P58Qfs*65, E286V	1532.98
TCGA-HD-7229-01	Head and Neck Squamous Cell Carcinoma (TCGA, Provisional)	H179Y	789.679
TCGA-HD-7753-01	Head and Neck Squamous Cell Carcinoma (TCGA, Provisional)	V274dup	1165.59
TCGA-HD-7831-01	Head and Neck Squamous Cell Carcinoma (TCGA, Provisional)	S215Kfs*7	978.779
TCGA-IQ-7630-01	Head and Neck Squamous Cell Carcinoma (TCGA, Provisional)	G245S, R248Q	2148.33
TCGA-4P-AA8J-01	Head and Neck Squamous Cell Carcinoma (TCGA, Provisional)	Not Sequenced	822.678
TCGA-BA-4075-01	Head and Neck Squamous Cell Carcinoma (TCGA, Provisional)	Not Sequenced	383.76
TCGA-BA-A4IF-01	Head and Neck Squamous Cell Carcinoma (TCGA, Provisional)	Not Sequenced	4020.11
TCGA-BA-A4IG-01	Head and Neck Squamous Cell Carcinoma (TCGA, Provisional)	Not Sequenced	3743.48
TCGA-BA-A4IH-01	Head and Neck Squamous Cell Carcinoma (TCGA, Provisional)	Not Sequenced	2282.63
TCGA-BA-A4II-01	Head and Neck Squamous Cell Carcinoma (TCGA, Provisional)	Not Sequenced	1367.08
TCGA-BA-A6D8-01	Head and Neck Squamous Cell Carcinoma (TCGA, Provisional)	Not Sequenced	380.137
TCGA-BA-A6DA-01	Head and Neck Squamous Cell Carcinoma (TCGA, Provisional)	Not Sequenced	311.618
TCGA-BA-A6DB-01	Head and Neck Squamous Cell Carcinoma (TCGA, Provisional)	Not Sequenced	1367.18
TCGA-BA-A6DD-01	Head and Neck Squamous Cell Carcinoma (TCGA, Provisional)	Not Sequenced	1624.37
TCGA-BA-A6DE-01	Head and Neck Squamous Cell Carcinoma (TCGA, Provisional)	Not Sequenced	1154.15
TCGA-BA-A6DG-01	Head and Neck Squamous Cell Carcinoma (TCGA, Provisional)	Not Sequenced	790.749
TCGA-BA-A6DI-01	Head and Neck Squamous Cell Carcinoma (TCGA, Provisional)	Not Sequenced	1002.82
TCGA-BA-A6DJ-01	Head and Neck Squamous Cell Carcinoma (TCGA, Provisional)	Not Sequenced	1249.49
TCGA-BA-A6DL-01	Head and Neck Squamous Cell Carcinoma (TCGA, Provisional)	Not Sequenced	1452.16
TCGA-BA-A8YP-01	Head and Neck Squamous Cell Carcinoma (TCGA, Provisional)	Not Sequenced	334.147
TCGA-BB-4227-01	Head and Neck Squamous Cell Carcinoma (TCGA, Provisional)	Not Sequenced	104.912
TCGA-BB-7861-01	Head and Neck Squamous Cell Carcinoma (TCGA, Provisional)	Not Sequenced	2818.07
TCGA-BB-7862-01	Head and Neck Squamous Cell Carcinoma (TCGA, Provisional)	Not Sequenced	1111.44
TCGA-BB-7863-01	Head and Neck Squamous Cell Carcinoma (TCGA, Provisional)	Not Sequenced	1164.42
TCGA-BB-7864-01	Head and Neck Squamous Cell Carcinoma (TCGA, Provisional)	Not Sequenced	1999.45
TCGA-BB-7866-01	Head and Neck Squamous Cell Carcinoma (TCGA, Provisional)	Not Sequenced	1509.68
TCGA-BB-7870-01	Head and Neck Squamous Cell Carcinoma (TCGA, Provisional)	Not Sequenced	162.639
TCGA-BB-7871-01	Head and Neck Squamous Cell Carcinoma (TCGA, Provisional)	Not Sequenced	1167.72
TCGA-BB-7872-01	Head and Neck Squamous Cell Carcinoma (TCGA, Provisional)	Not Sequenced	416.415
TCGA-BB-8596-01	Head and Neck Squamous Cell Carcinoma (TCGA, Provisional)	Not Sequenced	619.737
TCGA-BB-8601-01	Head and Neck Squamous Cell Carcinoma (TCGA, Provisional)	Not Sequenced	254.13
TCGA-BB-A5HU-01	Head and Neck Squamous Cell Carcinoma (TCGA, Provisional)	Not Sequenced	1652.33
TCGA-BB-A5HY-01	Head and Neck Squamous Cell Carcinoma (TCGA, Provisional)	Not Sequenced	199.933
TCGA-BB-A5HZ-01	Head and Neck Squamous Cell Carcinoma (TCGA, Provisional)	Not Sequenced	1612.89
TCGA-BB-A6UM-01	Head and Neck Squamous Cell Carcinoma (TCGA, Provisional)	Not Sequenced	2315.33
TCGA-BB-A6UO-01	Head and Neck Squamous Cell Carcinoma (TCGA, Provisional)	Not Sequenced	379.873
TCGA-C9-A47Z-01	Head and Neck Squamous Cell Carcinoma (TCGA, Provisional)	Not Sequenced	933.22
TCGA-C9-A480-01	Head and Neck Squamous Cell Carcinoma (TCGA, Provisional)	Not Sequenced	1584.44
TCGA-CN-4722-01	Head and Neck Squamous Cell Carcinoma (TCGA, Provisional)	Not Sequenced	1557.38
TCGA-CN-4734-01	Head and Neck Squamous Cell Carcinoma (TCGA, Provisional)	Not Sequenced	1448.57
TCGA-CN-5361-01	Head and Neck Squamous Cell Carcinoma (TCGA, Provisional)	Not Sequenced	470.459
TCGA-CN-6996-01	Head and Neck Squamous Cell Carcinoma (TCGA, Provisional)	Not Sequenced	2053.45
TCGA-CN-A497-01	Head and Neck Squamous Cell Carcinoma (TCGA, Provisional)	Not Sequenced	1646.94
TCGA-CN-A498-01	Head and Neck Squamous Cell Carcinoma (TCGA, Provisional)	Not Sequenced	498.097
TCGA-CN-A499-01	Head and Neck Squamous Cell Carcinoma (TCGA, Provisional)	Not Sequenced	3175.8
TCGA-CN-A49A-01	Head and Neck Squamous Cell Carcinoma (TCGA, Provisional)	Not Sequenced	1073.24
TCGA-CN-A49B-01	Head and Neck Squamous Cell Carcinoma (TCGA, Provisional)	Not Sequenced	2689.05
TCGA-CN-A49C-01	Head and Neck Squamous Cell Carcinoma (TCGA, Provisional)	Not Sequenced	2600.02
TCGA-CN-A63T-01	Head and Neck Squamous Cell Carcinoma (TCGA, Provisional)	Not Sequenced	901.675
TCGA-CN-A63U-01	Head and Neck Squamous Cell Carcinoma (TCGA, Provisional)	Not Sequenced	570.928
TCGA-CN-A63V-01	Head and Neck Squamous Cell Carcinoma (TCGA, Provisional)	Not Sequenced	1833.99
TCGA-CN-A63W-01	Head and Neck Squamous Cell Carcinoma (TCGA, Provisional)	Not Sequenced	182.791
TCGA-CN-A641-01	Head and Neck Squamous Cell Carcinoma (TCGA, Provisional)	Not Sequenced	664.062
TCGA-CN-A642-01	Head and Neck Squamous Cell Carcinoma (TCGA, Provisional)	Not Sequenced	2145.56
TCGA-CN-A6UY-01	Head and Neck Squamous Cell Carcinoma (TCGA, Provisional)	Not Sequenced	3611.36
TCGA-CN-A6V1-01	Head and Neck Squamous Cell Carcinoma (TCGA, Provisional)	Not Sequenced	2678.77
TCGA-CN-A6V3-01	Head and Neck Squamous Cell Carcinoma (TCGA, Provisional)	Not Sequenced	845.567
TCGA-CN-A6V6-01	Head and Neck Squamous Cell Carcinoma (TCGA, Provisional)	Not Sequenced	2579.59
TCGA-CN-A6V7-01	Head and Neck Squamous Cell Carcinoma (TCGA, Provisional)	Not Sequenced	3202.22
TCGA-CQ-5327-01	Head and Neck Squamous Cell Carcinoma (TCGA, Provisional)	Not Sequenced	1275.5
TCGA-CQ-5333-01	Head and Neck Squamous Cell Carcinoma (TCGA, Provisional)	Not Sequenced	1782.55
TCGA-CQ-6219-01	Head and Neck Squamous Cell Carcinoma (TCGA, Provisional)	Not Sequenced	4426.71
TCGA-CQ-6222-01	Head and Neck Squamous Cell Carcinoma (TCGA, Provisional)	Not Sequenced	1017.62
TCGA-CQ-7063-01	Head and Neck Squamous Cell Carcinoma (TCGA, Provisional)	Not Sequenced	1611.03
TCGA-CQ-7067-01	Head and Neck Squamous Cell Carcinoma (TCGA, Provisional)	Not Sequenced	298.855
TCGA-CQ-7069-01	Head and Neck Squamous Cell Carcinoma (TCGA, Provisional)	Not Sequenced	390.123
TCGA-CQ-7071-01	Head and Neck Squamous Cell Carcinoma (TCGA, Provisional)	Not Sequenced	972.174
TCGA-CQ-7072-01	Head and Neck Squamous Cell Carcinoma (TCGA, Provisional)	Not Sequenced	1623.61
TCGA-CQ-A4C6-01	Head and Neck Squamous Cell Carcinoma (TCGA, Provisional)	Not Sequenced	284.365
TCGA-CQ-A4C7-01	Head and Neck Squamous Cell Carcinoma (TCGA, Provisional)	Not Sequenced	395.494
TCGA-CQ-A4C9-01	Head and Neck Squamous Cell Carcinoma (TCGA, Provisional)	Not Sequenced	1325.28
TCGA-CQ-A4CA-01	Head and Neck Squamous Cell Carcinoma (TCGA, Provisional)	Not Sequenced	528.846
TCGA-CQ-A4CB-01	Head and Neck Squamous Cell Carcinoma (TCGA, Provisional)	Not Sequenced	1028.63
TCGA-CQ-A4CD-01	Head and Neck Squamous Cell Carcinoma (TCGA, Provisional)	Not Sequenced	1611.2
TCGA-CQ-A4CE-01	Head and Neck Squamous Cell Carcinoma (TCGA, Provisional)	Not Sequenced	201.14
TCGA-CQ-A4CG-01	Head and Neck Squamous Cell Carcinoma (TCGA, Provisional)	Not Sequenced	1146.2
TCGA-CQ-A4CH-01	Head and Neck Squamous Cell Carcinoma (TCGA, Provisional)	Not Sequenced	1143.15
TCGA-CQ-A4CI-01	Head and Neck Squamous Cell Carcinoma (TCGA, Provisional)	Not Sequenced	667.95
TCGA-CR-6480-01	Head and Neck Squamous Cell Carcinoma (TCGA, Provisional)	Not Sequenced	3192.61
TCGA-CV-7409-01	Head and Neck Squamous Cell Carcinoma (TCGA, Provisional)	Not Sequenced	317.399
TCGA-CV-7425-01	Head and Neck Squamous Cell Carcinoma (TCGA, Provisional)	Not Sequenced	1103.04
TCGA-CV-7428-01	Head and Neck Squamous Cell Carcinoma (TCGA, Provisional)	Not Sequenced	195.278
TCGA-CV-7446-01	Head and Neck Squamous Cell Carcinoma (TCGA, Provisional)	Not Sequenced	3336.27
TCGA-CV-7568-01	Head and Neck Squamous Cell Carcinoma (TCGA, Provisional)	Not Sequenced	893.056
TCGA-CV-A45O-01	Head and Neck Squamous Cell Carcinoma (TCGA, Provisional)	Not Sequenced	555.139
TCGA-CV-A45P-01	Head and Neck Squamous Cell Carcinoma (TCGA, Provisional)	Not Sequenced	752.405
TCGA-CV-A45Q-01	Head and Neck Squamous Cell Carcinoma (TCGA, Provisional)	Not Sequenced	1310.9
TCGA-CV-A45R-01	Head and Neck Squamous Cell Carcinoma (TCGA, Provisional)	Not Sequenced	1659.77
TCGA-CV-A45T-01	Head and Neck Squamous Cell Carcinoma (TCGA, Provisional)	Not Sequenced	750.704
TCGA-CV-A45U-01	Head and Neck Squamous Cell Carcinoma (TCGA, Provisional)	Not Sequenced	203.704
TCGA-CV-A45V-01	Head and Neck Squamous Cell Carcinoma (TCGA, Provisional)	Not Sequenced	1023.73
TCGA-CV-A45W-01	Head and Neck Squamous Cell Carcinoma (TCGA, Provisional)	Not Sequenced	1008.81
TCGA-CV-A45X-01	Head and Neck Squamous Cell Carcinoma (TCGA, Provisional)	Not Sequenced	1208.99
TCGA-CV-A45Y-01	Head and Neck Squamous Cell Carcinoma (TCGA, Provisional)	Not Sequenced	604.741
TCGA-CV-A45Z-01	Head and Neck Squamous Cell Carcinoma (TCGA, Provisional)	Not Sequenced	1086.56
TCGA-CV-A460-01	Head and Neck Squamous Cell Carcinoma (TCGA, Provisional)	Not Sequenced	2064.12
TCGA-CV-A461-01	Head and Neck Squamous Cell Carcinoma (TCGA, Provisional)	Not Sequenced	1336.37
TCGA-CV-A463-01	Head and Neck Squamous Cell Carcinoma (TCGA, Provisional)	Not Sequenced	908.078
TCGA-CV-A464-01	Head and Neck Squamous Cell Carcinoma (TCGA, Provisional)	Not Sequenced	2626.39
TCGA-CV-A465-01	Head and Neck Squamous Cell Carcinoma (TCGA, Provisional)	Not Sequenced	845.797
TCGA-CV-A468-01	Head and Neck Squamous Cell Carcinoma (TCGA, Provisional)	Not Sequenced	1185.63
TCGA-CV-A6JD-01	Head and Neck Squamous Cell Carcinoma (TCGA, Provisional)	Not Sequenced	2477.9
TCGA-CV-A6JE-01	Head and Neck Squamous Cell Carcinoma (TCGA, Provisional)	Not Sequenced	1472.91
TCGA-CV-A6JM-01	Head and Neck Squamous Cell Carcinoma (TCGA, Provisional)	Not Sequenced	723.257
TCGA-CV-A6JN-01	Head and Neck Squamous Cell Carcinoma (TCGA, Provisional)	Not Sequenced	160
TCGA-CV-A6JO-01	Head and Neck Squamous Cell Carcinoma (TCGA, Provisional)	Not Sequenced	1167.42
TCGA-CV-A6JT-01	Head and Neck Squamous Cell Carcinoma (TCGA, Provisional)	Not Sequenced	1272.47
TCGA-CV-A6JU-01	Head and Neck Squamous Cell Carcinoma (TCGA, Provisional)	Not Sequenced	162.683
TCGA-CV-A6JY-01	Head and Neck Squamous Cell Carcinoma (TCGA, Provisional)	Not Sequenced	423.802
TCGA-CV-A6JZ-01	Head and Neck Squamous Cell Carcinoma (TCGA, Provisional)	Not Sequenced	2554.41
TCGA-CV-A6K0-01	Head and Neck Squamous Cell Carcinoma (TCGA, Provisional)	Not Sequenced	2092.82
TCGA-CV-A6K1-01	Head and Neck Squamous Cell Carcinoma (TCGA, Provisional)	Not Sequenced	181.368
TCGA-CV-A6K2-01	Head and Neck Squamous Cell Carcinoma (TCGA, Provisional)	Not Sequenced	706.091
TCGA-CX-A4AQ-01	Head and Neck Squamous Cell Carcinoma (TCGA, Provisional)	Not Sequenced	549.363
TCGA-D6-6827-01	Head and Neck Squamous Cell Carcinoma (TCGA, Provisional)	Not Sequenced	3453.37
TCGA-D6-8568-01	Head and Neck Squamous Cell Carcinoma (TCGA, Provisional)	Not Sequenced	1210.35
TCGA-D6-8569-01	Head and Neck Squamous Cell Carcinoma (TCGA, Provisional)	Not Sequenced	1078.03
TCGA-D6-A4Z9-01	Head and Neck Squamous Cell Carcinoma (TCGA, Provisional)	Not Sequenced	1656.1
TCGA-D6-A4ZB-01	Head and Neck Squamous Cell Carcinoma (TCGA, Provisional)	Not Sequenced	2122.17
TCGA-D6-A6EK-01	Head and Neck Squamous Cell Carcinoma (TCGA, Provisional)	Not Sequenced	599.815
TCGA-D6-A6EM-01	Head and Neck Squamous Cell Carcinoma (TCGA, Provisional)	Not Sequenced	1170.31
TCGA-D6-A6EN-01	Head and Neck Squamous Cell Carcinoma (TCGA, Provisional)	Not Sequenced	1843.36
TCGA-D6-A6EO-01	Head and Neck Squamous Cell Carcinoma (TCGA, Provisional)	Not Sequenced	177.73
TCGA-D6-A6EP-01	Head and Neck Squamous Cell Carcinoma (TCGA, Provisional)	Not Sequenced	355.065
TCGA-D6-A6EQ-01	Head and Neck Squamous Cell Carcinoma (TCGA, Provisional)	Not Sequenced	1691.47
TCGA-D6-A6ES-01	Head and Neck Squamous Cell Carcinoma (TCGA, Provisional)	Not Sequenced	68.6509
TCGA-D6-A74Q-01	Head and Neck Squamous Cell Carcinoma (TCGA, Provisional)	Not Sequenced	495.044
TCGA-DQ-7589-01	Head and Neck Squamous Cell Carcinoma (TCGA, Provisional)	Not Sequenced	2304.57
TCGA-DQ-7590-01	Head and Neck Squamous Cell Carcinoma (TCGA, Provisional)	Not Sequenced	3153.54
TCGA-DQ-7593-01	Head and Neck Squamous Cell Carcinoma (TCGA, Provisional)	Not Sequenced	3327.38
TCGA-DQ-7594-01	Head and Neck Squamous Cell Carcinoma (TCGA, Provisional)	Not Sequenced	2600.79
TCGA-DQ-7595-01	Head and Neck Squamous Cell Carcinoma (TCGA, Provisional)	Not Sequenced	1840.12
TCGA-DQ-7596-01	Head and Neck Squamous Cell Carcinoma (TCGA, Provisional)	Not Sequenced	2115.57
TCGA-F7-8298-01	Head and Neck Squamous Cell Carcinoma (TCGA, Provisional)	Not Sequenced	232.815
TCGA-F7-8489-01	Head and Neck Squamous Cell Carcinoma (TCGA, Provisional)	Not Sequenced	1769.96
TCGA-F7-A50G-01	Head and Neck Squamous Cell Carcinoma (TCGA, Provisional)	Not Sequenced	499.724
TCGA-F7-A50I-01	Head and Neck Squamous Cell Carcinoma (TCGA, Provisional)	Not Sequenced	1105.81
TCGA-F7-A50J-01	Head and Neck Squamous Cell Carcinoma (TCGA, Provisional)	Not Sequenced	857.921
TCGA-F7-A61S-01	Head and Neck Squamous Cell Carcinoma (TCGA, Provisional)	Not Sequenced	1278.97
TCGA-F7-A61V-01	Head and Neck Squamous Cell Carcinoma (TCGA, Provisional)	Not Sequenced	2113.48
TCGA-F7-A61W-01	Head and Neck Squamous Cell Carcinoma (TCGA, Provisional)	Not Sequenced	542.253
TCGA-F7-A620-01	Head and Neck Squamous Cell Carcinoma (TCGA, Provisional)	Not Sequenced	2007.11
TCGA-F7-A622-01	Head and Neck Squamous Cell Carcinoma (TCGA, Provisional)	Not Sequenced	119.518
TCGA-F7-A623-01	Head and Neck Squamous Cell Carcinoma (TCGA, Provisional)	Not Sequenced	139.148
TCGA-F7-A624-01	Head and Neck Squamous Cell Carcinoma (TCGA, Provisional)	Not Sequenced	1760.89
TCGA-H7-8501-01	Head and Neck Squamous Cell Carcinoma (TCGA, Provisional)	Not Sequenced	869.594
TCGA-H7-8502-01	Head and Neck Squamous Cell Carcinoma (TCGA, Provisional)	Not Sequenced	153.798
TCGA-H7-A6C4-01	Head and Neck Squamous Cell Carcinoma (TCGA, Provisional)	Not Sequenced	139.175
TCGA-H7-A76A-01	Head and Neck Squamous Cell Carcinoma (TCGA, Provisional)	Not Sequenced	1964.54
TCGA-HD-7917-01	Head and Neck Squamous Cell Carcinoma (TCGA, Provisional)	Not Sequenced	486.532
TCGA-HD-8224-01	Head and Neck Squamous Cell Carcinoma (TCGA, Provisional)	Not Sequenced	1034.85
TCGA-HD-8314-01	Head and Neck Squamous Cell Carcinoma (TCGA, Provisional)	Not Sequenced	2209.91
TCGA-HD-8634-01	Head and Neck Squamous Cell Carcinoma (TCGA, Provisional)	Not Sequenced	1330.57
TCGA-HD-8635-01	Head and Neck Squamous Cell Carcinoma (TCGA, Provisional)	Not Sequenced	769.833
TCGA-HD-A4C1-01	Head and Neck Squamous Cell Carcinoma (TCGA, Provisional)	Not Sequenced	1124.14
TCGA-HD-A633-01	Head and Neck Squamous Cell Carcinoma (TCGA, Provisional)	Not Sequenced	502.444
TCGA-HD-A634-01	Head and Neck Squamous Cell Carcinoma (TCGA, Provisional)	Not Sequenced	2168.21
TCGA-HD-A6HZ-01	Head and Neck Squamous Cell Carcinoma (TCGA, Provisional)	Not Sequenced	1196.27
TCGA-HD-A6I0-01	Head and Neck Squamous Cell Carcinoma (TCGA, Provisional)	Not Sequenced	707.124
TCGA-HL-7533-01	Head and Neck Squamous Cell Carcinoma (TCGA, Provisional)	Not Sequenced	2150.48
TCGA-IQ-A61E-01	Head and Neck Squamous Cell Carcinoma (TCGA, Provisional)	Not Sequenced	200.54
TCGA-IQ-A61G-01	Head and Neck Squamous Cell Carcinoma (TCGA, Provisional)	Not Sequenced	1551.89
TCGA-IQ-A61H-01	Head and Neck Squamous Cell Carcinoma (TCGA, Provisional)	Not Sequenced	250.282
TCGA-IQ-A61I-01	Head and Neck Squamous Cell Carcinoma (TCGA, Provisional)	Not Sequenced	2401.49
TCGA-IQ-A61J-01	Head and Neck Squamous Cell Carcinoma (TCGA, Provisional)	Not Sequenced	685.767
TCGA-IQ-A61O-01	Head and Neck Squamous Cell Carcinoma (TCGA, Provisional)	Not Sequenced	490.447
TCGA-IQ-A6SG-01	Head and Neck Squamous Cell Carcinoma (TCGA, Provisional)	Not Sequenced	1041.71
TCGA-IQ-A6SH-01	Head and Neck Squamous Cell Carcinoma (TCGA, Provisional)	Not Sequenced	222.5
TCGA-KU-A66S-01	Head and Neck Squamous Cell Carcinoma (TCGA, Provisional)	Not Sequenced	1660.61
TCGA-KU-A66T-01	Head and Neck Squamous Cell Carcinoma (TCGA, Provisional)	Not Sequenced	1517.78
TCGA-KU-A6H7-06	Head and Neck Squamous Cell Carcinoma (TCGA, Provisional)	Not Sequenced	3760.87
TCGA-KU-A6H7-01	Head and Neck Squamous Cell Carcinoma (TCGA, Provisional)	Not Sequenced	2276.05
TCGA-KU-A6H8-01	Head and Neck Squamous Cell Carcinoma (TCGA, Provisional)	Not Sequenced	1108.49
TCGA-MT-A51W-01	Head and Neck Squamous Cell Carcinoma (TCGA, Provisional)	Not Sequenced	1082.23
TCGA-MT-A51X-01	Head and Neck Squamous Cell Carcinoma (TCGA, Provisional)	Not Sequenced	230.904
TCGA-MT-A67A-01	Head and Neck Squamous Cell Carcinoma (TCGA, Provisional)	Not Sequenced	1309.79
TCGA-MT-A67D-01	Head and Neck Squamous Cell Carcinoma (TCGA, Provisional)	Not Sequenced	378.314
TCGA-MT-A67F-01	Head and Neck Squamous Cell Carcinoma (TCGA, Provisional)	Not Sequenced	934.517
TCGA-MT-A7BN-01	Head and Neck Squamous Cell Carcinoma (TCGA, Provisional)	Not Sequenced	301.111
TCGA-MZ-A5BI-01	Head and Neck Squamous Cell Carcinoma (TCGA, Provisional)	Not Sequenced	3936.02
TCGA-MZ-A6I9-01	Head and Neck Squamous Cell Carcinoma (TCGA, Provisional)	Not Sequenced	2427.94
TCGA-MZ-A7D7-01	Head and Neck Squamous Cell Carcinoma (TCGA, Provisional)	Not Sequenced	276.486
TCGA-P3-A5Q5-01	Head and Neck Squamous Cell Carcinoma (TCGA, Provisional)	Not Sequenced	1455.94
TCGA-P3-A5Q6-01	Head and Neck Squamous Cell Carcinoma (TCGA, Provisional)	Not Sequenced	1736.43
TCGA-P3-A5QA-01	Head and Neck Squamous Cell Carcinoma (TCGA, Provisional)	Not Sequenced	1239.75
TCGA-P3-A5QE-01	Head and Neck Squamous Cell Carcinoma (TCGA, Provisional)	Not Sequenced	3606.62
TCGA-P3-A5QF-01	Head and Neck Squamous Cell Carcinoma (TCGA, Provisional)	Not Sequenced	2586.01
TCGA-P3-A6SW-01	Head and Neck Squamous Cell Carcinoma (TCGA, Provisional)	Not Sequenced	1759.35
TCGA-P3-A6SX-01	Head and Neck Squamous Cell Carcinoma (TCGA, Provisional)	Not Sequenced	222.887
TCGA-P3-A6T0-01	Head and Neck Squamous Cell Carcinoma (TCGA, Provisional)	Not Sequenced	959.671
TCGA-P3-A6T2-01	Head and Neck Squamous Cell Carcinoma (TCGA, Provisional)	Not Sequenced	1226.86
TCGA-P3-A6T3-01	Head and Neck Squamous Cell Carcinoma (TCGA, Provisional)	Not Sequenced	844.192
TCGA-P3-A6T4-01	Head and Neck Squamous Cell Carcinoma (TCGA, Provisional)	Not Sequenced	180.875
TCGA-P3-A6T5-01	Head and Neck Squamous Cell Carcinoma (TCGA, Provisional)	Not Sequenced	2607.01
TCGA-P3-A6T6-01	Head and Neck Squamous Cell Carcinoma (TCGA, Provisional)	Not Sequenced	1707.6
TCGA-P3-A6T7-01	Head and Neck Squamous Cell Carcinoma (TCGA, Provisional)	Not Sequenced	141.412
TCGA-P3-A6T8-01	Head and Neck Squamous Cell Carcinoma (TCGA, Provisional)	Not Sequenced	1267.41
TCGA-QK-A64Z-01	Head and Neck Squamous Cell Carcinoma (TCGA, Provisional)	Not Sequenced	1275.94
TCGA-QK-A652-01	Head and Neck Squamous Cell Carcinoma (TCGA, Provisional)	Not Sequenced	1795.62
TCGA-QK-A6IF-01	Head and Neck Squamous Cell Carcinoma (TCGA, Provisional)	Not Sequenced	6453.94
TCGA-QK-A6IG-01	Head and Neck Squamous Cell Carcinoma (TCGA, Provisional)	Not Sequenced	443.262
TCGA-QK-A6IH-01	Head and Neck Squamous Cell Carcinoma (TCGA, Provisional)	Not Sequenced	602.3
TCGA-QK-A6II-01	Head and Neck Squamous Cell Carcinoma (TCGA, Provisional)	Not Sequenced	413.816
TCGA-QK-A6IJ-01	Head and Neck Squamous Cell Carcinoma (TCGA, Provisional)	Not Sequenced	239.774
TCGA-QK-A6V9-01	Head and Neck Squamous Cell Carcinoma (TCGA, Provisional)	Not Sequenced	2784.56
TCGA-QK-A6VB-01	Head and Neck Squamous Cell Carcinoma (TCGA, Provisional)	Not Sequenced	2334.53
TCGA-QK-A6VC-01	Head and Neck Squamous Cell Carcinoma (TCGA, Provisional)	Not Sequenced	460.423
TCGA-QK-A8Z7-01	Head and Neck Squamous Cell Carcinoma (TCGA, Provisional)	Not Sequenced	287.13
TCGA-QK-A8Z8-01	Head and Neck Squamous Cell Carcinoma (TCGA, Provisional)	Not Sequenced	1189.03
TCGA-QK-A8Z9-01	Head and Neck Squamous Cell Carcinoma (TCGA, Provisional)	Not Sequenced	3142.57
TCGA-QK-A8ZA-01	Head and Neck Squamous Cell Carcinoma (TCGA, Provisional)	Not Sequenced	2034.58
TCGA-QK-A8ZB-01	Head and Neck Squamous Cell Carcinoma (TCGA, Provisional)	Not Sequenced	305.592
TCGA-QK-AA3J-01	Head and Neck Squamous Cell Carcinoma (TCGA, Provisional)	Not Sequenced	2804.04
TCGA-QK-AA3K-01	Head and Neck Squamous Cell Carcinoma (TCGA, Provisional)	Not Sequenced	3133.38
TCGA-RS-A6TO-01	Head and Neck Squamous Cell Carcinoma (TCGA, Provisional)	Not Sequenced	704.8
TCGA-RS-A6TP-01	Head and Neck Squamous Cell Carcinoma (TCGA, Provisional)	Not Sequenced	1696.8
TCGA-T2-A6WX-01	Head and Neck Squamous Cell Carcinoma (TCGA, Provisional)	Not Sequenced	1808.77
TCGA-T2-A6WZ-01	Head and Neck Squamous Cell Carcinoma (TCGA, Provisional)	Not Sequenced	3087.35
TCGA-T2-A6X0-01	Head and Neck Squamous Cell Carcinoma (TCGA, Provisional)	Not Sequenced	2953.33
TCGA-T2-A6X2-01	Head and Neck Squamous Cell Carcinoma (TCGA, Provisional)	Not Sequenced	723.263
TCGA-T3-A92M-01	Head and Neck Squamous Cell Carcinoma (TCGA, Provisional)	Not Sequenced	621.311
TCGA-T3-A92N-01	Head and Neck Squamous Cell Carcinoma (TCGA, Provisional)	Not Sequenced	1437.43
TCGA-TN-A7HI-01	Head and Neck Squamous Cell Carcinoma (TCGA, Provisional)	Not Sequenced	3453.32
TCGA-TN-A7HJ-01	Head and Neck Squamous Cell Carcinoma (TCGA, Provisional)	Not Sequenced	774.63
TCGA-TN-A7HL-01	Head and Neck Squamous Cell Carcinoma (TCGA, Provisional)	Not Sequenced	2132.86
TCGA-UF-A718-01	Head and Neck Squamous Cell Carcinoma (TCGA, Provisional)	Not Sequenced	514.984
TCGA-UF-A719-01	Head and Neck Squamous Cell Carcinoma (TCGA, Provisional)	Not Sequenced	1982.02
TCGA-UF-A71A-06	Head and Neck Squamous Cell Carcinoma (TCGA, Provisional)	Not Sequenced	695.747
TCGA-UF-A71A-01	Head and Neck Squamous Cell Carcinoma (TCGA, Provisional)	Not Sequenced	616.61
TCGA-UF-A71B-01	Head and Neck Squamous Cell Carcinoma (TCGA, Provisional)	Not Sequenced	1313.79
TCGA-UF-A71D-01	Head and Neck Squamous Cell Carcinoma (TCGA, Provisional)	Not Sequenced	303.628
TCGA-UF-A71E-01	Head and Neck Squamous Cell Carcinoma (TCGA, Provisional)	Not Sequenced	439.319
TCGA-UF-A7J9-01	Head and Neck Squamous Cell Carcinoma (TCGA, Provisional)	Not Sequenced	1912.8
TCGA-UF-A7JA-01	Head and Neck Squamous Cell Carcinoma (TCGA, Provisional)	Not Sequenced	1226.67
TCGA-UF-A7JC-01	Head and Neck Squamous Cell Carcinoma (TCGA, Provisional)	Not Sequenced	177.442
TCGA-UF-A7JD-01	Head and Neck Squamous Cell Carcinoma (TCGA, Provisional)	Not Sequenced	635.274
TCGA-UF-A7JF-01	Head and Neck Squamous Cell Carcinoma (TCGA, Provisional)	Not Sequenced	1219.63
TCGA-UF-A7JH-01	Head and Neck Squamous Cell Carcinoma (TCGA, Provisional)	Not Sequenced	482.969
TCGA-UF-A7JJ-01	Head and Neck Squamous Cell Carcinoma (TCGA, Provisional)	Not Sequenced	550.627
TCGA-UF-A7JK-01	Head and Neck Squamous Cell Carcinoma (TCGA, Provisional)	Not Sequenced	2097.26
TCGA-UF-A7JO-01	Head and Neck Squamous Cell Carcinoma (TCGA, Provisional)	Not Sequenced	1604.88
TCGA-UF-A7JS-01	Head and Neck Squamous Cell Carcinoma (TCGA, Provisional)	Not Sequenced	2457.4
TCGA-UF-A7JT-01	Head and Neck Squamous Cell Carcinoma (TCGA, Provisional)	Not Sequenced	1684.85
TCGA-UF-A7JV-01	Head and Neck Squamous Cell Carcinoma (TCGA, Provisional)	Not Sequenced	1638.76
TCGA-UP-A6WW-01	Head and Neck Squamous Cell Carcinoma (TCGA, Provisional)	Not Sequenced	3145
TCGA-WA-A7GZ-01	Head and Neck Squamous Cell Carcinoma (TCGA, Provisional)	Not Sequenced	3370.19
TCGA-WA-A7H4-01	Head and Neck Squamous Cell Carcinoma (TCGA, Provisional)	Not Sequenced	683.494
