# Supplementary material for: TP53 exon-6 truncating mutations produce separation of function isoforms with pro-tumorigenic functions
Source: eLife journal article supplement (doi:10.7554/elife.17929), 2016-10-19
Supplement: supp [file elife-17929-supp-v2.zip › elife_poa_e17929_Supplementary_File_4.docx]

**Supplementary File 4:** Sequence of sense strand of shRNAs used in this study.

| shRNA | Sequence |
| --- | --- |
| Sh.p53-335 | 5'- CGGCGCACAGAGGAAGAGAAT -3' |
| Sh.p53-773 | 5'- GAAGACTCCAGTGGTAATCTA -3' |
| Sh.CypD-2682 | 5'- GTTCTTCATCTGCACCATAAA -3' |
| Sh.CypD-2683 | 5'- ATAGAATCTTTCGGCTCTAAG -3' |
| Sh.Rpa3-991 | 5'- GATCTTGGACTTTACAATGAA -3' |
