# Supplementary material for: TP53 exon-6 truncating mutations produce separation of function isoforms with pro-tumorigenic functions
Source: eLife journal article supplement (doi:10.7554/elife.17929), 2016-10-19
Supplement: supp [file elife-17929-supp-v2.zip › elife_poa_e17929_Supplementary_File_5.docx]

Supplementary File 5: Complimentary oligonucleotides used for cloning the indicated sgRNAs.

| sgRNA | Sequence |
| --- | --- |
| Ren g.208-F | 5'- CACCgGGTATAATACACCGCGCTAC -3' |
| Ren g.208-R | 5'- AAACGTAGCGCGGTGTATTATACCc -3' |
| p53 g.13-F | 5'-CACCgTCGACGCTAGGATCTGACTG -3' |
| p53 g.13-R | 5'- AAACCAGTCAGATCCTAGCGTCGAc -3' |
| p53 g.140-F | 5'- CACCgCCATTGTTCAATATCGTCCG -3' |
| p53 g.140-R | 5'- AAACCGGACGATATTGAACAATGGc -3' |
| CypD g.131-F | 5'- CACCgCAGGTACACGAGCGGGTTCC -3' |
| CypD g.131-R | 5'- AAACGGAACCCGCTCGTGTACCTGc -3' |
| Rpa3 g.44-F | 5'- CACCgGATGAATTGAGCTAGCATGC -3' |
| Rpa3 g.44-R | 5'- AAACGCATGCTAGCTCAATTCATCc -3' |
